# Supplementary material for: Retrospective screening of serum IgG glycosylation biomarker for primary Sjögren’s syndrome using lectin microarray
Source: PeerJ. 2023 Feb 22;11:e14853. doi: 10.7717/peerj.14853 (PMC9961092; doi:10.7717/peerj.14853)
Supplement: Supplemental Information 5 [file peerj-11-14853-s005.xlsx]

## Sheet: PBC（array）
	num	sex	age	ASCA	B2GP1	GP210	SP100	LC1	SLA	LKM	SS-A	SS-B	Scl-70	dsDNA	AMA-M2
29	1093	F	65	0.137313	0.824635	0.139241	12.6553				0	0	0	0	1
25	333、854	F	52	0.938619	0.333333	0.60678	9.88785				0	0	0	0	1
26	434、1127	F	52	0.641944	0.480984	0.213559	13.0841				0	0	0	0	1
30	572、666	F	75	0.420896	0.858038	0.601266	1.07282				0	0	0	0	1
28	P029	2	52	0.0613811	0.409396	0.213559	3.57944				0	0	0	0	1
42	P035/36	2	72								0	0	0	0	1
1	P041/210	2	56	0.161125	0.402685	0.0881356	0.205607	0.262834	0.0529412	0.122302	1	0	0	0	1
31	P044	2	34	0.887468	0.494407	5.99322	0.523364	0.0390144	0.155882	0.0719424	0	0	0	0	1
32	P045	2	63	0.104859	0.581655	7.30847	0.238318	0.0554415	0.0647059	0.0755396	0	0	0	0	1
19	P048	2	39	0.0460358	0.604027	0.901695	0.0981308	0.0431211	0.0470588	0.0863309	0	0	0	0	0
21	P056	2	62	0.11509	0.767338	0.732203	13.5841				1	0	0	0	1
33	P057	1	52	0.104859	0.82774	8.43051	0.233645	0.0492813	0.1	0.057554	0	0	0	0	1
22	P059	2	47	0.196931	0.666667	0.366102	1.85514				0	0	0	0	1
43	P061	1	54								0	0	0	0	1
44	P063	2	71								0	0	0	0	1
23	P067	2	43	0.0895141	0.436242	0.128814	14.1636				0	0	0	0	1
34	P068	2	43	0.181586	0.883669	8.58983	0.443925	0.036961	0.0941176	0.0503597	0	0	0	0	1
18	P070	2	67	0.649616	0.50783	0.305085	0.481308	0.110883	0.0735294	0.118705	0	0	0	0	0
35	P071	2	41	0.0409207	1.29978	5.48136	0.303738	0.036961	0.05	0.0359712	0	0	1	0	1
36	P081	2	38	0.109974	1.56152	8.55593	0.369159	0.102669	0.0705882	0.0899281	0	0	0	0	1
24	P084	1	67	3.06905	1.11857	0.186441	1.91589				1	1	0	0	1
37	P090	2	47	0.153453	1	3.15593	0.299065	0.0533881	0.0588235	0.0431655	0	0	0	0	1
2	P095	2	44	0.127877	0.704698	0.291525	0.495327	0.036961	0.102941	0.0611511	0	0	0	0	1
3	P100	2	53	0.104859	0.467562	0.135593	0.71028	0.0513347	0.164706	0.0647482	0	0	0	0	1
4	P102	2	54	0.299233	0.465324	0.301695	0.397196	0.0225873	0.138235	0.0719424	0	0	0	0	1
11	P104	2	42	0.179028	0.315436	0.125424	0.275701	0.0225873	0.0705882	0.0539568	0	0	0	0	0
5	P105	2	57	0.345269	0.50783	0.0813559	0.214953	0.0225873	0.0617647	0.0719424	0	0	0	0	1
6	P117	2	44	0.153453	0.711409	0.128814	0.191589	0.0287474	0.05	0.125899	0	0	0	0	1
38	P119	2	45	0.485934	2.61969	10.2305	0.560748	0.0533881	0.0882353	0.111511	0	0	0	0	1
12	P122	1	44	1.11765	0.409396	0.450847	0.742991	0.0451745	0.164706	0.115108	0	0	0	0	0
27	P125	2	72	0.429668	0.767338	0.362712	5.26168				0	0	0	0	1
13	P132	2	47	0.480818	0.33557	7.77627	0.425234	0.0513347	0.138235	0.0935252	0	0	0	0	0
7	P133	2	39	0.15601	0.606264	0.145763	0.32243	0.123203	0.120588	0.122302	0	0	0	0	1
8	P142	2	46	0.0485934	0.64877	0.152542	0.14486	0.026694	0.0647059	0.0827338	0	0	0	0	1
39	P154	2	58	2.00461	0.918072	8.05556	0.759887	0.276423	0.22314	0.355556	0	0	0	0	1
14	P158	2	41	0.718894	0.706024	0.111111	0.344633	0.252033	0.140496	0.6	0	0	0	0	0
15	P159	2	43	0.435484	0.86988	0.111111	0.437853	0.317073	0.118457	0.222222	0	0	0	0	0
45	P162	2	43								0	0	0	0	1
40	P165	2	58	0.40553	0.626506	1.01768	0.601695	0.243902	0.168044	0.427778	0	0	0	0	1
46	P179	2	46								0	0	1	0	1
9	P194	2	54	0.108295	0.436145	0.14899	0.740113	0.195122	0.0964187	0.366667	0	0	0	0	1
10	P197	2	54	0.108295	0.559036	0.126263	0.435028	1.30894	0.344353	0.366667	0	0	0	0	1
20	P204	2	63			S80	0	0	0	0	0	0	0	0	1
16	P206	2	60	0.0921659	0.739759	3.7197	0.262712	0.504065	0.112948	0.205556	0	0	0	0	0
17	P214	2	60	0.691244	0.607229	0.179293	0.387006	0.203252	0.247934	0.305556	1	0	0	0	0
47	P219	2	63								0	0	0	0	0
48	P235	2	49								0	0	0	0	0
49	P253	2	51								0	0	0	0	0
50	P269	2	43								0	0	0	0	0
41	P31	2	50								0	0	0	0	1

## Sheet: ALL HC （array）
num	sex	age	AMA-M2	dsDNA	SSA(LIA)	SSB(LIA)	Scl-70(LIA)
N007	f	47	neg	neg	neg	neg	neg
N010	f	40	neg	neg	neg	neg	neg
N012	f	48	neg	neg	neg	neg	neg
N014	f	45	neg	neg	neg	neg	neg
N016	f	38	neg	neg	neg	neg	neg
N018	f	36	neg	neg	neg	neg	neg
N034	f	37	neg	neg	neg	neg	neg
N035	f	58	neg	neg	neg	neg	neg
N048	f	42	neg	neg	neg	neg	neg
N059	f	42	neg	neg	neg	neg	neg
N061	f	49	neg	neg	neg	neg	neg
N064	f	46	neg	neg	neg	neg	neg
N068	f	37	neg	neg	neg	neg	neg
N072	f	47	neg	neg	neg	neg	neg
N083	f	45	neg	neg	neg	neg	neg
N089	f	39	neg	neg	neg	neg	neg
N091	f	43	neg	neg	neg	neg	neg
N097	f	43	neg	neg	neg	neg	neg
N102	f	50	neg	neg	neg	neg	neg
N103	f	45	neg	neg	neg	neg	neg
N115	f	38	neg	neg	neg	neg	neg
N118	f	49	neg	neg	neg	neg	neg
N120	f	39	neg	neg	neg	neg	neg
N122	f	38	neg	neg	neg	neg	neg
N124	f	43	neg	neg	neg	neg	neg
N162	f	41	neg	neg	neg	neg	neg
N163	f	49	neg	neg	neg	neg	neg
N165	f	37	neg	neg	neg	neg	neg
N171	f	46	neg	neg	neg	neg	neg
N172	f	39	neg	neg	neg	neg	neg
N173	f	44	neg	neg	neg	neg	neg
N177	f	42	neg	neg	neg	neg	neg
N179	f	59	neg	neg	neg	neg	neg
N186	f	55	neg	neg	neg	neg	neg
N189	f	43	neg	neg	neg	neg	neg
N011	m	51	neg	neg	neg	neg	neg
N041	m	51	neg	neg	neg	neg	neg
N075	m	44	neg	neg	neg	neg	neg
N076	f	38	neg	neg	neg	neg	neg
N077	m	70	neg	neg	neg	neg	neg
N078	m	34	neg	neg	neg	neg	neg
N079	m	39	neg	neg	neg	neg	neg
N080	f	32	neg	neg	neg	neg	neg
N081	m	38	neg	neg	neg	neg	neg
N082	m	33	neg	neg	neg	neg	neg
N084	m	42	neg	neg	neg	neg	neg
N085	m	42	neg	neg	neg	neg	neg
N086	f	33	neg	neg	neg	neg	neg
N087	m	43	neg	neg	neg	neg	neg
N088	f	35	neg	neg	neg	neg	neg
N090	m	36	neg	neg	neg	neg	neg
N092	m	25	neg	neg	neg	neg	neg
N093	f	30	neg	neg	neg	neg	neg
N094	f	34	neg	neg	neg	neg	neg
N095	f	31	neg	neg	neg	neg	neg
N096	m	26	neg	neg	neg	neg	neg
N098	m	44	neg	neg	neg	neg	neg
N129	f	28	neg	neg	neg	neg	neg
N001	m	43	neg	neg	neg	neg	neg
N002	f	37	neg	neg	neg	neg	neg
N003	f	23	neg	neg	neg	neg	neg
N004	m	44	neg	neg	neg	neg	neg
N005	f	23	neg	neg	neg	neg	neg
N006	f	34	neg	neg	neg	neg	neg
N008	f	32	neg	neg	neg	neg	neg
N009	f	30	neg	neg	neg	neg	neg
N013	f	53	neg	neg	neg	neg	neg
N015	m	44	neg	neg	neg	neg	neg
N017	f	30	neg	neg	neg	neg	neg
N019	m	49	neg	neg	neg	neg	neg
N020	m	34	neg	neg	neg	neg	neg
N021	f	23	neg	neg	neg	neg	neg
N022	f	21	neg	neg	neg	neg	neg
N023	f	37	neg	neg	neg	neg	neg
N024	m	36	neg	neg	neg	neg	neg
N025	f	30	neg	neg	neg	neg	neg
N026	m	39	neg	neg	neg	neg	neg
N027	f	26	neg	neg	neg	neg	neg
N028	f	28	neg	neg	neg	neg	neg
N029	m	45	neg	neg	neg	neg	neg
N030	m	47	neg	neg	neg	neg	neg
N031	m	34	neg	neg	neg	neg	neg
N032	f	33	neg	neg	neg	neg	neg
N033	m	47	neg	neg	neg	neg	neg
N036	f	36	neg	neg	neg	neg	neg
N037	f	43	neg	neg	neg	neg	neg
N038	m	42	neg	neg	neg	neg	neg
N039	f	45	neg	neg	neg	neg	neg
N040	m	29	neg	neg	neg	neg	neg
N042	f	21	neg	neg	neg	neg	neg
N043	m	26	neg	neg	neg	neg	neg
N044	m	46	neg	neg	neg	neg	neg
N045	f	19	neg	neg	neg	neg	neg
N046	f	31	neg	neg	neg	neg	neg
N047	m	39	neg	neg	neg	neg	neg
N049	f	35	neg	neg	neg	neg	neg
N050	f	27	neg	neg	neg	neg	neg
N051	m	32	neg	neg	neg	neg	neg
N052	f	34	neg	neg	neg	neg	neg
N053	f	40	neg	neg	neg	neg	neg
N054	f	34	neg	neg	neg	neg	neg
N055	f	44	neg	neg	neg	neg	neg
N056	m	38	neg	neg	neg	neg	neg
N057	f	30	neg	neg	neg	neg	neg
N058	f	30	neg	neg	neg	neg	neg
N060	m	35	neg	neg	neg	neg	neg
N062	m	37	neg	neg	neg	neg	neg
N063	m	40	neg	neg	neg	neg	neg
N065	m	37	neg	neg	neg	neg	neg
N066	m	27	neg	neg	neg	neg	neg
N067	m	26	neg	neg	neg	neg	neg
N069	m	40	neg	neg	neg	neg	neg
N070	f	35	neg	neg	neg	neg	neg
N071	m	44	neg	neg	neg	neg	neg
N073	m	46	neg	neg	neg	neg	neg
N074	m	37	neg	neg	neg	neg	neg
N099	f	32	neg	neg	neg	neg	neg
N100	f	31	neg	neg	neg	neg	neg
N101	f	33	neg	neg	neg	neg	neg
N104	m	33	neg	neg	neg	neg	neg
N105	f	35	neg	neg	neg	neg	neg
N106	m	32	neg	neg	neg	neg	neg
N107	m	24	neg	neg	neg	neg	neg
N108	m	33	neg	neg	neg	neg	neg
N109	f	27	neg	neg	neg	neg	neg
N110	m	26	neg	neg	neg	neg	neg
N111	f	23	neg	neg	neg	neg	neg
N112	f	32	neg	neg	neg	neg	neg
N113	m	42	neg	neg	neg	neg	neg
N114	m	46	neg	neg	neg	neg	neg
N116	m	30	neg	neg	neg	neg	neg
N117	f	32	neg	neg	neg	neg	neg
N119	f	30	neg	neg	neg	neg	neg
N121	f	28	neg	neg	neg	neg	neg
N123	m	35	neg	neg	neg	neg	neg
N125	m	41	neg	neg	neg	neg	neg
N126	f	32	neg	neg	neg	neg	neg
N127	m	30	neg	neg	neg	neg	neg
N128	f	25	neg	neg	neg	neg	neg
N130	m	30	neg	neg	neg	neg	neg
N131	f	30	neg	neg	neg	neg	neg
N132	m	39	neg	neg	neg	neg	neg
N133	m	36	neg	neg	neg	neg	neg
N134	m	31	neg	neg	neg	neg	neg
N135	m	33	neg	neg	neg	neg	neg
N136	f	27	neg	neg	neg	neg	neg
N137	m	26	neg	neg	neg	neg	neg
N138	m	30	neg	neg	neg	neg	neg
N139	m	27	neg	neg	neg	neg	neg
N140	m	40	neg	neg	neg	neg	neg
N141	f	38	neg	neg	neg	neg	neg
N142	f	29	neg	neg	neg	neg	neg
N143	f	28	neg	neg	neg	neg	neg
N144	m	42	neg	neg	neg	neg	neg
N145	f	33	neg	neg	neg	neg	neg
N146	f	31	neg	neg	neg	neg	neg
N147	f	36	neg	neg	neg	neg	neg
N148	f	33	neg	neg	neg	neg	neg
N149	m	35	neg	neg	neg	neg	neg
N150	m	27	neg	neg	neg	neg	neg
N151	f	30	neg	neg	neg	neg	neg
N152	f	35	neg	neg	neg	neg	neg
N153	f	26	neg	neg	neg	neg	neg
N154	m	27	neg	neg	neg	neg	neg
N155	f	32	neg	neg	neg	neg	neg
N156	f	25	neg	neg	neg	neg	neg
N157	m	32	neg	neg	neg	neg	neg
N158	m	29	neg	neg	neg	neg	neg
N159	f	30	neg	neg	neg	neg	neg
N160	m	25	neg	neg	neg	neg	neg
N161	f	27	neg	neg	neg	neg	neg
N164	f	27	neg	neg	neg	neg	neg
N166	m	38	neg	neg	neg	neg	neg
N167	m	29	neg	neg	neg	neg	neg
N168	m	28	neg	neg	neg	neg	neg
N169	m	36	neg	neg	neg	neg	neg
N170	f	36	neg	neg	neg	neg	neg
N174	f	27	neg	neg	neg	neg	neg
N175	f	35	neg	neg	neg	neg	neg
N176	f	34	neg	neg	neg	neg	neg
N178	m	40	neg	neg	neg	neg	neg
N180	m	62	neg	neg	neg	neg	neg
N181	f	26	neg	neg	neg	neg	neg
N182	m	25	neg	neg	neg	neg	neg
N183	f	30	neg	neg	neg	neg	neg
N184	f	29	neg	neg	neg	neg	neg
N185	m	27	neg	neg	neg	neg	neg
N187	f	33	neg	neg	neg	neg	neg
N188	f	30	neg	neg	neg	neg	neg
N190	f	34	neg	neg	neg	neg	neg
N191	m	31	neg	neg	neg	neg	neg
N192	m	43	neg	neg	neg	neg	neg
N193	m	31	neg	neg	neg	neg	neg
N194	f	28	neg	neg	neg	neg	neg
N195	f	30	neg	neg	neg	neg	neg
N196	m	38	neg	neg	neg	neg	neg

## Sheet: SS (array)
	num	age	sex	CLIA-dsDNA cutoff<30	CLIA-Sm cutoff<20	CLIA-RNP 70 cutoff<20	CLIA-SSA cutoff<20	CLIA-SSB cutoff<20	CLIA-Jo-1 cutoff<20	CLIA-scl70 cutoff<20
12	SS040	68	f	2.05	<3.50	<2.00	>200	>400	<2.00	<2.00
9	SS035	65	f	6.21	<3.50	8.02	>200	8	<2.00	<2.00
2	SS356	61	m	2.99	<3.50	3.78	109	>400	<2.00	3.37
20	SS153	61	f	4.86	<3.50	4.32	>200	>400	2.31	<2.00
13	SS042	60	f	122	<3.50	4.46	>200	>400	<2.00	2.26
38	SS354	60	f	138	<3.50	2.85	>200	>400	<2.00	<2.00
16	SS081	59	f	6.09	<3.50	3.55	>200	<2.00	<2.00	<2.00
18	SS093	58	m	25.2	<3.50	2.67	>200	125	<2.00	<2.00
31	SS227	58	f	4.74	<3.50	<2.00	>200	>400	<2.00	<2.00
26	SS380	57	f	3.49	<3.50	<2.00	>200	>400	<2.00	<2.00
3	SS015	55	f	6.27	<3.50	4.55	>200	>400	2.25	3.13
14	SS355	54	f	10.2	<3.50	2.63	>200	359	<2.00	124
36	SS297	54	f	62.8	<3.50	<2.00	>200	>400	<2.00	<2.00
6	SS021	53	f	2.03	<3.50	<2.00	>200	251	<2.00	<2.00
37	SS348	53	f	9.63	<3.50	6.06	>200	394	<2.00	<2.00
19	SS374	52	f	7.48	<3.50	2.21	>200	>400	<2.00	<2.00
24	SS182	51	f	<2.00	<3.50	5.44	>200	>400	<2.00	<2.00
33	SS233	51	f	4.52	<3.50	<2.00	>200	>400	<2.00	<2.00
40	SS371	51	f	3.51	<3.50	<2.00	>200	>400	<2.00	6.26
35	SS265	50	f	2.28	<3.50	<2.00	>200	>400	<2.00	<2.00
15	SS087	49	f	4.54	<3.50	3.5	>200	49.9	<2.00	<2.00
17	SS088	48	f	3.96	<3.50	2.9	>200	92.2	<2.00	<2.00
4	SS016	45	f	12.8	<3.50	2.59	>200	>400	<2.00	<2.00
7	SS024	45	f	3.65	<3.50	<2.00	>200	196	<2.00	<2.00
8	SS034	45	f	46	<3.50	2.32	>200	>400	<2.00	4.37
11	SS039	45	m	2.12	<3.50	<2.00	157	>400	9.97	<2.00
23	SS176	45	f	26.2	<3.50	<2.00	>200	>400	<2.00	<2.00
27	SS210	45	f	4.77	<3.50	<2.00	>200	>400	<2.00	<2.00
29	SS218	45	f	73.9	<3.50	<2.00	>200	>400	<2.00	<2.00
5	SS017	44	f	2.32	<3.50	<2.00	>200	3.36	<2.00	<2.00
10	SS038	42	f	4.47	<3.50	4.24	>200	20	<2.00	<2.00
25	SS188	40	f	2.68	<3.50	<2.00	>200	>400	<2.00	<2.00
1	SS003	37	f	4.56	<3.50	2.41	>200	>400	<2.00	<2.00
21	SS154	35	f	6.63	<3.50	<2.00	>200	>400	<2.00	<2.00
39	SS360	35	f	4.67	<3.50	<2.00	>200	>400	<2.00	<2.00
22	SS167	34	m	5.76	<3.50	11.6	>200	<2.00	<2.00	<2.00
34	SS255	34	f	3.42	<3.50	>400	>200	16.9	<2.00	2.5	1
28	SS243	33	f	3.7	<3.50	3.52	>200	>400	<2.00	<2.00
32	SS230	33	f	27.3	<3.50	<2.00	>200	>400	<2.00	<2.00
41	SS271	31	f	106	<3.50	4.84	>200	>400	<2.00	<2.00

## Sheet: PSS（blot）
	num	age	sex	CLIA-dsDNA cutoff<30	CLIA-Sm cutoff<20	CLIA-RNP 70 cutoff<20	CLIA-SSA cutoff<20	CLIA-SSB cutoff<20	CLIA-Jo-1 cutoff<20	CLIA-scl70 cutoff<20
4	SS016	45	f	12.8	<3.50	2.59	>200	>400	<2.00	<2.00
13	SS042	60	f	122	<3.50	4.46	>200	>400	<2.00	2.26
14	SS355	54	f	10.2	<3.50	2.63	>200	359	<2.00	124
18	SS093	58	m	25.2	<3.50	2.67	>200	125	<2.00	<2.00
19	SS374	52	f	7.48	<3.50	2.21	>200	>400	<2.00	<2.00
20	SS153	61	f	4.86	<3.50	4.32	>200	>400	2.31	<2.00
29	SS218	45	f	73.9	<3.50	<2.00	>200	>400	<2.00	<2.00
31	SS227	58	f	4.74	<3.50	<2.00	>200	>400	<2.00	<2.00
35	SS265	50	f	2.28	<3.50	<2.00	>200	>400	<2.00	<2.00
39	SS360	35	f	4.67	<3.50	<2.00	>200	>400	<2.00	<2.00
	SS001	29	f	8.68	<3.50	3.05	>200	148	<2.00	<2.00
	SS008	58	f	6.06	<3.50	3.29	>200	292	<2.00	<2.00
	SS009	31	f	3.72	<3.50	20.8	>200	96.6	<2.00	<2.00
	SS011	56	f	10.8	<3.50	<2.00	>200	220	<2.00	<2.00
	SS025	37	f	6.16	<3.50	3.89	>200	26.9	<2.00	<2.00
	SS039	45	m	2.12	<3.50	<2.00	157	>400	9.97	<2.00
	SS044	41	f	16.9	<3.50	3.82	>200	>400	<2.00	<2.00
	SS045	44	f	5.99	<3.50	2.17	>200	32.7	<2.00	<2.00
	SS093	58	m	25.2	<3.50	2.67	>200	125	<2.00	<2.00
	SS094	52	f	22.4	<3.50	3.19	>200	154	<2.00	<2.00
	SS096	49	f	3.34	<3.50	3.35	>200	104	<2.00	<2.00
	SS194	39	f	4.65	<3.50	3.04	>200	37.3	<2.00	<2.00
	SS239	47	f	4.76	<3.50	4.55	>200	>400	<2.00	<2.00
	SS285	34	f	<2.00	<3.50	5.42	>200	54.5	<2.00	<2.00
	SS332	44	f	3.4	<3.50	<2.00	>200	>400	<2.00	<2.00
	SS338	31	m	2.37	<3.50	<2.00	>200	163	<2.00	<2.00
SS021	SS21	44	f	2.03	<3.50	<2.00	>200	251	<2.00	<2.00
SS024	SS24	42	f	3.65	<3.50	<2.00	>200	196	<2.00	<2.00

## Sheet: NC （blot）
	num	sex	age
19	N173	f	44
21	N165	f	37
22	N061	f	49
23	N064	f	46
29	N091	f	43
30	N097	f	43
32	N115	f	38
34	N120	f	39
35	N122	f	38
36	N163	f	49
37	N171	f	46
40	N186	f	55
	N006	f	34
	N008	f	32
	N065	m	37
	N019	m	49
	N101	f	33
	N002	f	37
	N144	m	42
	N114	m	46
	N039	f	45
	N053	f	40
	N147	f	36
	N152	f	35
	N175	f	35
	N037	f	43
	N055	f	44
	N023	f	37

## Sheet: PBC（blot）
	num	sex	age	SS-A	Ro-52	SS-B	Scl-70	dsDNA	AMA-M2
8	P102	2	54	0	0	0	0	0	1
10	P117	2	44	0	1	0	0	0	1
12	P070	2	67	0	1	0	0	0	0
14	P204	2	63	0	0	0	0	0	1
6	P059	2	47	0	0	0	0	0	1
8	P084	1	67	0	0	0	0	0	1
10	434、1127	F	52	0	0	0	0	0	1
5	P044	2	34	0	0	0	0	0	1
9	P071	2	41	0	0	0	1	0	1
10	P081	2	38	0	0	0	0	0	1
10	P179	2	46	640	0	0	0	0	1
12	P235	2	49	1280	0	0	0	0	0
4	P040/205	1	74	1	1	0	0	0	1
13	P194	2	54	0	0	0	0	0	1
17	P156	2	43	0	0	0	0	0	1
12	P070	2	67	0	1	0	0	0	0
15	P108/126	2	42	0	0	0	0	0
1	P009	2	41	0	1	0	0	0	1
4	P031	2	50	0	0	0	0	0	1
14	P165	2	58	0	0	0	0	0	1
19	696	F	56	0	1	0	0	0	1
1	P064	2	42	0	0	1	0	0	1
3	P098	2	74	0	0	0	0	0	1
4	P123	2	71	0	0	0	0	0	1
12	P235	2	49	0	0	0	0	0	0
15	P347	2	33	0	0	0	0	0	1
18	P201	2	60	0	0	0	0	0	1
19	P034	2	46	0	0	0	0	0	1
