# Supplementary material for: Retrospective screening of serum IgG glycosylation biomarker for primary Sjögren’s syndrome using lectin microarray
Source: PeerJ. 2023 Feb 22;11:e14853. doi: 10.7717/peerj.14853 (PMC9961092; doi:10.7717/peerj.14853)
Supplement: Supplemental Information 7 [file peerj-11-14853-s007.xlsx]

## Sheet: SL（SLE）
				orin1		orin2		orin3		orin4		orin5		orin6		orin7		orin8		orin9		orin10		orin11		orin12		orin13		orin14		orin15		orin16		orin17		orin18		orin19		orin20		orin21		orin22		orin23
				1		2		3		4		5		6		7		8		9		10		11		12		13		14		15		16		17		18		19		20		21		22		23
Column	Row	Name	ID	SL261F635 Median	SL261B635 Median	SL262F635 Median	SL262B635 Median	SL263F635 Median	SL263B635 Median	SL264F635 Median	SL264B635 Median	SL265F635 Median	SL265B635 Median	SL266F635 Median	SL266B635 Median	SL267F635 Median	SL267B635 Median	SL268F635 Median	SL268B635 Median	SL269F635 Median	SL269B635 Median	SL270F635 Median	SL270B635 Median	SL271F635 Median	SL271B635 Median	SL272F635 Median	SL272B635 Median	SL273F635 Median	SL273B635 Median	SL274F635 Median	SL274B635 Median	SL275F635 Median	SL275B635 Median	SL276F635 Median	SL276B635 Median	SL277F635 Median	SL277B635 Median	SL278F635 Median	SL278B635 Median	SL279F635 Median	SL279B635 Median	SL280F635 Median	SL280B635 Median	SL281F635 Median	SL281B635 Median	SL282F635 Median	SL282B635 Median	SL283F635 Median	SL283B635 Median
1	1	LTL	1	6743.89	2945	754.929	335	2590.73	920	1280.64	695	3177.43	1634	2306.84	933	2685.36	1524	3202.66	1730	4310.87	1842	3068.08	1493	4321.39	2313	2576.01	1483	4516.95	1801	351.581	371	1153.73	526	5167.9	962	452.277	433	1105.94	718	744.976	798	1975.51	949	613.56	848	1140.08	1167	2910.78	1290
2	1	LTL	1	6628.23	2793	815.912	338	2849.38	972	1259.62	673	3133.27	1613	2262.68	944	2660.12	1467	3307.81	1859	3974.41	1826	3053.36	1546	3844.04	2203	2683.26	1485	3764.13	1655	331.954	359	1219.44	498	5000.64	923	750.097	428	1132.4	698	657.081	751	1821.05	881	611	822	1023.17	1154	3127.54	1276
3	1	LTL	1	5995.27	2550	702.357	316	2937.7	966	1261.72	671	3295.19	1655	1833.7	869	2578.11	1425	3175.33	1782	3961.8	1849	2971.35	1491	3869.27	2151	2996.58	1436	3675.81	1649	305.5	335	1204.93	473	4896.53	917	639.161	439	1059.01	668	830.312	752	1827.88	820	660.495	816	1013.78	1024	2668.43	1184
4	1	PSA	2	4940.54	2479	2099.6	305	3969.62	1009	4557.04	671	4622.46	1685	2840.94	786	4437.76	1484	6881.1	1590	6949.08	1914	6115.39	1279	4168.42	2163	5793.46	1284	10871.2	1888	987.466	344	2118.24	470	7766.5	945	5350.46	535	2367.9	666	3898.37	770	2656.75	762	2852.68	837	2236.91	982	4034.95	1166
5	1	PSA	2	4967.47	2434	2145.77	294	4023.49	1006	4169.7	649	4109.42	1564	2590.83	724	4582.7	1505	7803.28	1501	6695.12	1917	5717.79	1104	4450.59	2150	5309.93	1137	10523.7	1917	1069.2	348	1896.56	452	7457.5	930	4210.73	529	2298.49	633	2943.37	765	2764.23	717	2825.81	832	2254.83	978	4064.06	1212
6	1	PSA	2	4650.67	2445	1922.6	288	3955.51	985	3999.12	628	3926.01	1535	2256.08	685	4667.35	1509	7598.07	1401	6116.68	1911	6161.57	960	3949.1	2129	5140.62	1017	10288.9	1907	1149.81	359	1850.66	436	7655.66	926	4321.57	534	2339.91	628	4518.61	768	2781.03	727	2875.07	836	2290.65	983	3962.18	1207
7	1	LCA	3	4533.61	2464	1678.24	272	4794.32	964	3524.64	591	4739.02	1464	2406.19	664	4489.6	1503	10885.4	1302	5615.95	1861	4524.58	812	3869.99	2046	4311.28	919	9364.05	1850	1198.51	389	1833.76	434	5267.06	906	1542.42	529	2063.41	593	3577.26	729	1722.94	760	2127.39	807	1893.17	982	2816.34	1209
8	1	LCA	3	4451.22	2493	1818.19	274	4515.55	977	3522.38	577	5102.43	1468	2253.83	634	5351.85	1560	9893.37	1214	6050.46	1874	4275.16	748	3856.45	2002	4206.32	845	8376.52	1854	1261.35	404	1746.93	444	5259.07	875	1610.97	533	2103.4	538	3319.05	731	1801.77	754	2247.36	787	1919.45	1014	2913.45	1193
9	1	LCA	3	4473.8	2496	1801.26	272	4600.2	974	3320.36	553	4789.81	1464	2346.37	639	5411.67	1658	9523.18	1057	5938.73	1818	4381.25	692	3515.61	1974	3970.44	822	8808.77	1820	1243.07	422	1728.65	442	5275.06	862	1639.53	531	1940.02	479	3396.74	724	1889.74	756	2282.78	779	1984.57	1062	2988.86	1211
10	1	UEA I	4	2947.86	2512	374.401	282	1880.81	964	1009.78	551	1709.03	1558	710.261	623	1564.78	1636	1363.26	879	1710.13	1808	1221.21	670	1873.11	1978	958.026	809	3263.89	1898	494.99	408	597.07	455	2631.92	868	465.137	538	551.808	451	622.108	670	1098.8	769	623.072	723	1143.1	1087	1316.44	1227
11	1	UEA I	4	3007.32	2541	354.58	282	1652.87	987	1032.91	554	1812.54	1644	715.766	598	1713.43	1711	1257.55	719	1671.59	1784	1126.51	618	1872	1998	984.454	803	3248.48	1905	507.51	419	622.108	457	2591.48	831	474.767	540	604.774	449	643.295	697	1180.66	773	614.404	706	1215.33	1121	1361.7	1242
12	1	UEA I	4	3093.21	2586	355.681	269	1712.33	992	1065.94	568	1875.31	1655	687.136	568	1564.78	1651	1167.25	622	1687.01	1749	1121	604	1961.2	2052	974.544	746	3422.46	1885	516.177	434	622.108	454	2720.52	745	547.956	563	729.966	447	714.558	710	1299.11	803	644.258	740	1203.77	1125	1434.89	1263
13	1	AAL	5	5403.8	2620	2598.71	334	2916.73	1044	3101.05	577	3865.61	1730	2274.19	528	3881.18	1642	2858.32	591	4162.86	1740	2380.63	595	4347.18	2159	3563.16	729	10771.3	1879	716.082	510	1114.11	450	13457.4	622	2440.86	607	5260.66	432	7922.34	766	4389.18	809	3969.35	823	2283.65	1161	14743.3	1202
14	1	AAL	5	5363.56	2632	1311.04	260	3108.84	1064	2876.49	525	3944.79	1770	2253.42	453	3925.32	1590	2602.6	566	4305.65	1670	2240.44	575	4471.8	2215	3294.46	718	10802.4	1852	732.439	534	1410.35	432	13392.9	535	2603.52	617	4136.55	431	13253.9	771	4352.83	824	4053.86	834	2482.66	1187	9823.41	1266
15	1	AAL	5	5377.84	2544	1495.36	248	2990.72	1058	2992.02	487	3985.03	1765	1908.14	362	3250.33	1505	2483.18	552	4105.75	1578	2359.86	552	4487.37	2183	3447.63	703	10446.7	1776	781.511	547	1303.12	405	15000.5	489	3083.33	611	4490.96	414	25789.9	770	4304.67	838	4291.95	817	3075.15	1157	9936.09	1305
1	2	LAL	6	5372.11	2854	934.387	361	3295.14	927	2333.49	693	2922.13	1623	2741.2	926	4431.52	1499	2567.71	1771	4194.83	1840	2302.51	1435	4466.22	2318	3292.66	1494	6594	1750	749.31	390	1425.68	587	4060.11	1047	810.884	552	974.766	717	1391.58	795	1640.71	952	1287.37	855	3045.55	1193	2079.31	1293
2	2	LAL	6	5084.6	2624	956.693	373	3300.1	995	2391.73	677	2826.71	1625	2840.34	940	4450.11	1405	2670.56	1862	4295.21	1806	2405.36	1465	4145.26	2125	3008.87	1475	6605.15	1715	725.628	387	1464.52	571	4032.63	1004	790.991	522	1074.23	681	1339.47	737	1609.45	885	1247.59	822	3081.55	1156	2100.15	1247
3	2	LAL	6	4541.81	2390	915.798	364	3293.9	971	2345.88	671	2852.73	1676	2628.43	834	4215.89	1477	2643.3	1767	4225.81	1865	2265.33	1432	4208.46	2165	3231.94	1443	6606.39	1586	718.05	383	1526.09	538	3884.86	969	835.514	533	987.081	667	1251.38	736	1563.04	812	1339.47	831	2955.56	1027	2108.68	1213
4	2	TL	7	2256.87	2282	304.615	355	1102.27	1132	713.908	713	1872.7	1948	1055.16	831	1518.89	1723	1379.66	1660	1919.81	2113	999.681	1306	1985.75	2378	1298.01	1378	1928.18	2043	329.268	324	524.434	476	1069.22	986	617.826	585	736.362	697	828.557	784	743.546	722	808.203	816	791.44	885	1205.72	1196
5	2	TL	7	2296.65	2273	326.597	366	1143.09	1119	652.148	688	1738.71	1810	913.844	775	1547.15	1733	1313.72	1601	1899.92	2164	980.839	1151	2081.01	2335	1082.38	1233	1889.45	2092	340.044	324	487.316	450	1056.05	984	607.05	581	754.322	671	811.795	800	701.64	664	815.387	817	785.453	878	1248.82	1233
6	2	TL	7	2409.7	2352	410.34	385	1148.32	1092	683.551	667	1721.96	1731	954.669	739	1587.97	1734	1248.82	1498	1899.92	2169	751.593	982	1996.22	2329	986.073	1099	1867.47	2069	384.345	346	464.567	438	1103.94	958	617.826	586	684.877	640	845.32	794	680.088	667	815.387	811	772.283	885	1279.95	1265
7	2	MAA	8	3103.38	2468	361.939	295	1693.53	940	1247.22	609	1441.64	1443	641.953	681	1592.04	1467	1491.78	1341	1754.67	1908	849.823	796	1940.53	2105	947.645	943	1695.98	1829	425.481	422	482.757	463	2318.32	934	351.84	490	508.213	565	772.775	705	727.317	739	550.034	766	945.513	974	965.514	1128
8	2	MAA	8	3077.71	2486	336.261	293	1687.42	970	1246	604	1474.66	1456	637.062	653	1611.61	1517	1386.62	1228	1819.48	1899	829.036	731	1897.73	2051	893.843	876	1784.02	1836	443.664	454	495.485	473	2475.61	916	360.022	502	481.848	519	790.958	706	762.774	746	550.943	752	937.33	986	973.696	1141
9	2	MAA	8	2998.23	2453	364.385	294	1683.75	958	1248.45	575	1463.65	1510	639.507	636	1744.89	1645	1358.49	1092	1829.26	1867	832.704	706	1917.3	2025	893.843	841	2109.27	1842	457.301	476	488.212	465	2451.97	870	382.751	511	478.211	462	766.411	709	760.047	746	550.943	748	1009.15	1035	990.061	1139
10	2	SNA	EBL	4702.08	2452	1001.37	286	2982.33	977	2247.32	549	3379.3	1540	1879.81	596	2965.69	1654	5412.76	839	3904.31	1786	2151.28	636	3603.39	1956	4041.33	842	6150.34	1808	803.208	492	916.336	458	8700.41	812	1093.86	511	2257.34	433	1796.12	679	3877.68	748	2973.52	739	1905.77	1068	5255.23	1069
11	2	SNA	EBL	4627.8	2481	973.196	282	3130.88	982	2505.98	568	3637.96	1597	2467.56	564	3024.59	1651	5706	689	3170.57	1755	3935.04	592	3095.02	1993	4110.47	815	5817.41	1790	769.27	494	945.923	450	8908.39	770	1306.19	513	2152.04	426	3537.42	723	3728	749	3229.37	725	1850.95	1092	5427.53	1071
12	2	SNA	EBL	4845.49	2522	986.002	271	3210.27	983	2847.88	584	4096.39	1633	2388.17	532	3159.05	1609	6100.4	614	3185.94	1706	4113.04	589	3576.5	2053	4230.84	779	7831.67	1775	761.438	519	964.198	439	9094.61	686	1569	527	2167.7	433	2899.56	697	3676.66	769	3610.52	742	1796.12	1096	4793.14	1167
13	2	SSA	10	5736.2	2630	2913.34	274	2560.61	1037	1900.89	578	3053.62	1732	1463.78	518	4089.45	1609	2318.67	584	6948.91	1730	2064.55	599	4722.74	2195	2980.43	752	8058.94	1909	729.671	560	1484.3	437	3698.26	584	1007.17	545	1095.01	430	2248.9	712	2330.75	775	3712.24	789	5051.8	1127	3023.49	1289
14	2	SSA	10	6354.24	2662	2727.31	264	2540.27	1044	1792.12	515	3136.97	1760	1402.79	435	3684.87	1558	2401.01	565	6559.58	1671	1954.76	582	4905.71	2260	2689.7	739	7379.91	1858	767.602	569	1411.43	422	3938.82	527	1088.02	551	1108.98	430	2260.88	719	2408.61	788	4003.71	808	5777.48	1144	3023.49	1299
15	2	SSA	10	6089.95	2620	2592.12	254	2534.18	1053	1790.09	489	3516.13	1774	1403.81	363	3954.25	1488	2156.03	553	6674.45	1581	1749.42	546	4717.65	2213	2463.02	714	6996.68	1813	727.674	556	1370.5	388	3655.34	467	1040.11	534	991.194	387	2211.97	729	2305.8	783	4030.66	793	5900.25	1132	3029.48	1291
1	3	MAL II	11	2622.23	2678	367.331	449	1059.07	912	882.394	727	1137.93	1582	789.563	921	1135.93	1500	1407.44	1754	1216.79	1774	961.25	1424	1619.05	2226	1188.84	1451	1254.72	1861	333.354	401	456.853	602	2071.62	1084	365.854	509	525.567	719	628.637	750	676.922	905	608.209	808	1064.13	1174	886.778	1201
2	3	MAL II	11	2448.54	2473	365.335	432	1048.09	980	844.463	718	1096	1533	787.566	962	1058.07	1449	1617.06	1823	1215.79	1743	977.221	1467	1511.25	2168	1135.93	1471	1248.73	1777	321.283	400	490.281	592	1937.91	1018	361.211	497	541.352	678	613.78	706	662.065	835	599.852	796	1083.63	1140	878.42	1195
3	3	MAL II	11	2247.91	2342	340.38	417	1062.07	950	851.45	694	1089.02	1548	698.728	861	1074.04	1369	1411.43	1745	1207.8	1753	919.327	1401	1452.36	2095	1223.77	1431	1210.8	1691	325.926	402	463.353	561	1930.48	983	372.354	499	506.995	647	553.423	685	624.923	784	599.852	806	925.777	1011	879.349	1159
4	3	SNA-I	12	6313.22	2284	2124.09	380	10137.6	970	4485.64	684	6719.93	1625	3467.55	757	4317.7	1458	9179.88	1585	8408.44	1806	3222.21	1170	5575.89	2049	4208.81	1307	9977.56	1684	1447.49	424	1875.88	533	12487.6	997	1377.38	543	5895.64	693	2981.44	762	3550.06	728	4430.85	903	2376.31	933	4494.25	1190
5	3	SNA-I	12	6272.55	2262	2038.81	366	11393.2	960	4337.38	654	5871.08	1489	3437.37	707	4231.11	1436	8740.37	1497	8148.67	1803	3089.7	1007	6019.33	2015	4364.94	1162	10250.4	1779	1871.08	442	1833.62	500	12265.8	980	1334.15	524	3943.87	676	2737.47	771	3706.62	708	4550.92	896	2408.01	964	4334.8	1149
6	3	SNA-I	12	6441.79	2264	2074.23	383	9953.94	959	4322.95	618	6184.64	1461	3558.07	656	4203.56	1453	7850.85	1387	7339.18	1806	2735.46	869	5884.2	1979	4654.88	1065	10784.4	1787	1636.72	457	1783.67	478	13678.7	957	1395.63	524	4006.3	622	6278.88	756	3731.6	704	4210.89	834	2349.42	940	5110.9	1195
7	3	NPL	NPA	3065.09	2293	469.121	336	1248.04	881	689.139	579	1762.68	1371	1227.81	614	2014.31	1408	1449.09	1224	2222.95	1703	1011.58	708	2310.2	1886	1336.55	958	2034.54	1705	512.433	465	591.348	460	973.623	821	540.105	475	589.298	542	755.327	670	790.172	704	841.415	736	997.195	933	1240.09	1068
8	3	NPL	NPA	3029.68	2308	447.625	315	1232.86	900	658.792	567	1806.94	1398	1102.62	567	2009.25	1426	1361.84	1145	2139.49	1707	967.324	653	2102.82	1841	1265.74	885	1985.23	1718	519.607	464	567.776	473	917.255	816	541.129	484	571.875	480	753.277	683	814.769	696	831.167	723	1006.42	947	1261.61	1075
9	3	NPL	NPA	3058.77	2340	452.682	310	1226.54	903	643.618	547	1861.31	1464	1162.05	584	2216.63	1434	1291.03	996	2115.47	1664	963.531	651	2215.36	1839	1242.98	849	1975.11	1686	525.756	481	582.124	456	976.698	798	542.154	491	525.756	446	723.556	656	839.366	706	758.401	703	1082.26	961	1265.71	1075
10	3	ConA	14	9117.29	2393	6592.61	305	15816.2	925	18216.6	528	12594.4	1511	6821.75	573	9476.18	1485	25799	796	8802.57	1682	11934.6	621	5670.53	1874	21148.5	834	10372	1732	2870.58	493	3293.11	471	18614.2	787	2665.33	512	9570.94	433	4021.02	649	10163.7	728	13474.8	707	4314.38	1001	6290.85	1076
11	3	ConA	14	9302.26	2464	6480.8	287	16273.1	979	17202.1	534	11531.5	1554	5564.24	549	9752.25	1506	24240.5	678	8730.79	1664	12184.5	577	6116.38	1976	18200.1	806	10220.2	1725	2372.96	500	3319.14	465	17657	749	5536.91	517	9649.04	439	5686.09	685	10568.2	735	14470.1	693	3786.72	1046	5591.98	1160
12	3	ConA	14	9291.21	2494	6482.18	281	16546.4	953	17072.3	537	12659.3	1623	5758.87	517	9288.45	1417	24747.1	612	8661.77	1637	12678.6	589	5681.57	2048	25061.8	791	10806.9	1719	2849.56	506	3349.18	445	13936.4	650	7450.3	530	9159.43	430	9608.99	659	10724.4	736	14001.5	715	4269.33	1056	7857.8	1149
13	3	GNL	15	4152.97	2568	658.608	273	2260.55	923	1108.7	511	2627.24	1630	1561.68	465	3556.19	1386	1279.83	559	2782.55	1552	1361.79	557	2978.11	2132	1693.97	745	2814.18	1654	571.156	503	602.83	414	1089.18	520	715.222	526	837.831	446	900.158	635	1098.38	746	1078.96	710	1259.81	1043	1499.92	1142
14	3	GNL	15	4262.26	2627	634.161	271	2233.23	941	1065.56	466	2671.82	1643	1538.67	375	3433.96	1403	1292.77	524	2650.25	1507	1345.98	531	3052.89	2154	1581.81	722	2704.89	1498	590.569	530	638.591	405	1066.7	474	720.331	531	767.331	424	902.201	641	1135.16	739	1029.92	730	1259.81	1063	1523.42	1134
15	3	GNL	15	4247.88	2614	664.36	253	2178.58	945	1067	448	2666.07	1664	1448.07	327	3275.78	1390	1298.52	514	2530.89	1439	1287.02	501	3080.21	2129	1548.73	704	2558.22	1517	567.069	512	592.612	389	1046.27	432	693.765	535	738.722	393	923.658	653	1074.88	738	1027.88	720	1296.6	1056	1517.29	1149
1	4	HHL	AL	3269.94	2450	610.49	485	1318.91	858	831.793	661	1774.24	1508	1287.12	848	1556.75	1393	1739.9	1623	2040.05	1749	1484.25	1354	2369.46	1982	1613.98	1438	1993	1808	425.098	423	617.501	606	1035.55	1001	479.495	509	679.956	698	742.411	748	860.27	875	787.741	775	1116.13	1117	1268.24	1171
2	4	HHL	AL	3163.1	2302	558.344	425	1256.59	886	787.278	653	1683.94	1477	1324	878	1593.63	1412	1723.36	1692	2005.71	1731	1452.46	1378	2296.97	2020	1591.09	1485	1951.02	1764	457.333	435	620.523	605	990.217	930	476.473	483	666.86	647	641.677	679	842.138	806	756.514	762	1164.49	1081	1187.66	1162
3	4	HHL	AL	3013.02	2206	541.81	424	1208.26	861	848.327	628	1662.31	1496	1199.36	781	1527.5	1400	1700.47	1626	1991.72	1734	1443.55	1372	2305.87	1960	1603.81	1430	1891.25	1707	450.282	440	591.31	567	945.894	896	472.443	479	631.603	628	641.677	645	772.631	746	792.778	763	1016.41	969	1163.48	1103
4	4	CALSEPA	17	4435.61	2190	1802.23	408	5743.73	926	4524.15	693	3640.17	1576	3004.68	739	3467.37	1453	9646.66	1519	3311.71	1773	3383.12	1186	2681.93	2045	3260.3	1334	2996.11	1739	693.955	471	782.413	567	3579.49	1147	730.984	528	1073.85	635	1265.85	716	2276.61	720	1241.16	798	2269.75	1022	1258.31	1141
5	4	CALSEPA	17	4104.3	2168	1689.42	396	6263.55	942	4125.72	652	2967.55	1443	2656.22	688	3485.94	1476	8802.67	1431	3350.27	1772	3388.83	1051	2760.47	1994	2941.84	1219	3371.69	1788	694.641	459	724.812	533	3820.87	1111	727.555	503	1151.33	644	1262.42	718	1936.49	709	1291.22	793	1745.86	991	1389.28	1128
6	4	CALSEPA	17	4185.7	2204	1742.25	411	5902.25	952	4225.68	595	3177.47	1417	2444.87	640	3742.99	1464	8551.33	1352	3600.18	1788	2894.71	885	2683.36	1979	2540.55	1152	3403.11	1740	678.183	455	704.241	491	2923.25	1221	713.841	497	1064.25	602	1268.59	718	1694.43	693	1269.28	793	1397.51	928	1230.88	1092
7	4	AMA	18	2145.65	2259	298.508	371	763.3	971	841.433	611	953.624	1406	501.854	635	1038.77	1466	1123.91	1270	1139.94	1818	637.085	765	1281.18	1934	792.349	1020	1191.03	1835	349.909	457	390.032	474	1853.12	886	342.444	451	476.809	527	652.23	715	609.308	660	571.051	723	886.435	867	781.929	1043
8	4	AMA	18	2129.63	2262	304.518	340	777.323	989	811.381	597	978.666	1459	514.877	620	1102.88	1503	1000.7	1151	1132.93	1803	574.979	686	1290.2	1906	754.284	945	1197.04	1808	373.236	473	397.496	477	1809.26	858	346.176	464	438.552	477	583.181	721	600.91	672	575.717	714	869.64	885	750.204	1031
9	4	AMA	18	2205.76	2376	296.505	341	797.358	1001	843.436	595	1044.78	1506	484.825	605	1116.9	1496	970.653	1005	1125.92	1773	599.02	684	1289.19	1939	733.248	903	1218.07	1803	382.567	474	404.028	457	1857.78	827	359.24	483	410.56	438	621.438	697	587.847	686	530.928	693	906.963	903	729.676	1027
10	4	MNA-M	19	4349.58	2449	1479.48	351	4897.16	987	3580.92	583	6649.39	1565	2562.23	585	5589.37	1510	9670.34	781	4921.95	1742	20712.7	649	3054.01	2016	4216.31	909	7764.16	1867	1372.39	513	1631.95	463	4247.44	818	1369.4	536	2026.76	421	3327.54	694	2288.31	692	4575.62	725	2189.85	918	4494.07	1119
11	4	MNA-M	19	4555.18	2534	1901.01	329	5189.54	1008	3162.49	580	6584.3	1621	2407.25	563	5467.46	1498	9594.92	669	4531.42	1708	21026.8	624	3476.57	2094	4631.64	878	7206.26	1851	1488.74	517	1519.57	462	4150.98	774	1687.64	558	1972.06	419	3845.67	724	2470.3	699	4827.23	708	2132.17	931	4249.43	1129
12	4	MNA-M	19	4656.43	2583	1816.29	312	5324.88	1025	3405.28	579	6861.19	1703	2438.25	531	6148.31	1499	8110.27	603	3849.54	1657	23130.3	615	3259.61	2176	3859.87	859	7618.49	1829	1571.28	529	1554.38	447	4192.75	636	1594.16	571	1979.02	425	3521.47	707	2442.45	693	4429.43	723	2111.29	952	4328.99	1133
13	4	VFA	20	3337.48	2657	584.122	302	2123.62	1026	1675.08	550	1991.84	1759	752.643	474	1896.81	1429	1370.98	564	1749.83	1628	1184.72	589	2486	2189	1180.92	791	2314.95	1755	651.577	544	570.264	440	2957.24	548	528.537	553	680.465	453	958.643	681	1039.96	711	808.855	710	1304.22	975	1109.5	1113
14	4	VFA	20	3409.7	2683	562.582	287	2193.31	1033	1804.32	507	1963.97	1777	679.153	381	1857.53	1413	1395.05	538	1785.31	1570	1020	555	2497.41	2182	1055.47	738	2313.68	1709	614.13	546	569.194	420	2860.95	489	526.397	550	680.465	446	908.357	691	1033.54	715	810.995	721	1271.06	1002	1137.32	1123
15	4	VFA	20	3417.31	2680	511.899	263	2241.46	1033	1820.79	483	2067.87	1782	598.06	320	1853.73	1405	1354.5	517	1681.41	1504	1000.99	534	2465.73	2157	1037.74	722	2099.55	1701	607.711	525	528.537	407	2770.01	446	543.516	537	660.137	424	1001.44	679	965.062	712	800.295	708	1308.5	1001	1127.69	1119
1	5	VVA mannose	21	3084.04	2317	763.822	486	1755.41	949	1575.96	693	2083.25	1549	1595.51	879	2132.72	1467	4316.05	1717	3119.71	1844	2139.62	1440	2413.4	2074	2240.85	1494	3430.3	1895	596.617	490	860.754	692	2657.99	1069	559.675	570	832.123	735	1257.88	804	930.02	877	835.818	781	1198.77	1075	1299.44	1207
2	5	VVA mannose	21	2899.99	2160	755.769	467	1719.75	992	1608.17	703	1955.57	1521	1678.34	930	2070.6	1467	4150.4	1766	2897.69	1836	2401.9	1482	2164.93	2063	2129.27	1511	3469.41	1885	578.146	503	876.454	683	2707.86	1018	563.369	527	825.658	684	1199.7	732	941.103	809	833.047	787	1198.77	1049	1289.28	1185
3	5	VVA mannose	21	2760.8	2097	727.011	460	1656.48	960	1597.81	688	1888.85	1523	1510.39	829	2056.8	1449	4003.16	1713	2928.75	1848	2186.78	1399	2070.6	2032	2078.65	1447	3135.81	1821	589.228	491	838.588	659	2559.17	973	551.363	524	771.169	645	1264.35	709	893.078	735	873.683	769	1124.89	953	1251.42	1149
4	5	ASA	22	2126.1	2091	431.847	441	2924.58	942	1703.87	659	14099.1	1587	9910.02	763	1324.4	1443	1438.78	1547	1405.64	1773	17126.4	1180	1742.35	1990	3112.72	1312	4124.99	1618	1512.87	475	1865.91	603	4000.12	928	403.872	482	1456.39	623	813.393	670	1554.3	675	621.342	733	1636.2	843	2191.64	1104
5	5	ASA	22	2166.72	2148	426.502	425	2918.17	924	1694.25	633	12119.5	1462	9002.5	695	1320.12	1474	1424.88	1429	1377.85	1753	16774.7	1031	1754.11	1964	2866.86	1193	4521.56	1762	1468.63	450	1743.52	566	3844.79	891	389.751	468	1437.56	594	774.795	667	1645.61	683	611.928	715	1544.88	811	2129.51	1104
6	5	ASA	22	2246.88	2207	440.398	447	3102.03	1000	1675.01	593	12987.5	1480	8313.05	655	1353.26	1454	1397.09	1319	1371.43	1760	16384.5	884	1794.73	1954	2763.18	1143	4360.15	1777	1481.81	453	1675.74	526	4030.25	863	358.684	451	1400.84	561	809.627	664	1652.2	661	597.806	712	1552.41	789	2137.98	1037
7	5	GSL II	BSL II	3608.87	2275	492.192	395	1471.72	953	798.193	592	1829.53	1422	1013.53	590	1421.53	1368	1468.48	916	1884.58	1675	1094.48	745	2231.05	1888	1337.34	993	1717.81	1680	383.664	442	431.867	482	621.732	763	312.833	447	458.429	486	691.578	650	620.748	622	650.26	693	720.107	760	1027.04	978
8	5	GSL II	BSL II	3709.25	2385	467.906	366	1468.48	904	794.955	597	1839.24	1422	977.907	579	1594.77	1444	1319.53	829	1771.24	1653	1109.05	682	2237.53	1852	1474.96	956	1789.05	1682	384.647	450	445.64	486	596.154	755	307.915	450	422.03	434	581.398	637	660.098	621	658.131	676	693.546	764	997.525	961
9	5	GSL II	BSL II	3764.3	2435	492.192	367	1444.19	908	799.812	577	1889.43	1506	1011.91	564	1458.77	1394	1196.48	771	1789.05	1656	1032.96	662	2252.1	1891	1502.48	908	1785.81	1684	387.599	458	449.575	461	571.56	717	302.996	464	392.517	406	501.714	615	651.244	629	616.813	661	699.448	762	975.883	966
10	5	LEL	TL	2383.79	2523	691.024	360	2903.25	960	4096.58	552	4189.03	1560	884.51	588	2435.26	1418	1223.83	740	2866.08	1622	951.23	635	2637.33	1926	2388.56	899	7202.85	1753	1063.34	491	776.167	453	4496.41	731	494.779	510	1181.25	395	8715.78	673	2057.96	645	907.819	666	4596.24	782	3544.47	973
11	5	LEL	TL	2464.81	2528	687.211	349	2856.55	965	3931.69	544	4396.82	1658	872.119	545	2536.29	1449	1211.44	649	2890.86	1578	965.527	605	2465.76	2028	2117.87	837	7084.66	1744	1038.75	495	782.677	444	4416.12	704	405.806	522	1201.5	392	8738.21	693	2177.32	645	891.181	672	4557.9	801	3318.78	1002
12	5	LEL	TL	2355.2	2574	682.445	312	2867.03	968	3653.37	572	4312.94	1670	831.135	515	2560.12	1454	1171.4	587	2779.34	1624	917.87	594	2817.47	2106	2202.7	811	6977.91	1638	1030.07	522	730.595	420	4329.32	578	548.308	529	1247.08	422	8475.63	668	2093.41	645	915.776	670	4723.55	818	3459.11	1001
13	5	STL	PL	3286.94	2602	795.123	306	4084.62	995	5949.31	547	5467.11	1718	1043.92	438	2612.36	1487	1731.32	550	3666.54	1556	1383.77	578	4121.81	2123	2853.47	780	6505.9	1707	966.589	546	926.627	423	4497.43	482	374.647	518	1483.6	416	9297.08	687	2263.7	639	909.144	681	5850.32	825	3366	1087
14	5	STL	PL	3274.11	2607	802.818	302	4006.39	993	5871.08	501	5560.73	1745	820.772	352	2430.25	1471	1910.86	534	4100.01	1524	1247.83	547	3912.77	2135	2566.19	702	6522.57	1687	1019.04	555	900.818	398	4518.24	447	369.652	527	1514.41	407	9339.54	676	2217.91	643	899.153	707	5816.19	856	3538.33	1103
15	5	STL	PL	3193.32	2580	802.818	267	4170.55	1011	6041.65	474	5442.74	1734	890.025	314	2437.95	1422	1853.15	502	3879.43	1435	1286.3	525	4121.81	2112	2421.28	683	6364.83	1663	1093.97	537	968.255	379	5165.97	399	363.824	506	1704.23	405	9601.79	712	2281.18	656	895.823	683	6123.4	851	3604.94	1083
1	6	UDA	26	2203.56	2276	390.674	485	740.332	889	773.144	679	961.816	1393	742.383	805	1074.61	1455	1219.19	1596	1113.57	1654	905.42	1372	1527.83	1914	1085.89	1509	1255.08	1693	298.935	440	463.15	633	2004.06	995	323.647	456	430.466	595	489.456	680	542.068	729	479.89	628	983.695	984	637.728	959
2	6	UDA	26	2040.53	2093	399.902	486	720.849	878	810.058	677	952.588	1346	797.754	864	1253.03	1461	1306.35	1646	1136.13	1623	990.527	1375	1508.35	1940	1093.07	1474	1176.12	1687	332.416	450	472.716	652	1872.53	945	334.01	454	440.032	589	501.413	645	526.922	692	501.413	658	974.129	963	638.525	959
3	6	UDA	26	1913.38	1956	406.055	464	663.428	849	802.881	671	945.41	1300	607.031	773	1057.18	1418	1239.7	1538	1122.8	1638	877.734	1286	1439.65	1852	1034.62	1406	1160.74	1628	314.081	447	467.135	619	1772.09	871	318.067	439	428.872	559	500.616	637	487.064	622	521.342	658	962.969	867	634.539	917
4	6	PWM	PWA	1891.93	2033	421.882	493	651.451	901	753.145	660	1163.95	1575	568.887	733	1055.21	1418	1201.21	1478	1191.14	1791	796.441	1143	1408.62	1954	989.762	1375	1107.57	1706	332.335	458	478.629	629	1818.96	834	333.18	468	425.354	580	509.072	633	480.321	592	491.314	693	801.662	780	658.75	948
5	6	PWM	PWA	1933.21	2127	394.696	474	700.788	917	739.049	646	994.796	1433	538.68	674	1058.23	1432	1121.66	1349	1175.03	1785	742.07	1008	1452.93	1930	873.971	1272	1134.75	1730	294.281	429	480.321	605	1816.42	815	305.274	445	405.059	553	498.079	635	477.784	595	485.394	694	743.313	710	661.287	980
6	6	PWM	PWA	2007.72	2256	391.676	475	768.249	984	714.884	610	993.789	1466	506.46	648	1103.54	1443	1071.32	1264	1148.85	1777	644.402	858	1426.75	1913	841.751	1208	1205.23	1843	284.979	417	479.475	601	1745.39	792	295.972	451	392.375	507	465.945	628	455.797	583	482.012	676	717.944	702	645.219	951
7	6	WGA	28	2756.67	2242	661.127	430	1834.55	978	2069.66	570	4035.78	1457	1027.82	608	5410.89	1421	2473.02	1160	2702.75	1712	1079.59	733	3346.62	1828	2278.89	1108	5272.84	1683	422.942	444	762.437	563	4314.3	787	380.149	451	629.064	466	1807.31	651	1390.79	556	1311.62	683	2574.03	663	1461.4	947
8	6	WGA	28	2988.55	2412	652.499	400	1683.55	945	2202.32	583	4090.79	1475	1012.72	596	5546.78	1420	2346.84	1043	2571.17	1691	1027.82	680	3208.57	1821	2014.66	1047	5429.22	1686	460.03	457	761.011	553	4290.76	769	406.538	453	629.064	403	2086.9	643	1421.46	553	1203.21	673	2538.37	658	1384.37	943
9	6	WGA	28	3086.7	2469	674.069	405	1686.79	957	2255.16	590	4144.71	1573	984.68	585	5328.92	1424	2247.62	866	2483.81	1697	1006.25	655	3369.27	1838	2011.42	985	5217.83	1704	499.971	475	713.938	494	4409.16	749	381.575	457	608.381	373	2151.8	623	1326.6	560	1219.61	662	2681.73	651	1377.24	956
10	6	DSL	29	2884.69	2419	613.492	382	2435.34	885	5812.46	576	2102.4	1565	686.831	551	1816.03	1375	945.266	717	2761.3	1591	691.488	617	2350.36	1789	1217.67	935	3578.51	1703	531.436	507	518.111	430	3332.05	685	402.888	452	605.899	354	9115.92	609	1225.12	557	679.579	622	3794.51	650	3208.99	919
11	6	DSL	29	2934.75	2420	626.297	362	2488.89	889	5822.93	562	2110.55	1590	609.999	515	1855.61	1415	797.423	630	2747.33	1568	650.744	580	2436.51	1839	1182.75	881	3521.47	1700	549.464	514	501.65	407	2856.27	627	439.728	465	583.952	366	9249.96	611	1392.08	552	703.094	616	3770.21	683	3085.93	935
12	6	DSL	29	2874.22	2437	590.209	325	2363.17	926	5439.94	576	2126.85	1620	597.194	476	1813.7	1401	841.66	581	2644.88	1529	632.118	582	2436.51	1901	1165.29	789	3643.7	1691	532.22	523	451.485	375	2029.33	521	376.238	478	543.977	385	8807.88	610	1326.24	559	719.554	611	3998.31	714	3020.09	946
13	6	HPA	30	9302.97	2524	2125.49	317	6782.5	986	2934.8	537	4021.71	1695	1729.12	418	2345.08	1399	5676.25	543	2340.93	1427	4603.15	559	4206.78	2081	4150.15	770	5158.34	1670	1018.22	529	1660.1	375	2452.91	513	5417.79	505	1774.73	374	3793.98	641	2932.41	581	4388.1	656	3095.74	785	2773.85	1022
14	6	HPA	30	8287.88	2528	2238.73	312	6488.32	970	2733.16	489	4027.24	1717	1979.09	338	2223.54	1376	8702.2	527	2835.36	1362	6225.92	534	4134.96	2110	3647.44	709	4850.36	1646	1110.88	533	1537.84	356	2862.68	724	5276.42	509	2096.62	374	3963.05	648	3161.65	563	4433.95	684	3332.63	831	2276.2	1019
15	6	HPA	30	8057.23	2477	2292.6	278	6127.86	980	2695.87	470	3771.74	1718	3021.81	304	2057.81	1362	7724.39	512	2798.07	1338	5641.72	514	4683.25	2093	2795.31	683	4734.35	1635	1039.24	521	1641	349	2656.36	463	3581.93	514	1679.21	370	3561.87	653	2990.67	560	4340.34	638	3200.81	792	2061.28	1033
1	7	VVL	VVA	3185.2	2420	578.136	527	1619.87	908	1446.7	674	1756.22	1440	927.199	800	1562.6	1394	1952.57	1583	1708.5	1693	1292.63	1288	2247.1	2064	1767.13	1536	2260.73	1790	429.196	460	541.604	645	2793.49	939	419.906	490	607.563	621	606.634	605	695.817	709	508.16	641	981.018	896	799.864	969
2	7	VVL	VVA	2961.58	2244	587.681	530	1658.05	909	1456.25	665	1697.59	1419	1058.1	843	1591.24	1401	2061.66	1612	1698.96	1689	1373.07	1295	2154.38	2044	1749.41	1556	2221.19	1809	407.829	451	546.249	650	2558.45	913	413.403	471	554.61	587	548.107	598	686.527	649	539.746	656	947.575	865	827.734	959
3	7	VVL	VVA	2679.33	1996	587.681	517	1607.6	881	1397.62	661	1649.87	1360	868.568	744	1472.61	1344	1873.49	1539	1664.87	1634	1273.54	1266	2067.11	1944	1679.87	1499	2180.28	1731	401.326	439	547.178	631	2490.63	821	378.101	449	550.894	549	605.705	607	605.705	584	569.474	672	907.628	802	827.734	955
4	7	DBA	32	2350.83	1854	492.638	442	1624.84	790	1570.52	572	2095.25	1342	769.207	609	1389.02	1164	1679.17	1280	2023.64	1521	4431.27	1007	2596.54	1670	1591.5	1387	2089.08	1288	455.047	415	1582.06	584	1748.85	737	8228.45	437	677.751	489	740.416	571	717.278	528	590.019	636	997.827	685	1047.96	901
5	7	DBA	32	2457.02	1965	503.75	444	1666.82	775	1658.18	548	1919.93	1263	749.452	565	1474.21	1126	1519.89	1195	2002.65	1492	4176.93	888	2833.59	1653	1442.11	1249	2118.71	1205	454.083	400	1468.3	540	1668.83	683	7697.24	408	606.409	451	714.386	563	678.715	529	611.229	635	862.855	638	1076.88	937
6	7	DBA	32	2592.83	2084	506.22	444	1702.63	813	1675.46	534	1891.53	1286	709.942	544	1511.25	1155	1701.39	1115	2038.46	1518	4062.1	771	2723.71	1612	1390.25	1184	1927.34	1301	458.904	407	1460.59	520	1555.07	679	7967.19	413	604.48	431	706.673	567	689.32	525	580.378	634	882.137	618	1126.05	925
7	7	SBA	33	3078.53	2258	565.696	497	1409.12	893	2073.19	569	4954.96	1414	579.019	595	2221.79	1340	1436.79	1176	7043.53	1595	1053.51	701	3602.21	1778	2572.28	1142	4127.94	1680	984.661	453	1154.47	528	4130.19	695	1424.7	423	960.847	403	1586.23	597	1373.97	491	675.078	651	1156.54	641	2260.27	960
8	7	SBA	33	3063.16	2352	563.646	487	1474.7	900	2044.5	564	4817.64	1412	601.564	580	2396.01	1364	1387.6	1040	7476	1580	1037.11	659	3515.1	1765	2492.34	1080	4128.97	1694	939.104	448	1126.51	546	3952.11	682	1429.88	446	884.228	357	1741.54	604	1381.22	495	665.76	652	1179.32	652	2243.7	967
9	7	SBA	33	3191.26	2373	614.887	491	1408.09	889	1945.09	569	4965.21	1519	567.746	577	2349.89	1365	1219.53	868	6800.65	1558	959.224	644	3439.27	1782	2454.42	1054	4385.17	1712	986.732	454	1157.57	525	3909.65	669	1435.06	439	1029.18	337	1773.63	592	1314.95	498	645.052	632	1224.87	668	2128.77	1004
10	7	PTL I	WBA I	3317.82	2400	644.395	469	1341.88	978	1220.96	585	2192.71	1629	750.566	564	1772.46	1438	1097.09	738	1803.42	1622	887.702	616	2322.48	1882	1361.05	1017	2046.73	1722	325.348	488	353.846	479	1158.9	658	332.472	459	281.018	332	545.413	636	483.668	508	493.167	656	680.777	697	845.43	1064
11	7	PTL I	WBA I	3282.43	2401	550.022	429	1337.45	1014	1222.43	586	2217.78	1677	666.514	538	1782.78	1454	1005.67	659	1769.51	1595	780.057	570	2266.44	1979	1293.21	976	1975.95	1700	345.138	483	322.182	438	1143.07	601	326.14	469	316.64	336	571.536	655	510.583	527	492.376	657	731.439	751	865.22	1099
12	7	PTL I	WBA I	3423.99	2425	517.581	369	1405.28	1051	1215.06	578	2186.82	1694	650.294	477	1750.34	1425	942.262	610	1750.34	1564	827.244	569	2487.63	2025	1198.84	893	1953.83	1659	347.513	491	319.015	402	1076.58	502	327.723	475	330.098	370	566.786	643	519.29	542	501.875	650	750.438	794	845.43	1091
13	7	WFA	WFL	3694.81	2461	609.407	357	3548.73	971	1854.78	534	2958.5	1671	842.546	391	1664.43	1382	1240.95	568	1618.69	1452	3539.87	553	2958.5	1996	1261.61	723	1972.83	1617	405.275	462	596.359	386	1869.07	506	382.168	443	709.232	371	1542	613	2229.01	619	686.124	603	1085.18	841	1207.83	1019
14	7	WFA	WFL	3491.18	2478	576.945	337	3567.91	967	1711.65	496	2982.11	1697	832.217	328	1664.43	1345	1361.94	533	1599.51	1404	3575.29	527	2958.5	2033	1215.86	676	2087.92	1591	428.383	476	592.804	368	3659.92	590	524.369	444	622.133	374	3975.43	624	2205.02	597	1033.63	613	1053.18	841	1104.73	1005
15	7	WFA	WFL	3408.55	2454	543.007	287	3482.33	957	1786.91	470	2864.07	1693	793.852	296	1640.82	1324	1288.17	530	1570	1327	3669.72	507	2952.6	2012	1215.86	647	2018.57	1557	411.497	460	619.467	360	1686.87	446	452.38	436	569.696	368	2001.49	577	1925.06	582	697.678	582	982.082	844	1478.9	1006
1	8	CSA	36	4952.23	2573	1237.57	567	5468.7	943	2095.1	694	3810.16	1515	1455.85	781	2175.01	1450	2699.27	1687	3550.95	1773	2381.59	1341	3997.26	2183	3632.81	1625	3835.5	1827	557.616	468	600.267	678	5282.35	984	674.511	520	549.718	588	737.697	673	1885.31	795	548.139	724	964.376	797	2040.12	1044
2	8	CSA	36	4665.74	2397	1186.9	565	5486.24	929	2428.37	689	3858.88	1499	1666.34	819	2262.71	1461	2726.55	1692	3168.96	1773	2159.42	1348	3728.3	2198	3613.32	1592	3416.48	1860	450.99	475	615.274	674	5203.37	933	689.517	508	443.882	579	526.023	667	1845.03	722	534.712	737	906.719	792	2204.4	1075
3	8	CSA	36	4303.24	2207	1040.73	564	5854.59	916	2426.42	683	3724.41	1463	1391.54	753	2241.27	1457	2683.68	1620	3124.14	1738	2122.39	1274	3510.02	2034	3537.31	1532	3118.29	1826	456.519	489	589.999	659	5014.6	885	596.318	466	466.787	571	672.931	692	1564.64	638	679.25	753	889.343	795	2050.39	1084
4	8	Black bean crude	37	8843.88	2076	2391.63	530	14252.2	927	13275.1	656	18137.4	1506	12705.4	689	8863.39	1438	11322.8	1452	18377.5	1698	10572.4	1084	18791.2	2033	23022.2	1436	20198.5	1765	4345.98	510	7362.2	628	7397.24	788	16859.2	451	4814.99	554	4615.53	698	7417.91	590	8594.03	750	4307.35	756	11817.8	1108
5	8	Black bean crude	37	9202.11	2130	2313.62	519	14476	920	13710.3	639	18180.5	1441	11693.3	647	9204.17	1444	10642.2	1360	17947.5	1691	10524.2	927	19628.8	2005	21495.9	1351	20541.3	1622	4356.76	492	7777.3	608	7218.45	754	16954.5	455	4918.32	522	4549.94	690	7958.8	621	9054.95	755	4511.3	780	13115.2	1145
6	8	Black bean crude	37	9408.43	2223	2261.27	511	14146.5	922	13791.4	625	17869.4	1466	11626.6	618	8684.78	1396	10955.3	1279	18902.1	1641	10183.4	796	18980.1	1975	20819.5	1274	20250.8	1636	4029.71	486	7790.78	579	7107.93	723	17657.1	479	4835.66	477	5294.78	691	7853.68	587	9274.18	745	4409.77	792	13804.4	1125
7	8	GSL-IA4	38	3934.71	2250	924.214	523	5480.73	988	2499.12	601	3742.73	1531	2132.15	607	2427.76	1411	2466.84	1215	2945.93	1673	1411.81	722	2840.6	1965	2500.82	1254	2550.08	1776	501.421	515	472.331	575	2355.53	721	383.53	512	402.668	408	1645.12	701	1055.66	582	652.23	705	881.888	816	1544.07	1130
8	8	GSL-IA4	38	4055.33	2290	891.935	511	5852.79	1004	2393.78	581	3650.99	1563	1843.33	593	2400.58	1422	2081.18	1072	3000.3	1641	1369.33	678	3042.77	1942	2475.33	1184	2487.22	1748	584.864	525	464.676	569	2324.91	697	368.219	523	402.668	352	1668.85	702	1508.86	599	626.202	691	934.71	813	1476.7	1114
9	8	GSL-IA4	38	4121.59	2307	890.236	510	5789.93	987	2475.33	576	3547.35	1615	1685.33	566	2286.75	1418	1856.92	888	2786.23	1624	1196.04	644	2859.29	1914	2390.39	1124	2517.8	1754	533.573	529	483.814	565	2491.79	683	369.75	529	400.371	342	1367.23	690	1172.79	570	594.05	685	923.227	793	2692.36	1136
10	8	IRA	39	3844.39	2307	1238.59	507	3862.96	952	5437.05	572	3581.82	1609	1269.09	514	3600.39	1324	1572.77	749	2027.62	1469	3892.13	584	4183.88	1865	3311.3	1004	4384.12	1661	984.552	518	1785.7	544	4157.2	673	679.788	499	1605.94	352	3234.7	660	1539.33	565	1293.88	684	1445.35	802	1876.95	1111
11	8	IRA	39	4163.99	2330	1129.85	497	3759.52	963	5313.72	568	3500.93	1628	1051.61	497	3888.16	1333	2014.36	663	3641.5	1463	4053.92	529	2819.31	1911	3120.34	918	3815.22	1700	1016.49	519	1715.44	556	4579.67	622	739.099	491	1598.64	381	3188.16	682	1635.14	587	1242.78	680	1521.08	867	1947.21	1151
12	8	IRA	39	4072.49	2396	819.536	450	3695.87	979	5255.38	558	3508.89	1625	969.387	453	2205.32	1331	1421.59	617	1847.27	1417	3100.45	536	4649.34	1963	3051.38	834	3764.83	1596	1073.06	549	1813.07	508	4628.04	540	768.298	488	1778.4	423	3195.46	677	1667.08	629	1307.57	682	1542.07	933	2059.44	1138
13	8	IAA	40	3815.37	2503	856.642	369	2112.29	974	1726.03	542	2833.8	1720	2541.88	391	7754.4	1427	1933.82	578	7632.02	1517	1894.3	537	2557.18	2058	1866.26	816	6381.48	1692	781.592	555	889.989	458	7935.73	473	584.198	470	1224.3	419	1700.11	717	1833.6	634	1790.25	705	8203.87	945	2558.15	1179
14	8	IAA	40	3823.02	2588	808.201	367	2127.58	986	1659.74	504	2789.19	1737	2572.48	329	7815.59	1401	1924.9	564	7434.43	1459	1833.11	519	2617.09	2073	1833.11	737	6266.75	1693	876.296	561	916.232	421	7086.82	458	704.004	480	1272.23	412	1589.43	672	1725.21	642	1774.27	719	7956.27	956	2425.79	1158
15	8	IAA	40	3936.48	2548	837.521	304	2133.96	976	1645.72	483	2884.79	1726	2451.37	294	8034.85	1348	1850.96	547	7430.61	1387	1873.91	501	2561	2036	1887.93	689	6182.61	1642	955.026	571	936.77	408	7464.49	420	587.621	464	1153.56	390	1871.26	680	1743.46	640	1494.72	715	7949.42	930	2368.74	1194
1	9	HMA	41	2876.47	2704	660.506	603	1224.67	1012	1022.34	698	1705.33	1589	923.852	787	1684.99	1536	1513.7	1653	2009.35	1859	1319.94	1386	2326.22	2312	1630.39	1634	1968.67	1987	501.774	479	708.793	693	1784.3	958	529.377	520	673.304	652	843.848	734	807.373	825	839.905	797	1044.95	876	1080.44	1219
2	9	HMA	41	2679.49	2550	685.128	608	1074.79	999	1078.01	696	1612.19	1577	1044.82	824	1879.82	1527	1751.36	1759	1948.33	1847	1461.25	1406	2275.91	2383	1565.09	1646	1926.92	1965	627.957	520	752.168	706	1790.22	919	565.851	510	758.083	637	761.041	730	730.481	758	817.231	791	1023.26	889	1145.5	1225
3	9	HMA	41	2510.35	2390	688.339	601	1106.91	981	942.051	692	1579.01	1539	894.948	762	1607.91	1521	1527.62	1669	1963.32	1846	1272.84	1299	2069.3	2225	1538.33	1587	2126.04	1973	611.198	532	755.126	705	1718.26	903	617.113	505	706.821	626	934.542	753	718.651	681	1015.38	806	1102.13	893	1185.92	1214
4	9	GHA	42	4925.93	2131	1384.26	557	6814.68	938	4708.55	663	5141.26	1518	1901.06	679	3435.02	1433	3428.87	1466	3422.72	1731	3035.13	1096	4243.02	2129	3250.46	1474	6217.91	1930	981.787	526	778.859	687	6282.09	877	551.772	465	1823.46	611	2032.18	708	2124.95	697	1497.81	805	1762.58	907	3533.85	1221
5	9	GHA	42	4936.18	2114	1421.18	537	6919.27	930	5452.97	640	5485.79	1486	1812.87	634	3720.08	1409	3365.3	1338	4048.2	1689	2793.14	927	5040.77	2090	4185.6	1332	7257.64	1804	1187.61	531	787.556	672	6255.03	837	614.583	475	1842.78	582	2310.49	711	2145.24	693	1579.94	801	1686.24	923	3646.92	1233
6	9	GHA	42	5102.29	2132	1388.37	531	7286.35	927	5530.9	622	5612.93	1494	2013.85	594	3845.18	1388	3182.78	1279	4144.59	1674	2448.61	782	4909.52	2067	4134.33	1291	6511.17	1660	1367.35	546	776.926	638	5614.36	807	722.812	502	1733.59	533	6525.6	725	2176.17	660	1492.01	798	1681.41	915	3661.41	1238
7	9	MNA-G	43	4426.59	2168	882.105	520	3452.48	953	2113.25	580	3242.17	1503	1394.72	563	3446.63	1408	2500.27	1168	2262.22	1653	5270.72	697	2875.6	1917	2314.79	1260	3122.42	1654	930.609	549	909.067	626	3561.95	783	833.67	529	1067.4	454	2318.98	723	1551.01	657	2267.28	782	1418.53	911	2683.04	1141
8	9	MNA-G	43	4246.96	2179	813.464	513	3356.09	916	1929.24	569	3437.87	1545	1366.97	539	3259.7	1419	2425.79	1038	2288.51	1616	5387.56	656	2942.78	1883	2374.67	1206	3154.55	1739	963.999	554	921.992	629	3914.16	740	817.514	539	1065.25	407	2471.93	732	1547.78	656	2145.57	763	1496.08	901	2560.25	1132
9	9	MNA-G	43	4379.85	2162	785.716	511	3269.92	919	2089.89	554	3271.38	1573	1317.32	525	3294.75	1402	2333.78	854	2287.05	1587	5834.45	634	2811.34	1954	2278.28	1123	3369.23	1709	872.446	540	1009.24	617	3937.85	708	846.595	536	973.692	372	2259.74	716	1512.24	636	2155.26	741	1404.53	875	2580.72	1162
10	9	RCA I	RCA120	5043.39	2259	2011.96	540	3515.54	965	2951.87	583	4459.49	1624	2200.75	524	2806.23	1435	3288.99	761	3493.97	1603	2022.75	607	3719.17	2050	2800.84	994	4125.06	1828	756.985	589	1125.63	642	2530.11	730	890.894	562	1880.25	384	3446.21	753	2192.18	595	2307.98	764	1864.5	874	2617.54	1243
11	9	RCA I	RCA120	4576.81	2341	2121.19	522	3418.45	984	3574.88	571	4308.46	1647	2260.09	505	2705.09	1427	3089.42	681	3422.5	1586	1688.32	547	3697.59	2090	2374.71	909	3843.23	1770	719.962	603	1149.26	654	2859.37	659	797.945	562	2310.34	426	3376.1	765	2028.34	620	2409.59	752	1969.26	934	2794.78	1261
12	9	RCA I	RCA120	5083.85	2439	1944.54	517	3386.09	999	3326.75	577	3793.33	1668	2256.04	448	2682.17	1428	3026.04	640	3390.13	1576	2114.45	554	3831.09	2131	2392.24	842	3953.8	1767	753.046	616	1157.14	624	3160.27	574	926.341	565	1922.79	452	3606.9	780	2154.37	659	2452.13	764	1968.47	997	2406.44	1291
13	9	GSL I-B4	BSL I-B4	2882.5	2423	492.013	460	1584.13	907	1140.58	528	1753.11	1626	465.921	360	1396.52	1339	924.388	595	1392.79	1465	667.2	534	2186.72	2076	915.691	800	1548.1	1666	520.426	581	539.153	532	1519.88	487	440.588	507	527.325	430	885.118	686	759.94	649	589.422	699	1207.43	995	1155.19	1197
14	9	GSL I-B4	BSL I-B4	2819.14	2453	442.315	388	1739.44	946	1051.12	495	1807.78	1662	410.011	313	1344.34	1311	940.54	573	1308.31	1419	657.26	517	2154.42	2073	878.417	736	1514.56	1638	554.924	595	503.67	467	1655.9	461	483.957	495	543.096	441	788.524	664	790.495	686	609.135	702	1195.6	1025	1148.29	1178
15	9	GSL I-B4	BSL I-B4	2932.2	2378	412.496	328	1722.05	939	1016.33	468	1817.71	1633	378.949	289	1314.52	1262	908.236	552	1263.58	1355	632.411	495	2199.15	2042	797.658	679	1541.89	1570	572.666	581	504.655	442	2167.46	434	468.186	490	541.125	426	804.294	628	796.409	685	581.536	688	1223.2	968	1130.55	1143
1	10	EEL	46	3778.78	2662	857.67	558	2874.78	964	4006.43	677	2399.62	1475	1291.8	756	2321.53	1446	2218.29	1529	2255.35	1719	1729.9	1349	3222.88	2184	2906.55	1536	3600.09	1789	716.868	548	741.587	782	3244.92	991	520.062	500	990.685	639	2939.73	682	1364.33	836	826.204	792	1418.52	996	1863.48	1166
2	10	EEL	46	3555.09	2594	927.818	570	2943.61	940	4017.02	664	2240.79	1462	1310.33	796	2174.62	1379	2457.86	1636	2205.06	1689	1830.49	1371	3241.41	2225	2816.54	1537	3461.12	1746	638.906	559	697.853	787	2858.91	981	498.195	488	1034.42	633	2694.43	679	1365.28	784	1102.87	795	1412.82	1005	1865.38	1162
3	10	EEL	46	3388.32	2424	918.553	571	2768.9	917	4280.41	644	2258	1427	1289.15	730	2056.82	1349	2288.44	1554	2113.73	1697	1769.61	1298	3135.52	2083	2696.1	1478	3316.85	1760	647.463	552	711.163	783	2677.32	950	464.918	496	969.768	622	2779.05	704	1313.94	735	1056.29	800	1408.07	993	2008.94	1168
4	10	PNA	47	5468.92	2245	1281.48	531	10540.1	887	2651.09	624	4816.27	1439	2639.18	684	9525.36	1370	6862.35	1444	4842.47	1702	2158.03	1093	4316.07	2018	3182.27	1414	4308.92	1755	828.562	567	1577.75	721	8927.16	842	758.971	486	1092.79	615	1072.13	706	1403.77	721	1142.81	808	2394.35	980	2130.12	1158
5	10	PNA	47	5168.8	2018	1252.9	526	11021.2	912	2882.14	624	5078.29	1459	2808.3	631	10416.2	1368	6986.22	1328	5118.78	1690	1969.86	940	4306.54	1995	2810.68	1343	4408.96	1735	799.203	572	1562.52	708	7959.41	805	815.514	484	1041.68	581	1025.37	696	1254.8	725	1228.71	804	2725.99	1000	2246.47	1176
6	10	PNA	47	5275.99	2046	1245.75	522	11259.4	917	2708.26	591	5040.17	1474	2446.25	593	10392.4	1393	6497.92	1228	5073.52	1649	1731.67	786	4189.82	1965	2798.77	1275	4142.18	1640	860.095	574	1454.88	677	4638.64	747	822.038	515	1030.81	529	1626.68	681	1508.16	694	1226.53	774	2583.55	977	2187.75	1177
7	10	BPL	48	6010.34	2099	944.718	562	8105.65	1011	4735.21	577	4545.94	1473	2425.72	570	4218.86	1377	4074.41	1094	3078.22	1518	1803.1	697	3860.23	1972	5777.89	1232	3411.94	1560	1158.42	597	799.496	678	6788.06	811	535.832	530	1601.54	469	6109.34	731	2351.71	705	933.879	787	1570.07	987	3587.52	1164
8	10	BPL	48	5037.39	2083	2047.17	515	6860.42	899	5027.43	547	4149.12	1524	1520.85	563	3936.6	1353	3456.77	973	3139.65	1509	1764.91	663	4799.97	1954	5762.95	1180	3318.97	1591	1337.03	577	779.083	657	6881.62	780	552.843	515	1598.99	416	6205.45	732	2604.31	696	913.466	773	1538.6	984	3852.89	1155
9	10	BPL	48	5210.06	2214	1891.1	514	6752.5	912	4979.28	546	4217.2	1535	1140.64	542	2825.85	1328	3682.58	815	9782.57	1525	1519.19	634	3475.04	1957	5837.66	1085	3981.43	1696	899.858	578	734.005	663	6880.77	739	1052.95	520	1781	412	7099.35	720	2552.43	652	938.982	743	1636.41	923	3401.26	1232
10	10	ABA	49	4481.85	2272	1401.37	538	2521.1	939	1578.47	565	2200.76	1600	1086.83	543	2043.98	1395	2340.13	735	2646.92	1650	1153.61	620	3526.64	2061	2457.23	982	2732.08	1855	909.382	654	1084.16	687	2589.78	741	733.696	575	1339.95	400	1465.57	738	1396.39	624	1953.49	829	1507.44	917	1841.52	1267
11	10	ABA	49	4579.6	2273	1475.89	529	2478.52	978	1494.27	572	2126.24	1627	977.472	515	1875.58	1388	2320.77	654	2477.55	1610	1071.35	585	3201.46	2101	2230.77	902	2511.43	1813	928.498	661	1130.58	720	2221.11	655	744.619	583	1485.6	449	1500.16	755	1442.81	663	1899.78	816	1557.51	978	1793.28	1282
12	10	ABA	49	4466.37	2303	1310.39	506	2745.63	994	1483.63	568	2008.17	1651	982.311	452	1987.85	1389	2185.28	620	2572.4	1620	1075.22	557	3008.87	2142	2165.92	857	2293.67	1792	963.089	673	1111.47	709	2208.37	582	755.543	585	1502.89	471	1508.35	763	1608.49	703	1910.7	824	1709.53	1038	1868.83	1287
13	10	Jacalin，AIA	50	3439.73	2326	586.317	473	2820.43	941	1811.48	522	6764.63	1610	773.206	367	2887.61	1260	1474.34	583	1598.94	1490	14100.9	538	2210.9	2073	1633.14	789	2715.38	1655	940.479	637	815.33	603	2103.23	502	832.141	529	1060.96	453	4013.14	708	1409.32	716	3168.86	737	1641.87	1085	2584.21	1215
14	10	Jacalin，AIA	50	3593.63	2396	624.183	467	2875.4	946	1635.58	476	6720.66	1621	734.118	330	2919.37	1245	1519.54	566	1598.94	1473	14078.9	519	2265.87	2093	1448.69	745	3208.86	1606	967.563	646	765.832	562	3740.43	472	1118.86	538	1142.21	456	3944.03	697	1488.7	730	3209.95	725	1625.99	1104	2682.28	1221
15	10	Jacalin，AIA	50	3625.39	2308	493.483	372	2956.01	944	1701.54	460	6572.86	1599	695.03	305	2721.49	1235	1451.13	541	1559.85	1389	14225.5	500	2240.22	2046	1443.81	678	3062.28	1579	1105.79	631	725.672	488	4263.44	448	1223.46	523	1625.06	446	5412.19	654	1535.4	728	3169.8	712	1621.32	1059	2709.36	1172
1	11	ACL	ACA	3196.99	2824	1453.07	570	2130.56	998	2434.1	676	1799.31	1528	1046.81	786	1626.19	1468	2817.27	1596	1807.39	1769	2318.68	1350	2898.06	2126	3969.11	1571	2584.13	1887	786.117	618	961.115	824	3191.19	1131	647.768	551	865.828	737	2981.38	734	1508.1	974	1235.06	816	1494.36	1146	1770.14	1214
2	11	ACL	ACA	3141.59	2709	1505.01	571	2181.34	957	2533.35	664	1749.69	1509	1266.1	811	1547.71	1462	2748.02	1658	1773.92	1756	1990.9	1394	2858.82	2352	4115.69	1576	2502.19	1780	688.998	665	953.785	842	3223.26	1114	686.249	570	896.98	725	3112.4	766	1490.69	937	1203	851	1487.94	1188	1748.15	1230
3	11	ACL	ACA	2952.31	2552	1464.61	579	2116.71	914	2339.46	643	1749.69	1479	1097.59	762	1797.01	1459	2781.49	1587	1555.79	1743	2202.11	1307	2819.58	2232	3465.9	1510	2479.11	1760	914.388	644	970.277	832	3183.87	1109	668.841	566	930.88	724	2945.65	776	1454.96	907	1210.33	863	1474.2	1158	1760.98	1256
4	11	MPL	52	3115.76	2268	736.941	551	1425.88	841	1432.94	624	1807.06	1424	996.706	691	1982.12	1425	1725.18	1441	1911.53	1712	2277.18	1074	2367.53	2034	1812.71	1429	2192.47	1787	635.481	609	827.884	776	2513.34	906	531.033	506	778.409	633	1200.6	716	993.9	762	1089.55	820	1433.68	1043	1289.65	1180
5	11	MPL	52	2820.71	2036	686.118	540	1454.12	858	1351.06	612	1856.47	1435	965.647	654	1938.35	1388	1643.29	1333	1898.82	1690	2085.18	922	2328	2010	1711.06	1353	2233.41	1750	636.58	598	800.398	762	2562.81	868	515.641	502	763.016	598	1178.61	706	969.713	740	1126.93	817	1397.4	1028	1346.82	1186
6	11	MPL	52	2946.35	2047	674.823	540	1517.65	897	1359.53	593	1869.18	1452	955.765	611	1877.65	1371	1572.71	1227	1888.94	1652	1791.53	802	2391.53	1996	1637.65	1292	2069.65	1678	656.37	611	780.608	736	2504.54	830	532.132	520	704.746	540	1256.67	714	927.934	723	1043.38	806	1385.3	1019	1369.91	1212
7	11	PHA-L	53	5597.58	2145	917.49	531	14521.2	1013	14138.8	563	20254.7	1501	10602.9	609	5486.22	1412	6429.33	1154	20227.2	1709	4219.86	727	17416.5	2009	20475.5	1240	10651.2	1700	5044	661	8125.09	746	10958.3	868	19521	597	5468.42	489	3934	754	4376.77	816	6099.94	854	1835.39	1027	11226.6	1243
8	11	PHA-L	53	5809.46	2238	888.911	532	13182.9	944	13700.3	552	21208.7	1545	10630.5	590	5351.2	1395	6758.48	1001	19957.1	1674	4781.59	686	17303.2	2011	20269.5	1193	10715.2	1654	4671.62	649	8394.43	733	10779.7	835	19325.1	607	5409.24	493	3813.61	756	4171.71	802	5755.1	829	1814.98	1016	10935.8	1209
9	11	PHA-L	53	5716.82	2218	919.461	528	12613.3	927	13442.1	544	22397.2	1559	9458.72	575	5484.24	1394	6480.57	832	20655.8	1658	4360.79	644	16782.9	2023	20084.3	1045	11044.4	1711	4805.27	651	8505.63	717	10195.1	768	19185.4	600	5011.36	458	3810.55	723	4268.63	694	5599.01	813	1743.57	989	11755.1	1283
10	11	PHA-E	54	6670.93	2152	606.154	553	13437	894	9189.55	546	18912.9	1538	6892.43	535	6048.57	1361	5649.87	724	19129	1631	4844.91	633	11849.7	2010	13854	908	9158.22	1746	3182.41	653	5517.05	672	7607.26	679	14966.2	589	3946.87	410	3147.37	724	4667.74	652	4290.18	829	1662.04	1014	7248.38	1222
11	11	PHA-E	54	6348.95	2147	1205.82	518	13605.5	897	8915.11	545	19005.8	1574	6810.32	502	6077.75	1373	4944.31	660	19254.3	1611	5113.95	588	11254.4	2031	14359.7	849	8853.52	1730	3202.65	670	5306.86	734	6836.57	608	14052.3	583	3375.47	483	3619.13	714	4700.43	671	4354.01	822	1943.07	1054	6647.4	1236
12	11	PHA-E	54	6288.44	2174	1250.12	493	13654.1	916	8209.55	553	18463.4	1604	6944.3	439	6191.2	1340	5129.08	690	19213.2	1589	5282.51	560	11482.3	2092	14392.1	821	9008.03	1688	3254.03	682	5696.88	727	7413.42	555	16696	573	4802.41	476	4220.11	721	4266.04	712	4664.62	801	1987.45	1067	7146.4	1252
13	11	ECL	55	3249.43	2242	778.707	470	1653.02	889	1118.37	523	2246.8	1599	993.826	370	1743.6	1359	1103.27	587	1870.66	1536	883.121	559	2839.32	2109	1318.39	792	1920.98	1672	619.476	678	844.081	676	1093.14	513	744.458	548	727.25	476	1076.84	722	1038.8	736	1082.27	771	1317.75	1132	1320.46	1270
14	11	ECL	55	3368.94	2292	756.063	478	1689.5	903	1020.24	473	2212.84	1596	944.764	332	1817.82	1324	1164.92	574	1844.24	1494	813.931	528	2797.81	2146	1269.33	733	1848.01	1640	631.25	685	783.402	618	1176.46	512	781.59	554	723.628	478	1057.82	712	1016.16	751	1085.89	773	1301.44	1111	1338.58	1274
15	11	ECL	55	3368.94	2266	718.322	422	1660.57	887	1050.44	454	2212.84	1596	910.798	315	1689.5	1274	1234.11	549	1773.79	1443	763.611	508	2698.43	2099	1174.98	694	1783.85	1592	604.08	660	724.533	548	1553.22	470	755.326	527	732.684	466	1055.1	671	1081.37	758	1006.2	744	1380.24	1186	1276.08	1205
1	12	MAL I	56	3218.2	2946	562.188	581	1136.11	953	1131.42	720	1414.27	1516	787.532	796	1326.25	1488	1538.68	1598	1573.89	1783	1217.1	1387	2116.13	2177	1360.28	1565	1660.74	1957	448.479	618	634.541	812	1702.64	1002	390.554	558	572.228	702	770.577	718	745.125	889	629.275	826	1050.55	1142	1018.95	1244
2	12	MAL I	56	3073.84	2789	564.535	589	1105.6	918	1085.64	673	1410.75	1525	906.073	849	1285.17	1500	1624.36	1648	1536.33	1768	1226.49	1420	2212.37	2357	1316.86	1538	1627.88	1884	487.973	612	624.009	814	1635.94	1013	380.9	538	581.882	680	773.21	709	730.205	820	645.95	833	1028.61	1151	989.989	1218
3	12	MAL I	56	2843.8	2598	584.488	600	1157.24	906	913.115	637	1381.41	1503	805.138	804	1400.19	1529	1514.03	1552	1545.72	1768	1154.89	1337	2120.82	2221	1309.82	1491	1560.98	1843	480.952	608	616.988	806	1523.6	963	381.778	520	548.531	670	739.859	714	750.391	816	647.706	841	994.378	1142	965.415	1231
4	12	CY3	68	2592.03	2410	682.989	638	1323.9	984	1681.05	660	1744.66	1600	952.075	772	1663.44	1614	1772.05	1512	1802.39	1913	1232.9	1175	2090.06	2208	1471.66	1496	2175.19	1970	799.319	698	1088.62	882	1777.14	1121	765.025	574	884.615	710	1207.33	803	1006.84	827	1122.92	922	1515.1	1163	1647	1313
5	12	CY3	68	2245.64	2157	631.129	602	1262.26	978	1594.95	652	1745.63	1594	927.612	704	1671.27	1598	1660.5	1413	1842.5	1902	1100.81	996	2050.92	2173	1443.28	1448	2175.19	1945	823.941	711	1084.23	864	1862.44	1040	749.197	580	896.047	665	1300.54	787	966.394	798	1100.05	927	1529.17	1143	1592.48	1311
6	12	CY3	68	2283.81	2214	676.139	592	1286.72	985	1646.81	637	1742.7	1616	877.709	667	1612.56	1561	1553.85	1304	1797.49	1866	954.032	844	2088.11	2176	1400.23	1374	2052.88	1925	803.716	701	1068.4	847	1813.2	987	743.921	595	834.493	573	1300.54	781	935.617	774	1091.26	913	1540.6	1103	1683.06	1350
7	12	CY5	69	3605.83	2314	1949.86	560	3013.81	957	2801.87	608	4310.89	1602	2811.76	656	4476.21	1576	4004.28	1263	5651.78	1945	3569.8	800	6256.52	2358	4835.09	1378	9264.67	2234	820.267	701	5512.62	960	8679.07	1630	10184.7	882	9085.02	1394	14766	966	9957.82	1684	16227.4	1089	13305.8	2006	15636.4	1630
8	12	CY5	69	3526.71	2316	2121.54	532	3000.39	960	2857.68	580	4209.16	1585	2904.31	634	4424.63	1543	4036.78	1083	5272.4	1886	3499.16	750	5814.27	2304	4705.81	1232	8111.71	2146	4885.78	762	5901.86	976	8799.66	1085	9687.98	772	8362.66	1312	13546.9	927	11778.6	1426	17611.3	1004	13912.3	1869	19978.9	1465
9	12	CY5	69	3545.78	2225	2091.86	537	3051.25	969	2997.56	580	4183.73	1647	2702.26	606	4387.9	1576	4086.23	896	5292.18	1920	3653.87	707	6298.91	2361	3948.47	1040	9041.43	2087	5088.76	842	5961.56	1056	8419.97	1557	7936.41	773	8455.79	692	11132.7	948	9506.5	1309	13556.5	1012	12443.7	1797	14260.9	1541
10	12	printing buffer`1	70	2065.2	2086	399.819	496	696.218	837	430.738	500	1163.21	1425	475.518	526	1017.14	1289	651.438	696	1234.64	1517	606.658	625	1602.47	1917	799.637	850	1156.81	1473	415.785	600	473.581	666	448.565	632	503.773	664	396.807	496	662.496	945	610.738	754	850.548	1040	1165.41	1366	1137.8	1453
11	12	printing buffer`1	70	2069.46	2081	397.686	497	687.688	841	404.083	487	1230.38	1498	442.466	480	1060.85	1275	620.519	642	1232.51	1500	568.276	575	1667.51	1903	794.306	806	1279.42	1515	430.45	613	512.399	696	460.642	580	364.028	524	441.664	503	496.009	680	606.425	692	663.358	826	1005.82	1165	936.811	1201
12	12	printing buffer`1	70	2035.34	2086	396.62	478	712.21	831	421.142	512	1179.2	1486	414.745	421	1046.99	1275	598.129	608	1201.59	1477	554.415	555	1695.23	1942	804.968	785	1282.62	1548	445.977	634	523.613	706	433.038	538	362.302	517	411.472	476	477.894	648	649.556	723	548.629	730	880.74	1083	898.855	1188
13	12	printing buffer`8	71	2118.39	2161	421.78	492	699.1	875	413.344	509	1287.48	1530	382.765	377	1098.74	1324	560.967	580	1232.65	1545	562.021	563	1750.39	2074	787.674	790	1274.83	1666	464.02	662	518.948	696	395.155	507	372.2	534	389.416	477	495.173	684	660.778	761	562.399	741	913.283	1137	881.31	1238
14	12	printing buffer`8	71	2114.17	2216	443.923	483	733.897	855	372.221	469	1253.74	1536	357.458	349	1040.74	1300	550.423	576	1183.09	1517	530.388	541	1806.27	2109	752.877	752	1284.32	1630	477.137	675	505.831	650	406.632	501	361.542	522	414.011	481	477.137	673	641.102	761	553.381	744	869.833	1105	913.283	1235
15	12	printing buffer`8	71	2224.89	2197	381.711	451	721.243	856	352.186	448	1288.54	1560	319.498	319	986.965	1233	547.259	561	1137.75	1448	507.19	520	1736.68	2071	692.773	708	1231.6	1604	436.966	651	438.606	565	363.182	471	356.623	508	391.876	465	452.543	642	624.706	767	549.282	720	978.869	1252	859.995	1193
[truncated: 42 more columns]

## Sheet: NC
				orin1		orin2		orin3		orin4		orin5		orin6		orin7		orin8		orin9		orin10		orin11		orin12		orin13		orin14		orin15		orin16		orin18		orin19		orin20		orin21		orin22		orin23		orin25
				1		2		3		4		5		6		7		8		9		10		11		12		13		14		15		16		17		18		19		20		21		22		23
Column	Row	Name	ID	NC221F635 Median	NC221B635 Median	NC222F635 Median	NC222B635 Median	NC223F635 Median	NC223B635 Median	NC224F635 Median	NC224B635 Median	NC225F635 Median	NC225B635 Median	NC226F635 Median	NC226B635 Median	NC227F635 Median	NC227B635 Median	NC228F635 Median	NC228B635 Median	NC229F635 Median	NC229B635 Median	NC230F635 Median	NC230B635 Median	NC231F635 Median	NC231B635 Median	NC232F635 Median	NC232B635 Median	NC233F635 Median	NC233B635 Median	NC234F635 Median	NC234B635 Median	NC235F635 Median	NC235B635 Median	NC236F635 Median	NC236B635 Median	NC238F635 Median	NC238B635 Median	NC239F635 Median	NC239B635 Median	NC240F635 Median	NC240B635 Median	NC241F635 Median	NC241B635 Median	NC242F635 Median	NC242B635 Median	NC243F635 Median	NC243B635 Median	NC245F635 Median	NC245B635 Median
13	2	SSA	10	9003.87	2047	7635.64	2531	7811.31	2427	5808.69	2383	6813.04	2130	5674.98	3078	5872.51	1376	6167.92	2937	5494.87	1616	5477.04	2697	3514.22	2183	5643.77	2038	5402.16	2033	3693.28	2511	2487.45	1210	1631.76	827	5591.14	858	9608.71	2370	3840.39	1249	4859.56	3105	3506.68	2544	6073.8	2145	6265.67	4766
14	2	SSA	10	9036.9	1789	7600.73	2531	7679.09	2459	6185.28	2311	6006.03	2072	5636.1	3086	6169	1392	6307.51	2972	6014.06	1626	5851.29	2813	3457.88	2239	5822.34	2049	5888.23	2064	3886.1	2625	2544.05	1328	1527.19	826	5517.19	1003	8817.08	2382	4384.94	1259	4737.72	3209	3597.79	2627	6096.71	2171	6425.1	4715
15	2	SSA	10	9042.56	1589	7738.5	2547	8386.24	2564	5881.5	2279	6033.13	2046	5281.49	3008	7005.45	1408	5528.4	2831	5908.32	1551	6116.23	2818	3391.03	2249	5305.71	2016	5603.66	2044	3906.24	2640	2520.06	1303	1573.24	813	6015.45	1092	9802.68	2336	3819.21	1302	4952.79	3245	3730.22	2620	6101.92	2179	6548.59	4777
1	1	LTL	1	4361.97	2367	2734.8	2205	20606.5	2931	3052.1	2146	3620.18	2383	2669.79	2675	2873.35	1263	3303.88	2248	3154.24	1815	2677.42	2530	2918.8	2072	3630.43	2078	5288.63	1888	3868.05	2628	2637.98	1773	1508.66	868	5043.19	1579	5965.18	2725	935.53	1016	3337.3	3379	2603.21	2491	2831.42	2109	11060.8	6494
2	1	LTL	1	2402.63	2388	2883.16	2299	29357.2	3006	3251.65	2282	4319.64	2168	1562.09	2793	954.662	1214	3762.49	2202	3554.41	1769	3086.43	2259	2771.96	2039	3987.37	2184	4994.19	2023	3836.95	2542	2652.91	1734	1583.29	855	4782.88	1450	6612.3	2611	1278.36	1046	3412.84	3370	2756.23	2484	2708.09	2026	10755.5	7026
3	1	LTL	1	2894.39	2564	2804.55	2282	21865.4	3067	2973.76	2308	3872.4	2082	2570.33	2456	2314.33	1105	3246.87	2145	3491.77	1720	2660.47	2408	2799.07	2017	3831.49	2089	4717.07	2050	3782.23	2469	2574.55	1662	1547.22	852	4627.25	1385	6123.55	2564	1258.99	1062	3318.9	3391	2728.14	2453	2346.85	2008	9890.26	6664
4	1	PSA	2	10448	2608	10612.2	2350	14341.6	2996	8168.56	2323	7383.52	2116	6001.72	2954	3513.22	1178	6676.76	2156	9641.39	1809	9737.4	2510	6585.34	2054	8023	2091	10489.3	2127	5754.57	2426	9458.2	1635	4262.88	857	7147.9	1331	6924.27	2588	4632.74	1112	7324.74	3399	6946.75	2517	3665.96	1940	17025.7	6515
5	1	PSA	2	10422.7	2582	10000	2413	13219.1	2703	7351.58	2137	6942.62	2099	6790.73	2782	5313.76	1180	6457.07	2108	9670.19	1695	8782.09	2476	6530.17	2013	7277.37	1998	10601.2	2074	5878.97	2333	9155.05	1542	3925.23	837	6673.03	1296	6444.06	2529	4863.1	1108	7369.88	3164	6848.02	2485	3492.39	1906	16548.6	6083
6	1	PSA	2	9979.37	2478	9920.8	2270	12819.5	2588	7174.39	2049	6420.45	2007	7163.48	2629	4420.35	1126	5731.17	2107	8685.12	1618	10701.3	2466	6128.98	1839	7596.59	1866	10576.7	2014	5323.89	2217	9288.85	1484	4166.71	850	6309.53	1244	7770.65	2480	4823.61	1091	7143.27	2991	5848.51	2494	3615.99	1876	13483.9	5920
7	1	LCA	3	7042.37	2402	6720.34	2092	9256.75	2339	6813.13	1911	5771.78	1862	5274.04	2638	4872.55	1077	5755.64	1981	6906	1425	7106.44	2258	5860.15	1820	6852.74	1639	9861.56	1856	8091.13	2178	9224	1387	5015.99	829	3730.62	1174	5242.88	2416	3706.52	1081	9051.41	2811	7297.88	2428	4887.71	1794	10954.1	5538
8	1	LCA	3	7052.36	2360	7020.16	2160	8188.43	2195	6664.52	1860	4991.39	1701	5153.68	2591	5062.57	1025	6045.71	2106	6778.87	1380	7714.27	2271	5668.6	1784	6841.38	1543	9889.57	1745	8086.89	2258	8521.96	1341	5014.58	806	3664.96	1094	5243.89	2359	3695.83	1074	8507.66	2698	7365.55	2377	4885.81	1806	10260.4	5208
9	1	LCA	3	6888.02	2421	7237.81	2257	7779.13	2248	6769.28	1863	4921.51	1706	5673.94	2827	4769.74	1098	6111.81	2382	6852.18	1403	7537.95	2304	5978.26	1810	6618.03	1631	9413.34	1695	8122.2	2528	8784.69	1318	4979.26	827	3494.24	1016	4903.45	2388	3788.44	1060	8101.63	2581	6875.23	2343	4869.68	1803	9949.69	4942
10	4	MNA-M	19	5969.32	2395	8976.4	2385	9339.29	2292	6043.97	2091	7279.01	1870	13546.3	2935	8038.21	1234	12026.1	2656	6165.66	1509	14744.2	2617	9324.01	1890	6403.17	1838	7333.71	1891	4189.11	1868	2662.16	1157	3248.13	768	5586.59	982	5551.1	2421	3385.33	1019	5680.83	2424	5893.44	2173	4379.93	1702	10152	4609
11	4	MNA-M	19	7033.81	2152	9386.05	2458	10626.6	2351	6436.46	2144	6950.6	1949	12655.9	2988	6841.36	1323	11433.3	2906	6428.41	1548	14675.1	2701	8550.57	2030	6703.43	1885	7585.64	1883	4329.48	1910	2576.47	1133	3250.58	742	5270.6	895	6309.48	2369	3578.07	1047	5368.83	2423	5690.34	2292	4411.15	1806	10559.4	4399
12	4	MNA-M	19	7391.63	2078	9178.74	2547	9973.59	2442	7550.87	2192	7075.03	2031	12110.3	2999	8372.32	1350	11583.1	2962	6039	1549	15183.9	2758	9878.06	2140	5505.16	1993	5835.18	1999	4036.5	1949	2507.1	1078	3372.18	753	5110.44	813	6069.68	2322	4024.03	1078	5430.19	2583	5332.53	2373	4473.59	1871	11034	4124
10	1	UEA I	4	3331.01	2165	2972.38	2094	6256.25	2283	1789.42	1957	2065.62	1683	3643.24	2616	2098.54	1197	3443.57	2653	2605.9	1471	2182.22	2412	1572.7	1897	1753.81	1762	10433.6	1730	2934.82	2544	1331.12	1286	1093.38	820	3677.58	961	5039.12	2395	1686.33	1058	2919.5	2571	5535.49	2370	2683.28	1994	5590.14	4749
11	1	UEA I	4	3081.96	2132	2908.87	2341	6865.83	2391	1908.44	2036	2285.27	1873	3894.27	2756	3021.2	1277	3527.64	2697	2721.44	1507	2747.8	2192	1634.2	1943	1891.96	1856	10513.6	1826	2913.3	2504	1358.79	1256	995.01	819	3548.29	893	5108.81	2374	1666.16	1118	2877.05	2322	5337.03	2460	2754.48	2111	5408.05	4580
12	1	UEA I	4	3194.03	1843	2860.31	2377	6209.68	2389	1972.61	2081	2693.2	1845	3711.41	2635	3303.13	1340	3994.1	2698	3302.22	1403	2331.22	2617	1609.77	2105	1970.3	1939	10407.5	1959	3115.17	2511	1384.41	1145	1018.58	762	3809.89	860	5449.2	2308	1624.78	1198	2828.23	2733	5439.97	2550	2774.06	2158	5787.21	4273
13	1	AAL	5	8128.29	1991	14088.9	2520	8403.31	2362	3638.99	2191	14760.5	2012	4930.35	3077	5407.34	1388	5524.24	2840	10499.4	1563	16457.2	2551	7635.23	2156	6076.58	1996	5002.82	2067	6980.04	2662	2718.17	1244	4685.19	868	2998.81	863	6911.51	2333	4278.83	1287	5043.91	3058	6839.6	2677	5031.13	2223	9674.03	4807
14	1	AAL	5	6384.95	1720	20462.4	2562	5802	2446	4820.21	2167	14853.5	2037	5031.6	3058	3671.83	1350	8126.99	2887	13678.3	1499	11887.5	2742	8498.46	2206	7438.6	1998	4981.2	2090	7367.69	2775	2779.13	1341	4832.42	859	3086.66	1025	8071.82	2306	4396.97	1316	4876.27	3206	6722.59	2731	5161.48	2258	9879.39	4894
15	1	AAL	5	4098.11	1528	22204.7	2513	26690.3	2543	4968.13	2136	14044.7	2031	29257.2	2827	10927.6	1354	8222.91	2654	13169.8	1501	15460.9	2643	10350.5	2217	11426.8	1865	7790.17	2029	6249.6	2782	2720.47	1352	5206.27	834	3298.8	1113	7150.43	2336	4324.96	1314	5504.09	3281	5540.09	2731	5013.19	2271	11352.6	4928
1	2	LAL	6	5618.85	2641	3538.24	2259	8232.46	3031	3901.18	2176	3385.04	2310	3907.5	2811	2403.35	1276	3905.7	2167	3243.48	1839	5610.86	2546	2456.38	2059	3326.62	2250	7558.8	2019	3136.32	2545	2105	1628	1529.75	836	5270.21	1544	7449.51	2724	2473.9	1060	2924.66	3245	3355.16	2566	4268.83	2170	7183.94	6299
2	2	LAL	6	6201.5	2655	3611.83	2338	8868.32	3052	3887.23	2346	3239.46	2256	3756.94	2899	2227.55	1236	3919.68	2169	3345.82	1895	5602.99	2524	2465.68	2034	3351.72	2211	7693.61	2067	3260.44	2477	2024.23	1618	1534.67	841	5010.67	1436	7439.86	2629	2567.53	1072	3011.54	3228	3382.19	2539	4291.81	2061	7638.77	6247
3	2	LAL	6	6164.2	2655	3506.99	2356	8812.52	3084	4130.18	2331	3394.01	2183	3915.47	3032	2045.75	1225	3668.96	2080	3373.94	1828	5442.17	2486	2434.06	1967	3396.35	2131	7511.38	2137	3231.87	2440	2036.05	1616	1543.54	830	4884.12	1378	7373.37	2608	2516.37	1079	3007.67	3259	3294.35	2545	4214.92	1977	7196.66	6485
4	2	TL	7	2460.32	2808	1989.17	2335	15843.9	2739	2023.37	2362	1814.04	2272	2196.34	3154	1297.76	1284	2239.63	2186	1838.39	1760	2195.6	2360	1995.57	2212	2038.08	2115	1875.15	2269	2332.54	2526	1578.19	1647	871.89	882	1911.83	1384	2582.68	2902	1071.02	1021	2317.57	3391	1692.6	2597	1521.73	2038	5003.93	6775
5	2	TL	7	2465.6	2769	1982.83	2359	3502.23	2726	1814.28	2163	1665.89	2187	2126.57	2885	1189.69	1242	1948.03	2218	1569.98	1789	2138.37	2497	1830.63	2115	1888.31	2037	1730.44	2184	2226.23	2439	1508.69	1572	984.326	810	1764.76	1330	2484.97	2851	924.313	1068	2238.7	3210	1697.68	2576	1452.79	1986	4854.9	6374
6	2	TL	7	2292.35	2676	2030.37	2296	3585	2615	1768.54	2081	1573.18	2095	2106.5	2842	1071.37	1196	2025.36	2230	1495.97	1681	2046.6	2512	1818.48	2038	1797.23	1912	1621.15	2141	2120.95	2366	1411.58	1487	795.229	888	1680.15	1274	2317.76	2778	911.593	1107	2101.33	3091	1663.76	2515	1420	1960	4528.24	6099
7	2	MAA	8	2135.37	2390	1888.8	2148	6120.58	2456	1559.99	1947	1584.73	1931	2325.93	2854	1771.28	1140	2492.76	2194	1512.06	1406	2004.48	2294	1863.71	1665	1882.39	1756	1774.26	1939	2263.27	2093	1415.61	1358	762.251	828	3304.93	1190	3841.35	2517	1185.77	1077	2069.38	2784	2443.1	2162	1391.89	1793	5223.08	5678
8	2	MAA	8	2146.53	2382	1946.49	2168	5486.83	2242	1514.23	1926	1548.97	1742	2319.97	2712	1925.73	1107	2957.18	2189	1654.41	1243	1970.74	2267	1693.66	1551	1855.85	1628	1602.24	1839	2387.11	2020	1377.18	1320	807.089	800	3279.02	1126	4208.89	2457	1222.54	1073	1990.85	2657	2612.06	2364	1441.53	1779	5354.32	4714
9	2	MAA	8	2180.03	2388	2385.65	2319	5789.28	2327	1489.35	1957	1560.89	1695	3306.58	2468	1754	1155	2880.5	2401	1467.77	1433	2103.59	2377	1915.81	1611	1982.65	1726	1805.72	1723	3000.96	2406	1361.16	1206	1160.46	801	3313.56	1055	4930.52	2450	1531.66	1073	2032.6	2617	3316.77	2322	1562.1	1642	5605.15	4484
10	2	SNA	EBL	5938.89	2278	9851.81	2261	10804.7	2255	4021.59	2060	4698.98	1882	9827.21	3060	8670.04	1224	7719.89	2634	5910.75	1487	9046.56	2446	5287.63	1890	5871.29	1819	4813.46	1741	4676.32	2441	2143.72	1240	2910.2	785	7666.37	972	10048.7	2395	4645.83	1027	5291.13	2547	4964.07	2232	3040.17	1906	9276.46	4753
11	2	SNA	EBL	5651.29	2032	10008.4	2381	11557.2	2299	4278.36	2238	10042.5	1954	8769.47	3056	7763.65	1267	7303.65	2815	6296.25	1516	8841.92	2611	5033.97	2000	6050.94	1825	4611.45	1841	4766.69	2377	2246.18	1211	2911	779	7357.29	899	9793.91	2319	4719.88	1059	5157.13	2437	4970.24	2291	3146.97	1969	7717.2	4610
12	2	SNA	EBL	5632.12	1973	10147.4	2424	12056.4	2385	4236.76	2365	9795.12	2042	11762.2	2916	10444.9	1328	7441.75	2863	6361.63	1525	9036.37	2628	5056.33	2098	5909.84	1943	4358.56	1976	4625.49	2347	2171.96	1146	2756.9	774	7204.29	850	9796.21	2308	4501.25	1152	5192.4	2693	4466.87	2431	3183.4	2046	11178	4398
13	2	SSA	10	9003.87	2047	7635.64	2531	7811.31	2427	5808.69	2383	6813.04	2130	5674.98	3078	5872.51	1376	6167.92	2937	5494.87	1616	5477.04	2697	3514.22	2183	5643.77	2038	5402.16	2033	3693.28	2511	2487.45	1210	1631.76	827	5591.14	858	9608.71	2370	3840.39	1249	4859.56	3105	3506.68	2544	6073.8	2145	6265.67	4766
14	2	SSA	10	9036.9	1789	7600.73	2531	7679.09	2459	6185.28	2311	6006.03	2072	5636.1	3086	6169	1392	6307.51	2972	6014.06	1626	5851.29	2813	3457.88	2239	5822.34	2049	5888.23	2064	3886.1	2625	2544.05	1328	1527.19	826	5517.19	1003	8817.08	2382	4384.94	1259	4737.72	3209	3597.79	2627	6096.71	2171	6425.1	4715
15	2	SSA	10	9042.56	1589	7738.5	2547	8386.24	2564	5881.5	2279	6033.13	2046	5281.49	3008	7005.45	1408	5528.4	2831	5908.32	1551	6116.23	2818	3391.03	2249	5305.71	2016	5603.66	2044	3906.24	2640	2520.06	1303	1573.24	813	6015.45	1092	9802.68	2336	3819.21	1302	4952.79	3245	3730.22	2620	6101.92	2179	6548.59	4777
1	3	MAL II	11	2200.47	2526	1999.94	2264	3740.42	2996	1968.53	2214	1823.37	2310	2172.84	2753	1153.87	1260	1963.56	2267	1461.57	1809	2149.94	2472	1664.35	2076	1638.58	2232	1547.38	2176	1988.27	2496	1346.5	1592	631.617	802	1705.48	1546	2289.67	2764	950.34	1029	2077	2912	2269.26	2204	1520.27	2034	5603.85	6751
2	3	MAL II	11	2222.04	2522	2103.44	2284	3616.57	2987	2070.65	2361	1806.48	2284	2244.64	2924	1112.02	1232	1874.64	2166	1462.65	1872	2177.86	2548	1922.09	1735	1572.17	2180	1531.52	2134	1931.41	2379	1324.16	1562	624.508	792	1712.21	1473	2250.28	2317	945.359	1043	2039.15	2909	2140.76	2460	1453.97	1919	5681.34	6714
3	3	MAL II	11	2187.53	2535	2108.83	2309	3565.51	3098	2130.4	2362	1809.65	2247	2261.53	3032	1069.13	1234	1884.06	2134	1425.06	1841	2054.36	2442	1669.31	2047	1583.07	2116	1520.62	2180	1938.51	2307	1303.85	1503	612.323	768	1619.97	1413	2164.76	2680	974.248	1042	2058.07	2935	2099.91	2420	1435.97	1850	5931.77	6751
4	3	SNA-I	12	9773.74	2703	10853.9	2468	18811.1	2950	5959	2593	9354.26	2177	7072.59	3131	18590.3	1254	14767.5	2702	7286.02	1712	6534.27	2374	7357.68	2161	8394.9	2223	8644.86	2329	6458.91	2243	5577.38	1451	4045.99	777	10815.6	1361	11564.4	2749	6352.36	1073	6306.79	2962	5506.15	2502	4401.49	1823	14311.7	6476
5	3	SNA-I	12	11262.1	2663	12001.7	2476	46478.4	2736	6481.41	2226	7929.26	2127	6721.1	3080	18986.8	1225	13809.6	2563	8750.3	1775	6700.69	2313	7414.98	2095	8087.63	2082	8619.11	2244	6288.05	2190	5571.09	1391	3745.16	771	10702.7	1293	11166.9	2710	7032.37	1078	6422.06	2902	5686.65	2467	4893.02	1846	20589.5	6231
6	3	SNA-I	12	8197.86	2550	10863.2	2370	34476.5	2670	6303.55	2154	8303.38	1964	14729	3056	13758	1151	15362.9	3798	6993.35	1594	6640.43	2296	7406.67	1980	8428.11	1974	8672.26	2159	6168.56	2095	5374.04	1334	2723.18	776	10354.1	1224	12683	2726	7360.3	1099	6497.12	2874	6234.41	2384	4525.87	1818	13089.2	5992
7	3	NPL	NPA	2592.41	2197	2178.17	1935	1793	2299	2506.38	1864	2376.72	1659	2498.09	2691	1283.27	985	2151.64	1997	1465.32	1232	2402.16	1849	2588.95	1737	3276.97	1561	1703.21	1651	2202.5	1827	1349.36	1187	874.424	687	1542.88	1143	2773.97	2453	1140.94	982	2412.63	2248	2292.23	2035	1952.79	1654	4984.33	5413
8	3	NPL	NPA	2667.63	2179	2463.16	1996	2076.79	1886	2515.92	1883	2254.39	1496	2262.99	2538	1070.61	1019	2211.06	2100	1503.96	1187	2198.5	1761	2396.55	1570	3069.5	1508	1704.98	1661	2134.79	1879	1297.13	1155	835.732	716	1490.75	1066	2640.63	2384	1141.88	950	2258.37	2198	2195.35	2139	1930.57	1665	4653.71	5025
9	3	NPL	NPA	2629.49	2169	2540.5	2040	2055.09	1889	2620.07	1934	2169.34	1570	2528.67	2489	1249.91	995	2476.89	2313	1549.92	1214	2399.03	1927	2558.8	1642	3202.49	1532	1581.74	1419	2070.95	1868	1240.06	1131	837.667	734	1397.51	1010	2572.46	2332	1154.11	1001	2343.96	2203	2182.18	1982	1892.6	1553	4525.85	4775
10	3	ConA	14	15343	2241	29365	2384	16584.3	2216	10735.6	2080	17521.7	1788	12849.6	2911	16205.2	1232	20231.2	2646	20101.9	1498	27093.9	2512	11938.6	1963	9682.61	1827	11761.4	1836	8054.57	2170	3144.19	1183	6996.44	730	7325.64	953	13564.6	2319	8977.73	1004	8111.87	2444	14530.3	2116	5586.5	1743	20221.7	4635
11	3	ConA	14	15635.2	1970	28810.3	2408	18990.8	2324	10785.4	2194	10777.7	1803	11759.3	2945	11288.1	1304	19454.9	2838	15814.3	1531	26332.5	2654	11076.7	2063	10986.6	1898	10035.4	1898	7690.21	2237	3111.88	1129	7098.12	725	8291.09	896	14073.2	2251	9537.77	1048	7720.51	2408	14506	2192	5607.34	1875	18423.9	4508
12	3	ConA	14	15645	1950	25743	2490	17337.6	2319	12409	2272	11416	1944	12888.5	2967	13291.5	1361	19836.2	2948	18353.6	1539	23268.4	2711	11247.9	2145	11371.4	1964	9620.09	1965	8036.03	2217	3493.19	1090	7242.7	721	11075.5	847	13741.4	2228	9327.83	1079	7695.02	2510	14228.1	2281	5795.67	1881	20936.8	4241
13	3	GNL	15	2646.29	1896	3461.6	2394	2761.36	2301	3690.74	2213	3787.84	1982	3397.23	2731	1488.55	1329	3318.15	2905	1975.9	1497	3132.06	2611	5273.74	2087	5026.22	1863	2410.06	1860	2938.83	2225	1257.61	1058	1429.29	725	1826.4	814	2972.68	2179	1646.37	1119	2511.42	2712	2798.91	2357	2449.75	1936	4175	3770
14	3	GNL	15	2574.89	1751	3731.24	2422	2814.89	2319	3701.81	2216	4027.38	2012	3671.55	2862	1554.17	1310	3459.76	2936	2141.38	1522	3129.87	2651	5284.58	2063	5152.44	1928	2472.19	1881	3105.43	2271	1368.34	1114	1464.84	719	1933.84	923	2873.44	2146	1697.3	1147	2579.62	2772	2832.58	2386	2485.52	1916	4339.17	4096
15	3	GNL	15	2648.42	1615	3499.97	2450	3322.5	2359	3422.17	2250	3910.09	1979	3588.06	2803	1758.8	1339	3059.99	2736	2124.94	1487	3280.01	2416	5244.15	2105	5094.26	1854	2350.9	1888	2979.47	2370	1413.04	1079	1411	717	2023.97	1029	2753.26	2151	1676.58	1196	2606.39	2808	2760.06	2375	2557.06	1924	6583.77	3792
1	4	HHL	AL	2384.18	2438	2573.73	2230	3089.41	2820	3076.88	2250	2357.3	2208	2166.26	2685	1173.15	1199	2140.71	2148	1734.45	1645	1901.66	2305	2158.92	1927	2430.56	2189	2055.6	1777	2583.39	2148	1636.91	1394	911.845	654	2062.65	1481	3078.6	2630	1101.56	1024	2179.05	2730	2573.87	2413	2050.85	1907	7668.15	6155
2	4	HHL	AL	2470.24	2466	2605.49	2222	4246.63	2657	2983.92	2214	2231.95	2201	2320.99	2889	1106.66	1124	3204.51	2128	1751.46	1597	2263.48	2038	2113.49	1914	2507.16	2058	2034.23	2043	2470.06	2167	1644.26	1404	927.584	737	2078.53	1423	2974.43	2714	1152.36	975	2187.08	2708	2446.42	2571	1968.64	1791	6582.82	5937
3	4	HHL	AL	2474.34	2460	2652.62	2142	3155.21	2652	3136.41	2369	2303.7	2059	2345.19	2796	1418.98	1171	2016.48	2017	1897.88	1562	2363.62	2167	2081.43	2000	2465.3	1983	1990.58	1794	2423.89	1973	1567.66	1279	945.423	710	1875.14	1397	2946.65	2691	1154.14	1000	2345.71	2322	2415.23	2477	1895.36	1782	6841.71	5774
4	4	CALSEPA	17	3642.98	2599	4724.12	2333	3081.85	2815	3151.66	2487	3266.53	2212	3257.75	2906	4149.63	1244	9075.81	5272	3948.25	1762	5321.96	2436	6104.77	2202	4211.01	2229	4362.08	2433	4478.64	2086	3743.26	1357	3321.56	758	2581.29	1320	2795.31	2735	1951.1	1017	4970.31	2773	4661.46	2441	2584.3	1767	8382.5	5958
5	4	CALSEPA	17	3579.19	2578	4876.33	2426	2985.31	2657	2610.29	2285	3426.23	2113	3449.38	3117	4609.96	1210	8231.21	5320	3853.58	1728	6406.51	2364	5199.99	2163	4108.64	2121	3931.16	2442	4388.83	2082	3587.08	1327	2713.74	774	2627.4	1262	2799.66	2703	2062.96	1034	4845.58	2735	4340.73	2460	2510.43	1721	8233.71	5953
6	4	CALSEPA	17	3601.57	2510	4109.68	2267	3007.59	2493	2238.24	2090	3342.39	2045	3531.62	3098	4533.9	1153	7314.55	3235	4923.73	1648	6638.04	2293	4622.12	2109	4019.49	2058	3715.69	2335	4440.9	2027	3255.18	1282	2787.93	780	2330.73	1210	2895.36	2687	2229.27	1034	5104.94	2633	4847.56	2376	2480.89	1666	7678.39	5627
7	4	AMA	18	1944.47	2126	1934.92	2123	1400.12	2059	1257.54	2068	1634.4	1886	2080.42	2769	1006.55	1075	2001.59	1888	1368.23	1449	2287.58	1767	1353.38	1886	952.376	1630	1580.03	2014	1713	1994	1003.68	1234	653.107	774	1239.73	1143	2080.82	2552	1122.14	895	1853.56	2529	1940.04	2221	1321.35	1636	4397.58	5271
8	4	AMA	18	2028.32	2256	2041.06	2039	1702.93	2062	1211.23	2011	1464.19	1554	2050.69	2075	1037.94	1055	1849.87	2115	1229.04	1404	2025.38	2121	1221.89	1752	1160.14	1299	1534.26	2034	1577.06	1939	956.663	1209	619.378	651	1255.06	1112	2069.87	2240	963.769	943	1802.51	2413	2007.76	1912	1300.82	1608	4007.74	4949
9	4	AMA	18	2116.42	2217	2209.82	2194	1350.88	2023	1175.96	1973	1316.54	1570	1953.28	2779	997.133	1146	2197.25	2398	1258.17	1396	2070.7	2129	1240.78	1783	974.896	1623	1548.07	1983	1605.68	1902	931.111	1162	609.157	645	1207.97	1051	1866.17	1863	860.619	900	1769.17	2381	1828.56	1942	1303.9	1582	3948.18	4742
10	4	MNA-M	19	5969.32	2395	8976.4	2385	9339.29	2292	6043.97	2091	7279.01	1870	13546.3	2935	8038.21	1234	12026.1	2656	6165.66	1509	14744.2	2617	9324.01	1890	6403.17	1838	7333.71	1891	4189.11	1868	2662.16	1157	3248.13	768	5586.59	982	5551.1	2421	3385.33	1019	5680.83	2424	5893.44	2173	4379.93	1702	10152	4609
11	4	MNA-M	19	7033.81	2152	9386.05	2458	10626.6	2351	6436.46	2144	6950.6	1949	12655.9	2988	6841.36	1323	11433.3	2906	6428.41	1548	14675.1	2701	8550.57	2030	6703.43	1885	7585.64	1883	4329.48	1910	2576.47	1133	3250.58	742	5270.6	895	6309.48	2369	3578.07	1047	5368.83	2423	5690.34	2292	4411.15	1806	10559.4	4399
12	4	MNA-M	19	7391.63	2078	9178.74	2547	9973.59	2442	7550.87	2192	7075.03	2031	12110.3	2999	8372.32	1350	11583.1	2962	6039	1549	15183.9	2758	9878.06	2140	5505.16	1993	5835.18	1999	4036.5	1949	2507.1	1078	3372.18	753	5110.44	813	6069.68	2322	4024.03	1078	5430.19	2583	5332.53	2373	4473.59	1871	11034	4124
13	4	VFA	20	2633.58	2022	4191.24	2490	2722.18	2429	2136.72	2036	2514.46	2108	3541.2	2942	2135.32	1363	3237.84	3049	3092.65	1545	3200.8	2762	2423.59	2189	2897.49	1964	4446.61	2063	2218.21	1912	1709.77	1038	1130.54	737	1689.26	769	3158.8	2271	1794.82	1103	2352.93	2643	2601.62	2436	1890	1879	4353.38	4006
14	4	VFA	20	2603.66	1902	4681.23	2484	3008.17	2525	2178.13	2088	2247.53	2106	4107.86	2920	1650.99	1377	3042.63	3068	3038.08	1564	3159.88	2787	2499.67	2210	2806.74	2035	4284.36	2079	2290.99	1905	1634	1089	1134.53	727	1797.04	830	3065.53	2202	1877.72	1122	2435.83	2600	3237.81	2468	1804.22	1884	4304.66	4044
15	4	VFA	20	2388.07	1696	4089.11	2468	3644.66	2511	2147.32	2295	2257.55	2050	4134.28	2850	1888.98	1403	2846.48	2833	2660.03	1564	3189.11	2802	2600.5	2171	2960.74	1974	4245.87	2072	2296.97	1967	1647.96	1129	1069.73	731	2002.23	941	2995.06	2184	1882.54	1147	2435.83	2715	2640.18	2469	1804.22	1836	4420.37	4075
1	5	VVA mannose	21	3885.73	2493	3913.26	2268	5205.55	2766	3813.7	2341	3617.79	2266	2978.55	2743	1850.99	1260	2987.39	2312	3955.16	1753	4634.44	2427	3699.77	2127	4380.23	2207	5769.62	2300	2571.69	2327	3845.85	1603	1428.51	839	2441.75	1458	3038.45	2891	1308.36	1019	2801.11	2714	3233.41	2685	1941.9	1797	6722.46	5832
2	5	VVA mannose	21	3652.73	2553	3756.52	2324	5385.35	2840	3918.03	2328	3461.9	2276	2937.37	2818	2023.38	1246	3049.03	2351	4145.8	1830	4408.74	2457	3403.33	2130	4406.6	2205	5580.78	2389	2578.24	2260	3665.3	1455	1383.61	839	2452.35	1386	2926.63	2845	1603.03	1019	2959.04	2655	3327.81	2689	2019.54	1783	6428.09	5999
3	5	VVA mannose	21	3794.65	2548	3863.49	2398	5678.37	2879	3891.39	2319	3391.31	2203	2967.76	3002	1929.96	1239	2916.13	2219	3819.3	1793	4525.97	2458	3565.79	2139	4516.32	2159	5425.7	2326	2588.53	2211	3626.94	1409	1415.41	844	2286.55	1364	3305.47	2870	1517.45	1016	2791.41	2660	3295.17	2630	1900.9	1719	6413.48	5932
4	5	ASA	22	7736.55	2543	7159.21	2323	10956.4	2764	4023.43	2443	1862.41	2152	6516.91	3021	2314.44	1205	4860.41	2207	1462.35	1694	4592.36	2289	2512.78	2071	14918.1	2072	4000.68	2214	1855.41	2113	6669.66	1347	9357.55	814	7849.14	1294	15682.8	2804	1463.97	981	3065.06	2502	2368.07	2412	4011.14	1678	7085.05	5569
5	5	ASA	22	7447.38	2573	7087.17	2280	9928.1	2612	2163.84	2217	1804.74	2102	6388.43	3053	2368.46	1170	4963.64	2188	1434.17	1651	4392.08	2214	2490.27	2011	14638.2	1943	3888.11	2156	1798.47	2061	6356.5	1315	9371.3	817	7554.07	1264	15840.6	2766	1478.15	985	3029.12	2547	2406.84	2441	3918.01	1658	6866.66	5463
6	5	ASA	22	7448.38	2494	6921.07	2189	9737.3	2466	2075.14	2178	1728.87	2017	6583.67	2990	2278.74	1123	4881.64	2053	1337.55	1535	4323.64	2165	2448.18	1962	14496.2	1871	3850.91	2140	1747.42	1984	6269.13	1267	9540.15	807	7426.14	1190	15555.9	2683	1455.46	970	2898.62	2456	2380.36	2371	3989.05	1612	6913.85	5336
7	5	GSL II	BSL II	2493.3	2251	5957.77	1895	5134.15	2105	1992.31	2031	12916	1621	4114.91	2188	2144.24	936	2067.05	2045	2036.13	1045	1957.66	1603	995.52	1884	1611.72	1583	2822.73	2067	2318.07	1847	1447.55	960	554.38	807	2475.66	1116	2768.67	2583	1569.77	929	1804.47	2276	2376.48	2132	2522.95	1573	5664.54	5013
8	5	GSL II	BSL II	2620.03	2304	3162.98	1883	6317.43	2004	1312.26	2052	10225.3	1672	2717.67	2614	2057.41	977	2150.21	2204	1148.51	1412	2420.03	1595	914.343	1330	1377.05	1466	2762.95	1883	2184.91	1657	1116.91	913	1137.75	607	2491.45	1088	2413.37	2557	1752.07	885	1875.42	2258	2101.39	1968	2417.99	1537	5254.52	4660
9	5	GSL II	BSL II	2604.02	2325	3280.37	1947	5410.39	2046	1404.19	1948	11626.6	1583	7217.93	2223	2050.05	1034	2067.05	2465	2027.65	1087	2670.3	1732	1031.68	1792	1477.41	1510	2596.17	1961	2165.89	1788	811.642	1109	589.709	769	2516.89	1008	2514.26	2401	2143.96	843	1836.12	2240	1915.81	2093	2332.03	1518	5577.48	4057
10	5	LEL	TL	8304.32	2339	10945	2346	11158.1	2240	7230.25	2034	3261.82	1800	8753.76	2714	4998.38	1192	10759.5	2639	3392.04	1433	7725.18	2378	4596.7	1794	8655.95	1717	14503.4	1871	5155.81	1840	7594.48	1115	7507.1	762	2585.1	936	14203.2	2405	3739.49	957	2429.68	2190	2724.88	2134	5748.64	1567	5785.62	4017
11	5	LEL	TL	7572.47	2144	10575.5	2446	11648.7	2293	6979.83	2165	3430.87	1856	9038.6	2801	5070.33	1278	12240.5	2795	3570.78	1405	8433.37	2625	4685.72	1884	8950.83	1816	14180.7	1884	5191.93	1806	7028.22	1029	7566.52	737	2436.32	871	13280.7	2358	3800.43	981	2432.06	2186	2871.3	2276	5716.64	1686	5844.49	4054
12	5	LEL	TL	7242.92	2026	10448.5	2476	11929.7	2320	7062.46	2167	3479.5	1984	9251.66	2850	5159.07	1332	13109.9	3006	3394.74	1457	8219.42	2563	4682.38	1989	9125.53	1863	14364.3	1891	5327.09	1760	7223.96	1014	7107.45	747	2591.41	796	12614.4	2335	3883.53	1006	2543.65	2396	2538.9	2405	5898.23	1735	5430.46	3878
13	5	STL	PL	5273.01	2047	10734.5	2380	10241.1	2325	4919.38	2233	4321.65	2034	11071.6	2833	10699.7	1395	6239.52	3052	3694.51	1500	7821.21	2641	5381.03	2115	8858.47	1823	5719.78	1871	3873.23	1712	2879.81	932	2916.09	695	4885.25	731	14445.7	2343	5037.31	1060	2452.25	2293	2928.83	2415	4009.03	1735	7149.63	3697
14	5	STL	PL	5394.4	1920	9370.45	2450	10627.7	2470	4827	2326	4112.1	1929	11148.5	2729	12287.3	1413	6340.35	3024	3787.04	1502	7975.81	2678	5161.19	2120	8306.87	1866	5760.75	1978	3818.35	1585	2260.32	946	2747.73	712	4713.47	732	14284.8	2145	4701.36	1063	2484.47	2302	2923.94	2532	4108.46	1746	7206.12	3896
15	5	STL	PL	5263.42	1735	9487.58	2443	11346.1	2557	4995.96	2393	4471.18	1968	10843.1	2682	13005.9	1387	5643.45	2845	3963.08	1484	7673.39	2720	5512.93	2116	8584.67	1895	5781.74	1911	3759.75	1666	2410.07	988	2688.19	698	4886.34	815	13710.4	2193	4693.55	1059	2586.04	2410	3052.86	2431	4095.91	1660	8531.73	3929
1	6	UDA	26	1657.73	2194	1766.64	2061	2115.52	2692	2110.47	2302	1765.37	2219	2117.38	2782	1336.65	1114	2198.41	2241	1336.85	1682	2026.73	2303	1819.24	2110	2023.54	1882	1814.91	2187	1967.4	2375	1201.04	1543	668.505	862	1338.71	1361	2220.63	2853	885.713	983	1688.49	2540	2195.34	2535	1207.8	1546	4360.2	5450
2	6	UDA	26	1729.41	2239	1791.77	2094	2271.03	2782	2146.82	2351	1737.88	2244	2112.1	2791	1406.2	1117	2137.55	2285	1371.39	1733	2024.64	2240	1924.09	1766	2092.72	1891	1924.09	2369	1936.5	2338	1147.48	1446	693.227	880	1382.43	1351	2206.42	2864	914.384	974	1682.34	2557	2227.08	2568	1187.21	1512	4525.92	5550
3	6	UDA	26	1719.17	2227	1789.91	2132	2230.64	2828	2034.74	2225	1688.2	2192	1993.7	2790	1263.84	1090	2044.1	2231	1350.46	1714	2083.26	2278	1798.7	2025	2507.8	1800	1871.12	2376	1851.01	2274	1139.24	1443	676.746	858	1333.25	1305	2244.67	2854	867.282	973	1675.18	2530	2219.91	2554	1156.82	1507	4426.05	5536
4	6	PWM	PWA	1818.5	2377	1761.52	2256	2149.11	2738	2055.06	2290	1636.66	2170	2168.39	3079	992.81	1211	1785.62	2172	1440.52	1723	1894.77	2326	1817.47	1836	1515.93	2069	1808.24	1881	1777.96	2249	1058.64	1428	662.767	871	1319.72	1223	2259.8	2873	863.55	979	1691.67	2554	2261.63	2573	1245.59	1589	4056.33	5307
5	6	PWM	PWA	1756.69	2409	1690.06	2158	1957.97	2590	1910.43	2180	1605.32	2089	2083.48	3052	980.503	1191	1732.29	2158	1335.14	1676	1833.38	2253	1775.42	2063	1444.13	1973	1677.98	2115	1690.65	2164	1020.94	1369	665.744	851	1248.47	1213	2199.19	2854	872.661	975	1679.52	2499	2157.36	2550	1196.21	1573	4163.71	5282
6	6	PWM	PWA	1786.63	2354	1621.49	2058	1884.14	2449	1910.43	2242	1581.06	2038	2052.14	2989	910.76	1125	1759.98	2147	1204.18	1555	1788.37	2211	1809.27	1932	1394.9	1875	1665.67	2192	1677.75	2093	1008.04	1335	670.705	836	1229.33	1118	2178.98	2745	847.352	958	1643.07	2369	2106.74	2495	1179.07	1542	4071.67	5216
7	6	WGA	28	3919.22	2334	5801.64	2155	5331.45	2288	3883.81	2161	3483.79	1904	3968.46	2790	2391.79	1076	4719.38	2082	2951.14	1456	6516.92	2246	3679.79	1933	3072.44	1715	2855.98	2106	3498.95	2113	1918.61	1292	2686.9	820	3230.33	1105	9250.65	2709	2285.42	956	2293.11	2262	2862.55	2415	2219.65	1492	6884.01	4801
8	6	WGA	28	4391.31	2386	6981.36	2231	5570.59	2122	3700.94	2094	3216.85	1733	3956.95	2648	2374.47	1077	4812.12	2152	2764.75	1419	6635.63	2310	3711.31	1810	2979.98	1598	2833.92	2057	3279.13	2020	1904.74	1271	2828.83	837	2970.72	1053	9414.96	2626	2435.47	943	2355.64	2242	2733.65	2330	2210.77	1452	6567.47	4557
9	6	WGA	28	4222.07	2390	6027.29	2223	5359.59	2185	3578.17	2063	3201.15	1702	4085.71	2715	2358.16	1145	5126	2421	3025.47	1438	7134.88	2379	3635.65	1762	3010.45	1664	2609.05	1982	3486.15	2095	1808.7	1242	2686.9	786	2566.52	1005	9570.51	2548	2286.38	921	2249.83	2197	2706.72	2238	1994.93	1431	6291.43	4474
10	6	DSL	29	2882.75	2138	5823.45	2264	3301.8	2187	2888.26	1859	2365.41	1764	10880	2675	2546.65	1234	5894.33	2552	2062.8	1453	6579.51	2342	3102.41	1799	6489.16	1697	8969.7	1867	6265.34	1896	1977.22	1161	7969.96	800	2407.56	939	9077.52	2419	1891.57	938	2063.64	2154	2814.75	2299	2368.38	1441	6580.96	4158
11	6	DSL	29	2551.24	2084	5881.41	2297	3364.42	2308	2795.64	2126	2441.64	1902	11169.9	2799	2685.5	1321	6064.03	2756	2108.11	1463	6765.52	2496	3160.2	1907	6282.26	1785	9099.16	1871	6500.62	1911	1953.47	1103	7885.12	771	2279.05	884	9046.82	2357	2012.9	993	2160.7	2265	3041.96	2390	2504.92	1503	6526.94	3994
12	6	DSL	29	2465.46	1986	5873.29	2318	3569.24	2359	2932.62	1994	2595.25	1981	11540.6	2898	2767.38	1366	6430.72	2934	2087.84	1493	6853.75	2685	3394.85	1992	6615.15	1833	9213.59	1967	6319.64	1869	1946.68	1075	7805.94	761	2302.93	768	8953.56	2359	1978.71	1011	2389.01	2451	3123.58	2502	2528.55	1549	6243.59	3960
13	6	HPA	30	11413.7	2048	5612.34	2438	23159.7	2480	7508.78	2350	8153.39	2081	5591.3	2942	5597.52	1413	13747.9	3316	12577.5	1563	7034.25	2771	8474.37	2207	10157.2	2035	6839.43	2235	3707.72	1828	2236.4	1044	7819.39	760	12752.5	713	11023.2	2401	6355.83	1046	7997.29	2618	10373.4	2704	7490.96	1515	7114.46	4148
14	6	HPA	30	10144.7	1885	5667.07	2424	22823.3	2460	6977.88	2416	8211.9	2080	7410.49	2851	5859.77	1458	14061.3	3279	12475.5	1556	7264.49	2824	8492.72	2232	9528.32	2037	6518.36	2183	3509.76	1706	1892.21	959	8065.5	748	12244	695	10859.1	2334	6230.24	1051	7837.26	2698	10905.7	2751	7971.48	1493	7180.18	4193
15	6	HPA	30	8674.28	1672	9752.09	2481	19225.3	2353	6517.94	2381	7586	2008	7069.68	2854	5500.67	1418	12547.6	3160	10616.1	1541	6820.18	2895	8582.42	2154	10376.4	1945	6373.62	2109	3557.03	1560	1651.44	906	7575.96	716	13139.7	736	10424.6	2237	6176.9	1070	7972.84	2705	9778.79	2747	8099.97	1461	5539.6	4169
1	7	VVL	VVA	3211.09	2335	2526.77	2133	4799.93	2585	5476.19	2357	1979.01	2139	2210.68	2639	1758.56	1244	2208.68	2246	2123.22	1702	2634.45	2280	2118.41	1902	2148.35	2031	2826.88	2107	2142.87	2432	1679.74	1384	1087.01	851	2573.44	1266	4077.21	2809	1085.6	963	2051.43	2730	2221.59	2522	1420.98	1446	5807.81	5147
2	7	VVL	VVA	3267.72	2373	2555.09	2197	5597.84	2739	5559.53	2300	1996.83	2199	2519.25	2421	1926.23	1225	2156.78	2284	2129.41	1580	2610.74	2116	1943.79	1988	2253.12	2091	2815.9	2050	2132.82	2425	1589.32	1295	1062.9	874	2621.21	1257	4036.71	2853	1101.76	976	2012.45	2723	2233.95	2524	1549.74	1381	5633.98	4726
3	7	VVL	VVA	3352.67	2332	2563.58	2164	6015.48	2692	5464.7	2236	1963.07	2175	2160.97	2656	1812.45	1211	2101.89	2243	1888.23	1618	2571.57	2155	2021.62	1799	2201.23	2079	2954.6	2187	2075.56	2331	1472.78	1342	1012.66	855	2509.05	1230	3926.63	2781	1204.43	937	2065.69	2719	2305.24	2543	1364.07	1395	5371.2	4943
4	7	DBA	32	2143.76	2120	3675.75	2196	6096.91	2622	2728.05	2194	3516.92	2049	3065.9	2399	2045.08	1225	2896.29	2234	3160.63	1533	4056.72	2148	1891.42	1840	2870.67	1968	2690.92	2283	2477.76	2263	2076.19	1354	1241.99	731	3375.15	1200	4917.58	2642	1325.23	929	2058.45	2571	19078.4	2580	1376.86	1388	6131.11	4228
5	7	DBA	32	2311.15	2094	4104.84	2078	4879.9	2514	2637.58	2242	3454.01	1873	2580.32	2589	2107.29	1173	3108	2089	2869.06	1630	3278.23	2185	1873.54	1924	2832.21	1826	2683.76	2192	2485.22	2170	2082.41	1340	1060.47	834	3218.94	1160	3496.92	2755	1295.95	965	2003.02	2529	18720.6	2506	1326.96	1329	5860.04	4093
6	7	DBA	32	2132.71	2207	3657.05	2007	5564.87	2374	2627.89	2029	3225.4	1923	2657.41	2256	2411.76	1124	3253.14	2064	2773.81	1525	3435.68	2154	1844.92	1914	2724.9	1816	2613.11	1984	2476.51	2124	2099.81	1315	1189.77	716	2599.01	1129	5378.84	2547	1292.81	927	1964.32	2390	19502	2463	1351.5	1336	4585.11	4908
7	7	SBA	33	11341.2	2261	11004.9	2119	4297.49	2221	7762.94	2208	4913.19	1811	4574.88	2491	4400.11	1073	3202.5	2186	9637.31	1419	6747.33	2208	4597.22	1857	7513.91	1694	9219.99	2095	4696.33	2075	4816.98	1302	2739.38	803	2945.77	1075	5613.16	2468	1932.09	932	3326.52	2351	3921.97	2224	3598.37	1340	14997.5	4729
8	7	SBA	33	10560	2369	11562.6	2357	4627.36	2226	7584.19	2145	4733.52	1642	3214.93	2605	5130.56	1054	2820.37	2133	10180.3	1458	7017.45	2232	4183.47	1751	7215.94	1650	9367.27	2113	4449.72	2091	4073.59	1285	5120.37	773	3123.5	1026	5371.38	2459	1851.69	906	3200.89	2318	3546.36	2093	3617.48	1336	14108.1	4536
9	7	SBA	33	10674.9	2376	14526.7	2280	4104.92	2175	8276.17	2058	2186.61	1700	3184.35	2396	4318.15	1150	3310.07	2408	9553.19	1480	7098.76	2383	4581.9	1754	7456.87	1693	9222.54	2001	4627.14	2094	3745.36	1260	3756	808	3165.33	970	5056.42	2331	1910.74	890	3155.67	2222	3597.86	1930	3654.89	1338	13899.7	4356
10	7	PTL I	WBA I	2923.72	2133	2963.64	2278	1429.3	2268	1342.38	2082	1673.02	1739	2066.19	2829	1098.42	1187	2304.35	2701	1548.12	1513	2549.04	2546	2467.97	1867	1773.5	1526	1900.58	2075	1760.57	1853	1051.28	1273	782.578	819	1131.18	929	1906.22	2431	816.703	964	1421.25	2227	1674.47	2342	1101.88	1425	4736.54	4285
11	7	PTL I	WBA I	2742.02	2195	3073.76	2294	1469.42	2337	1597.94	1993	1854.41	1933	3079.95	2636	1158.45	1348	2410.97	2902	1538.89	1505	2976.18	2178	2467.97	1987	2878.18	1596	2035.46	1772	1693.63	2027	969.854	1182	659.537	734	1100.18	870	1829.85	2376	930.007	954	1679.79	2052	1846.33	2367	1185.95	1479	4603.01	4160
12	7	PTL I	WBA I	2488.74	2017	3171.49	2270	1613.54	2439	1437.47	2180	1907.82	1949	2193.25	2880	1266.86	1346	2469.21	3142	1648.56	1540	2712.97	2613	2428.95	2062	1844.85	1900	1999.79	2142	1659.25	1822	987.044	1146	731.009	720	1051.03	811	1844.97	2330	920.882	1048	1620.48	2562	1898.04	2667	1261.86	1466	4629.72	4090
13	7	WFA	WFL	2929.81	2041	12143.9	2503	15753	2504	5762.06	2369	6435.9	2017	9098.08	2854	5579.23	1353	4497.27	3276	3790.71	1571	3127.71	2800	3265.21	2137	3939.44	1958	3339.46	2179	3388.39	1922	1609.48	1134	2764.98	723	4114.39	747	6219.27	2467	2554.19	1101	2570.83	2563	3361.21	2516	2116.42	1543	4642.88	4108
14	7	WFA	WFL	2994.47	1856	12698	2487	15048.2	2322	7057.94	2424	2620.36	2005	9085.3	2792	7093.86	1476	5528.85	3174	4776.83	1466	3237.81	2832	3149.37	2146	2610.28	1917	2878.1	2156	3119.7	1818	1579.04	1020	2815.27	733	4153.58	720	6374.75	2399	2561.32	1114	2582.71	2649	4931.28	2777	2146.42	1566	5587.69	3878
15	7	WFA	WFL	3081.94	1782	14311.8	2461	15718.9	2204	5254.27	2464	3967.7	1914	9794.98	2692	6160.52	1447	3904.01	3159	3724.89	1491	3599.23	2759	2662.26	2105	3751.33	1848	2868.69	2057	2755.71	1704	1428.15	927	2622.03	701	4566.46	744	6156.55	2307	2834.68	1118	2638.57	2703	3890.11	2861	2187.52	1574	14855.4	3827
1	8	CSA	36	4528.25	2235	3196.37	2142	10885.7	2659	2962.33	2424	3388.55	2257	2240.43	2494	5563.76	1278	3089.19	2410	3173.07	1744	2888.13	2462	2448.02	2017	3210.9	2111	8094.25	2291	4765.56	2588	4835.48	1572	2014.15	878	6858.79	1274	8027.56	2895	1679.03	1049	4737.01	2998	4786.54	2700	1524.95	1541	20177.5	5825
2	8	CSA	36	4130.12	2206	2592	2262	17891.5	2682	3122.1	2428	3167.88	2052	2410.47	2434	5108.49	1280	2484.06	2433	3554.87	1747	3285.27	2274	2071.34	2026	3185.52	2149	7803.22	2280	4794.44	2555	4954.05	1558	2375.94	828	6526.05	1290	8769.41	2870	1429.45	1052	4385.47	3027	7892.1	2529	1344.05	1521	11079.6	5792
3	8	CSA	36	2904.01	2120	2477.92	2245	20438.9	2684	3061.81	2299	3152.95	2184	2637.63	2361	4847.66	1292	3905.82	2313	3795.41	1745	2112.42	2402	2107.03	2047	3021.37	2109	7750.09	2349	4522.34	2502	4987.49	1537	2503.63	828	6670.45	1265	9276.89	2831	1647.95	1080	4492.29	3003	5781.91	2654	1302.51	1557	11601	5526
4	8	Black bean crude	37	23229.8	2390	23677	2222	25451	2718	32739.9	2368	21675.8	2116	19081.5	2752	28121.5	1275	16262.3	2367	32227.9	1732	20445.9	2398	11224.6	2002	20912.3	1993	37905.2	2345	36223.5	2387	13554.4	1519	18402.7	873	15115.6	1237	16517.4	2904	11190.5	1073	23345.1	2918	44131.3	2796	27626.2	1529	35166.6	5355
5	8	Black bean crude	37	22473.5	2368	22468.9	2173	25100.4	2575	26215.7	2379	20716	2064	19271.2	2892	30560.8	1193	17261.3	2312	29599.3	1671	20307.3	2303	10802.5	1958	20296.2	1946	37453.8	2265	36315.7	2271	13803.6	1467	16810.3	862	14154.9	1201	15518.7	2875	11818.9	1033	20238.5	2893	43743.1	2727	27574.3	1519	35609.2	5277
6	8	Black bean crude	37	22356.4	2387	23044.1	2093	24634.3	2368	30089	2420	20065.4	1979	18903.8	2887	31041.2	1186	17731.9	2238	29138.1	1564	20801.4	2259	10711.6	1943	20862.8	1856	38554.6	2174	37635.2	2224	13173.1	1435	18536	844	15364.2	1175	16646.8	2907	11777	1009	21749.3	2729	42413.8	2681	28405	1509	37169.2	5201
7	8	GSL-IA4	38	2356.69	2375	2582.72	2108	15200.4	2229	1763.25	2288	2346.7	1876	3206.07	2714	6819.24	1137	3405.2	2367	2295.26	1473	3007.99	2436	2028.46	1938	3695.75	1799	3079.56	2156	2324.87	2279	1585.14	1434	859.498	840	5700.87	1136	9267.37	2816	2010.03	1000	2424.99	2393	2607.16	2497	1772.22	1487	6586.09	4936
8	8	GSL-IA4	38	1716.8	2435	2281.56	2298	16452	2238	1899.01	1981	1990.69	1759	3114.11	2492	5742.51	1178	3682.21	2529	2840	1495	2916.54	2477	1891.99	1811	4069.33	1725	3060.95	2168	2239.55	2196	1157.74	1351	1095.9	769	5610.58	1058	8366.97	2755	1997.88	953	2475.59	2429	2605.14	2555	1639.28	1455	6071.07	4605
9	8	GSL-IA4	38	2089.34	2496	2518.23	2380	11546.6	2257	1985.95	2162	2078.71	1737	3841.95	2668	6638.58	1236	4111.78	2844	2325.08	1499	2775.39	2543	1976.08	1800	3324.94	1743	3808.79	2153	2249.72	2190	1127.99	1364	995.702	833	5921.58	991	8340.63	2659	1924	952	2462.43	2426	2400.7	2374	1749.75	1523	6033.79	4426
10	8	IRA	39	3189.55	2385	2664.61	2430	8611.66	2243	2645.9	2240	4810.65	1825	4114.53	2741	4398.52	1292	4959.34	2968	11475.3	1507	8251.28	2638	4642.63	1898	14975.3	1807	4461.93	2186	3662.26	2150	2666.07	1292	2057.28	788	4149.27	897	6780.65	2599	3738.7	998	2994.54	2401	3570.84	2476	3604.84	1579	5864.22	4007
11	8	IRA	39	3167.37	2195	2786.6	2373	8933.24	2287	2901.68	2311	4672.84	1959	4277.53	2825	4357.51	1342	4921.95	3099	12487.8	1486	8375.29	2673	4809.68	2008	15148.7	1898	4487.14	2184	3518.18	2044	2734.77	1178	2083.04	776	4005.07	865	6831.61	2528	3735.34	1080	3138.89	2587	3943.48	2661	3695.22	1687	5704.1	3965
12	8	IRA	39	3031.33	2048	2581.07	2401	8956.59	2452	5497.71	2271	5010.66	2049	3701.89	2829	4839.94	1406	5022.06	3224	12043	1527	8101.11	2640	4768.7	2126	15001.6	1933	4536.52	2252	3463.79	2003	2593.55	1196	2042.97	766	3916.17	850	6601.75	2539	3947.96	1162	3219.46	2725	4207.57	2820	3626.91	1773	5899.29	4078
13	8	IAA	40	8066.44	2093	3542.72	2680	12165.6	2594	8151.72	2713	3702.14	2102	4674.93	2881	3155.13	1452	7504.07	3358	5455.07	1574	7578.3	2722	3891.66	2170	3273.35	1916	2869.89	2312	3889.02	1958	1747.59	1149	1685.24	758	4468.48	822	9074.48	2488	2441.6	1182	3088.3	2857	3825.9	2913	4308.23	1825	2909.72	4270
14	8	IAA	40	8879.56	2076	3268.65	2698	11995.7	2417	8025.46	2698	3663.8	2045	4514.44	2839	3071.72	1512	6663.26	3473	5929.23	1536	7200.61	2864	3931.52	2176	3770.14	1838	3452.23	2321	3758.4	1849	1584.31	1070	1689.2	738	4102.89	795	8786.82	2402	2491.74	1191	3307.7	2965	3469.64	2991	4110.08	1862	3029.04	4520
15	8	IAA	40	9669.41	1864	3610.48	2590	13507.4	2259	8430.64	2682	3833.21	1988	4363.75	2794	2105.38	1474	6158.61	3199	5195.92	1489	6467.3	2852	4005.41	2065	3107.11	1786	2679.35	2197	3530.8	1756	1443.79	945	1719.88	730	4269.06	831	8933.52	2352	2297.42	1180	3229.34	3017	3377.7	2999	4064.27	1852	2939.7	4678
1	9	HMA	41	2142.25	2331	1799.14	2056	2416.46	2560	2229.83	2401	1860.15	2208	1907.77	2374	1065.21	1284	2107.91	2405	1620.27	1673	2789.67	2485	2063.7	2033	1744.84	2080	1897.34	2261	2528.32	2713	1621.94	1658	894.931	924	1381.05	1321	2559.21	2995	1231.74	1186	2676.16	3079	2640.71	2842	1620.2	1707	5535.62	6034
2	9	HMA	41	2194.74	2381	1956.6	2141	2463.84	2635	2232.73	2373	1905.87	2213	2579.25	2254	1013.6	1280	2198.94	2451	1805.66	1635	2842.32	2493	1887.43	2000	1722.06	1925	1926.05	2299	2521.65	2691	1531.31	1642	887.299	889	1611.52	1313	2601.04	3013	1230.76	1182	2601.33	3029	2600.34	2895	1542.91	1736	6758.05	5280
3	9	HMA	41	2138.36	2399	1860.38	2121	2413.56	2619	2266.58	2278	1743	2155	2011.59	2577	1094.31	1308	2120.11	2404	1670.73	1730	2816	2498	1839.9	2010	1785.44	2006	1906.25	2088	2463.45	2540	1438.76	1594	935.003	884	1468.26	1300	2523.62	3024	1218.94	1149	2740.16	3245	2691.91	2934	1764.4	1721	5230.29	5771
4	9	GHA	42	4586.4	2390	5244.2	2253	20185.4	2772	6647.6	2301	5321.36	2124	3883.82	2616	7931.82	1295	7190.21	2480	6329.82	1710	5190.15	2376	5341.35	2070	4901.68	2040	4590.84	2483	5462.09	2472	3930.28	1558	3603.67	871	6120.03	1260	11865.1	2964	1854.25	1135	3763.29	3148	4078.11	2946	2795.21	1686	10248.7	5522
5	9	GHA	42	4539.9	2387	5109.41	2215	21300.6	2613	5826.25	2343	5819.29	2022	4303.16	2738	8647.44	1243	7529.03	2420	6568.29	1661	5810.89	2488	5649.4	2040	4946.49	2007	4651.51	2358	5411.49	2344	3836.44	1513	3414.15	876	7044.87	1221	7464.06	2910	4291.86	1075	3703.87	3001	4561.93	2946	2708.83	1649	11341.2	5308
6	9	GHA	42	4510.24	2396	4935.52	2100	18662.9	2433	5714.95	2417	5382.33	1969	3562.03	2850	8599.47	1202	7515.04	2369	6535.24	1560	5598.32	2422	5643.8	2038	5454.3	1908	4086.76	2295	5333.29	2300	3808.84	1484	3218.19	869	7499.24	1165	5378.14	2895	4342.79	1032	3646	2868	3983.2	2917	2709.58	1626	11197.5	5257
7	9	MNA-G	43	4307.73	2317	3797.81	2069	6698.34	2164	3181.6	2251	2773.68	1846	4471.32	2635	3511.19	1130	5703.07	2272	2350.29	1448	4029.38	2350	3179.57	1897	2686.43	1713	3403.88	2096	3015.59	2257	2132.5	1440	1487.77	832	3544.71	1096	6308.64	2793	1771.16	999	2261.56	2612	2879.68	2614	1945.84	1562	5699.89	4955
8	9	MNA-G	43	4351.16	2391	2915.25	2108	6401.71	2185	3125.99	2088	2804.29	1745	3860.31	2559	3391.36	1124	5826.4	2434	2268.28	1455	3990.53	2435	2787.02	1823	2412.27	1658	3237.43	2043	2833.89	2225	1967.41	1402	1696.82	782	3615.61	1046	5938.1	2709	1807.65	976	2187.86	2579	2808.89	2516	1953.43	1522	5206.7	4603
9	9	MNA-G	43	4966.15	2470	3161.81	2241	6170.69	2265	3111.73	2162	2750.13	1748	3786.14	2586	3798.56	1194	6266.17	2515	2767.9	1419	4011.03	2410	2689.1	1772	2565.37	1694	3576.57	2007	2766.49	2167	2028.95	1377	1912.7	774	4119.43	984	5870.04	2676	1887.92	984	2160.86	2465	2441.82	2411	1927.2	1583	5622.13	4089
10	9	RCA I	RCA120	5188.17	2431	9583.07	2372	7672.31	2242	2734.74	2440	6454.47	1883	4550.09	2752	4714.97	1291	6303.44	2791	4352.63	1516	4307.06	2471	4603.71	1844	3640.51	1754	5408.16	2093	5888.08	2249	3070.05	1369	3541	817	4522.01	936	7204.89	2656	3890.58	1114	3940.39	2583	4681.04	2529	5414.23	1737	6853.85	4259
11	9	RCA I	RCA120	4786.8	2236	8440.54	2427	7415.44	2276	2798.65	2626	6623.14	2017	4595.91	2850	3006.05	1395	7131.8	3142	5552.09	1520	4731.1	2582	4683.71	1958	3731.22	1784	5461.71	2113	5585.15	2101	2751.85	1320	3021.68	794	4326.31	935	7502.99	2583	3280.95	1173	4048.68	2823	4969.07	2769	5128.3	1822	6269.83	4100
12	9	RCA I	RCA120	5094.63	2154	8852.56	2464	7622.19	2373	2935.23	2376	5041.54	2077	5119.64	2838	2609.67	1471	6572.24	3226	4973.5	1548	4399.53	2558	5260.12	2061	3941.63	1780	5364.69	2124	5886.81	2059	3010.23	1251	3085.33	776	4509.05	914	8064.19	2660	3521.34	1237	4472.06	2949	5186.72	2944	5286.76	1923	6546.3	4105
13	9	GSL I-B4	BSL I-B4	1982.35	1992	2283.39	2322	4946.34	2360	1461.35	2229	1782.22	2052	3691.8	2293	2889.41	1391	2939.21	3253	1351.45	1275	1931.96	2471	2110.91	1705	1457.73	1662	1653.97	1716	2282.68	1929	1217.5	1131	757.074	732	3005.85	867	3940.03	2494	1369.75	1227	2517.88	2942	2830.31	2891	2191.56	1823	3541.62	4255
14	9	GSL I-B4	BSL I-B4	2197.54	1966	2415.98	2329	2944.36	2255	1522.58	2296	1754.92	2040	3190.4	2676	2266.89	1454	3687.16	3438	1223.58	1468	1941.16	2389	1837.12	2082	1411.95	1614	1576.41	2062	2092.55	1864	1173.98	1059	729.586	715	2909.04	880	4028.37	2449	1362.18	1225	2597.88	3009	2953.56	2967	2218.54	1949	3860.96	4631
15	9	GSL I-B4	BSL I-B4	2543.14	1780	2424.68	2263	2485.12	2095	1546.48	2299	1799.4	1969	2465.58	2653	2013.27	1498	2622.88	2886	1302.69	1356	1979.8	2405	2033.35	1751	1483.9	1379	1540.9	1866	1990.61	1769	1253.01	901	738.748	727	3175.26	911	3796.03	2370	1598.94	1279	2693.01	3070	3109.24	3046	2273.51	1970	4047.31	4696
1	10	EEL	46	2164.82	2125	2654.95	2008	4256.96	2485	2219.32	2506	2679.1	2157	5089.42	2372	1678.19	1277	6755.39	2494	3327.44	1647	3672.45	2390	3503.73	1924	2225.76	1819	3002.75	2193	3554.8	2704	2546.02	1650	1554.92	864	3234.51	1321	7349.54	2873	2575.71	1204	3098.21	2731	3097.16	2735	2206.53	1739	9465.4	6336
2	10	EEL	46	1709.85	2096	2651.21	2073	4257.81	2545	2231.21	2392	3077.5	2105	4419.64	2425	1867.77	1222	6486.16	2595	3206.68	1644	4041.42	2621	3729.74	1946	2277.84	1851	3037.12	2191	3509.62	2656	2572.54	1575	1582.42	875	3161.73	1305	6710.04	2813	2741.81	1178	3078.23	3232	3324.24	2740	2263.29	1734	7381.02	5987
3	10	EEL	46	1801.89	2107	3279.77	2117	4566	2529	2340.73	2377	3180.35	2074	3740.36	2541	2233.47	1326	3370.96	2535	3211.48	1651	3329.35	2453	3766.19	1965	2219.51	1905	3157.94	2191	3456.57	2599	2520.48	1548	1590.28	842	2697.62	1282	7114.5	2988	2649.3	1144	2989.92	3130	3168.64	2642	2291.66	1722	7061.83	5939
4	10	PNA	47	1810.48	2028	3516.8	2078	2895.51	2636	1443.04	2288	2979.19	1851	2680.44	2540	1168.84	1231	3302.41	2320	2679.79	1374	3093.15	2424	3386.1	2049	2832.06	2025	2116.31	2298	8073.95	2519	5611.87	1542	4437.97	849	3032.65	1250	5861.37	2841	1541.75	1046	3477.97	3056	5411.61	2775	1311	1707	4540.46	5716
5	10	PNA	47	1331.65	2283	3489.75	2059	3133.44	2459	1063.2	2239	2942.29	1768	2553.08	2585	1232.22	1135	3669.5	2392	1352.97	1494	3428.78	2436	3875.45	2021	2893.23	1949	2083.97	2139	8238.09	2398	5397.87	1487	3432.36	832	3234.93	1210	5724.86	2817	2308.76	1017	3452.19	3014	5474.77	2725	1333.65	1572	4375.46	5520
6	10	PNA	47	1479.09	1991	3487.72	1994	1901.76	2212	1511.2	2168	1974.62	1891	2604.26	2585	1202.97	1067	3198.62	2389	2324.72	1325	4174.79	2367	3580.85	1990	2724.49	1904	2277.32	2145	8111.35	2361	4136.7	1448	5896.52	794	3044.16	1153	6205.09	2852	2099.93	980	3311.68	2909	5758.37	2690	1257.46	1516	4397.27	5468
7	10	BPL	48	6805.81	2226	3756.25	1914	25437.1	2195	3637.52	2138	7364.8	1614	10048	2503	9073.38	1086	5568.01	2285	3214.43	1423	3515.75	2305	3047.87	1901	3971.77	1846	5071.91	2228	3698.18	2332	2947.63	1378	1674.04	827	11732.6	1122	15734.8	2739	2955.19	1026	3430.91	2747	3474.68	2787	3145.61	1556	7997.54	4917
8	10	BPL	48	3852.66	2221	4225.55	2080	29609.8	2157	3717.78	2169	13145.4	1618	9073.84	2546	8975.16	1058	5765.54	2314	3496.87	1402	3536.28	2408	2863.45	1850	3307.69	1738	4638.57	2180	3620.1	2216	1447.37	1405	665.756	777	11732.6	1067	14551.8	2749	2858.14	981	3319.59	2554	3382.39	2642	2970	1508	12674	4491
9	10	BPL	48	5034.1	2264	3863.57	2192	24523.6	2096	3623.5	2192	8871.05	1634	8903.98	2514	11174.2	1147	5682.6	2506	4528.11	1375	3445.96	2430	2758.07	1794	3625.64	1733	5070.09	2055	3550.42	2165	1780.67	1397	1454.08	779	11386.7	998	13598.1	2689	2909.52	1010	3169.26	2444	3333.86	2428	2694.85	1577	6270.86	4549
10	10	ABA	49	2675.93	2301	2989.05	2219	3442.73	2204	3055.42	2252	2753.39	1881	2499.56	2585	3389.72	1269	4394.2	2773	2536.11	1446	2784.94	2457	2276.53	1836	2163.22	1700	2193.87	2083	3752.62	2232	1764.43	1409	1867.21	826	2244.97	972	4885.32	2673	2632.92	1102	3252.24	2684	2865.83	2574	3590.59	1769	6451.14	4375
11	10	ABA	49	2518.34	2155	2981.84	2245	3674.94	2249	3177.35	2314	2631.95	1950	2503.54	2600	5594.39	1391	4866.7	3063	2669.37	1461	2720.39	2452	2554.25	1880	2147.43	1697	2284.89	2032	3452.84	2142	1502.12	1318	1741.94	802	2126.98	960	4839.78	2631	2914.53	1207	3544.44	2961	2931.46	2809	3447.94	1865	5921.68	4157
12	10	ABA	49	2577.05	2068	4054.07	2400	3841.69	2322	3050.04	2306	3033.11	2079	2440.82	2649	4377.98	1467	4941.31	3240	2600.66	1487	2932.77	2499	2516.17	1951	2141.86	1669	2321.12	2062	3750.48	2092	1602.76	1281	1642.37	768	2238.76	965	4726.96	2636	2853.12	1259	3653.48	3110	3131.55	2954	3973.91	1955	5876.18	4220
13	10	Jacalin，AIA	50	2486.65	1761	2952.19	2117	2690.06	2154	2258.32	2241	1942.01	2083	5153.42	2608	2636.08	1460	6788.01	3397	1324.49	1240	3903.37	2382	1914.75	1665	1956.77	1457	2111.16	1666	2466.79	1910	1857.59	1129	1397.07	667	4236.59	929	3612.61	2507	2077.67	1239	2575.6	3056	2728.82	2948	1672.56	1824	3351.14	4431
14	10	Jacalin，AIA	50	2832.33	1898	3016.53	2068	2929.4	2118	2152.96	2250	1976.08	2053	5891.98	2644	2605.4	1554	7229.12	3482	1479.13	1287	4059.92	2408	1932.11	1943	1944.9	1387	1707.38	1855	2341.4	1842	1779.91	1055	1342.7	682	4344.49	941	3697.09	2436	1993.82	1296	2624.26	3149	3460.71	2711	1723.86	1993	3618.97	4708
15	10	Jacalin，AIA	50	2986.25	1757	3316.79	2193	4491.44	2015	2156.4	2257	3781.81	2041	5142.43	2630	2674.16	1429	7388.85	3311	1485.85	1279	4149.25	2313	2109.33	1913	1614.2	1523	2601.72	1737	2212.68	1740	1585.72	950	1668.94	687	4632.56	971	4524.66	2427	1872.7	1363	2714.32	3172	2958.63	3096	1910.27	1977	4372.52	4642
1	11	ACL	ACA	3597.27	2348	6913.55	2166	3047.88	2503	2674.29	2534	3011.18	2209	2987.28	2459	2138.97	1348	4548.7	2687	8349.76	1883	16846	2638	3433.96	2108	3803.18	2275	10159.2	2348	2576.68	2796	2270.47	1665	1758.16	876	3571.97	1402	5825.34	2932	3316.7	1241	4291.88	3341	4524.17	2962	3601.32	1788	6294.01	6431
2	11	ACL	ACA	3420.39	2399	6622.46	2260	2733.45	2604	2418.21	2544	2843.89	2162	3778	2713	2209.89	1347	4548.7	3074	8200.14	1864	14410.9	2690	3132.69	2116	3804.31	2325	10557.8	2440	2550.6	2816	2363.01	1677	1895.28	859	3354.12	1391	5819.58	2989	3554.47	1254	4259.01	3350	4436.51	3100	3662.8	1806	5390.28	5999
3	11	ACL	ACA	3555.83	2387	6628.52	2286	3065.71	2609	2298.27	2701	2890.65	2105	3560.84	2737	2015.2	1460	4715.02	2768	7819.39	1842	16323.9	2697	3139.49	2094	3824.69	2278	10198.8	2476	2494.24	2726	2231.78	1593	1809.48	853	3293.03	1341	6141.16	2977	3529.27	1194	4077.12	3258	4549.37	3110	3652.23	1784	6135.45	6213
4	11	MPL	52	2041.54	2242	2292.09	1932	2345.91	2589	2160	2309	1801.55	2035	2436.81	2653	1248.8	1230	2717.93	2239	1749.22	1501	2522.58	2126	1798.45	2033	1690.83	2086	1850.8	2237	2571.8	2638	1716.87	1579	1048.55	832	1967.17	1295	3038.14	2890	1452.69	1118	2625.78	3232	2937.37	2980	1419.29	1697	3968.07	5946
5	11	MPL	52	2449.66	2112	1905.51	1975	2400.23	2412	2121.35	2246	1703.9	1944	2368.79	2665	1148.82	1203	2778.1	2335	1838.77	1548	2539.88	1998	1793.6	2026	1652.05	1990	1788.76	2199	2513.48	2566	1730.86	1366	1020.56	802	1951.82	1256	2969.65	2858	1289.68	1073	2564.91	3157	2932.21	3003	1339.36	1726	3850.7	5642
6	11	MPL	52	2193.24	2044	2037.63	1953	2506.76	2228	2002.28	2135	1760.96	1878	2343.55	2701	1199.74	1084	2334.68	2272	1869.3	1515	2375.04	2136	2004.96	1769	1620.06	1921	1793.6	2091	2478.49	2490	1678.38	1538	993.729	747	1967.17	1195	3065.3	2478	1409.36	1071	2497.85	3029	2966.26	2962	1425.75	1603	3768.29	5671
7	11	PHA-L	53	15354.5	2267	18995.1	2030	21707.6	2202	29907.6	2266	7298.1	1833	20195	2615	24969.3	1154	16649.8	2250	20936.4	1450	17784.1	2462	6085.45	1925	21955.2	1882	32030.1	2146	46830.7	2396	8769.63	1518	11634.4	834	15881.9	1161	14273.1	2894	11593.3	1053	20932.3	2903	45313.5	2897	29951.6	1596	32423.3	5277
8	11	PHA-L	53	15988.3	2280	19637.7	2233	23755.4	2230	30008.9	2260	6875.21	1724	21394.2	2539	24562.9	1192	17025.9	2363	21328.4	1419	17714.7	2509	5991.44	1867	22416.6	1757	30686.2	2206	49313.6	2282	8838.56	1456	11656	817	15530.9	1112	14302.5	2822	11244.5	1008	20781.6	2706	44279.3	2727	30442	1538	31416.1	4959
9	11	PHA-L	53	16246.1	2290	19342.8	2116	22839.7	2177	29986.4	2247	6759.41	1748	20386.3	2612	25608.2	1232	15527.3	2665	21079.5	1423	17284.2	2490	5641.32	1870	22582.5	1824	32105.9	2218	48426.1	2229	8898.87	1429	11691.9	824	14941.9	1064	14691.5	2684	11627.3	1066	20737.9	2515	45487.3	2554	30683.2	1604	31059.6	4510
10	11	PHA-E	54	14665.6	2163	21459.1	2162	19991.2	2228	26219.3	2428	9340.95	1838	18388.7	2577	21708.5	1321	16137.5	2795	20844.4	1373	15621.9	2484	7131.22	1794	16820.8	1762	22862.3	2143	36259	2250	7915.19	1363	11772.9	796	9525.61	984	14361.5	2614	10103.3	1047	13430	2649	40981.4	2484	23990	1727	26440.1	4349
11	11	PHA-E	54	14686.5	2076	19351.5	2331	23529.1	2272	25412.9	2511	9263.63	1927	15919.3	2524	20855	1416	14831.2	3108	21073.9	1379	15854.7	2515	7040.87	1914	17444.1	1710	23110.3	2058	37900.8	2118	7890.23	1306	12452.4	738	10700.6	966	14520.2	2605	8876.79	1222	13934.6	2898	39714.1	2729	23808.4	1812	26923.4	4193
12	11	PHA-E	54	12978.2	1952	21446.9	2412	21167.4	2192	27781.3	2367	9306.06	2072	15880.7	2525	22361.2	1487	18629.5	3431	20973.6	1394	14992.5	2424	7224.34	1958	17971.4	1683	24783.7	2081	37889.7	2097	7316.14	1192	10792.6	769	12584.4	964	15104.5	2629	9116.78	1250	14288.4	3050	38057.9	2904	24004.5	1880	27378.3	4238
13	11	ECL	55	2173.11	1915	3646.53	2202	2745.94	2102	2248.37	2305	2925.14	2061	2406.45	2497	2195.59	1499	4830.29	3557	1961.29	1403	2873.47	2224	2835.62	1991	1829.1	1568	2971.94	2057	3328.71	1968	1769.5	1101	1232.24	689	2097.56	968	3731.93	2458	2286.53	1305	4627.48	3100	4739.01	2855	2664.99	1970	4380.64	4260
14	11	ECL	55	2190.65	1897	3894.05	2199	2742.72	2112	2137.88	2485	3024.55	2033	4785.34	2626	2604.86	1601	5176.68	3558	1933.49	1369	2870.38	2434	2784.27	2002	1723.6	1478	2850.56	2107	3428.72	1806	1536.13	1003	1182.23	677	2202.1	989	3881.47	2278	2354.54	1295	4850.55	3157	4616.59	2965	2887.41	2017	4484.58	4440
15	11	ECL	55	2079.55	1730	3654.33	2195	3352.39	2075	1998.37	2421	3327.69	2019	3410.37	2305	2245.68	1530	4735.44	3602	1908.78	1330	2630.49	2213	2794.54	1866	1789.89	1476	2957	2135	3078.67	1886	1505.36	935	1202.75	714	2311.94	1011	3529.45	2246	2374.95	1321	4832.87	3220	4898.16	2818	3117.95	2032	4449.63	4528
1	12	MAL I	56	1892.97	2227	1971	2011	2849.47	2444	1721.84	2537	1605.05	2228	1572.4	2353	1767.8	1641	1830.99	2429	1680.64	1785	2383.39	2417	1706.21	2117	2027.97	2276	2021.62	2277	2656.77	2897	1644.66	1760	804.106	908	2683.71	1429	3614.32	2786	1263.97	1280	2712.81	3444	2833.28	3066	1557.79	1803	5303.9	6703
2	12	MAL I	56	1908.58	2271	2035.26	2139	2944.91	2520	1732.62	2490	1538.2	2153	1746.51	2683	2023.81	1357	2211.77	2515	1657.18	1803	2327.94	2440	1691.39	2098	2006.8	2289	2301.05	2337	2724.31	2866	1602.85	1749	796.601	897	2766.72	1422	3655.83	2835	1257.74	1291	2660.88	3390	2742.93	3094	1568.54	1816	4996.81	6417
3	12	MAL I	56	1892.97	2274	1919.59	2134	3844.7	2574	1591.76	2375	1446.48	2137	1913.62	2752	1469.65	1203	1971.15	2629	1585.73	1763	2335.4	2444	1734.78	2074	2003.63	2224	2103.12	2282	2617.1	2804	1562.11	1707	780.519	893	2800.58	1387	3638.35	2924	1247.35	1289	2686.84	3367	2832.25	3139	1554.86	1805	4953.21	6229
4	12	CY3	68	2146.22	2367	2323.73	2198	2636.09	2625	1806.83	2363	2136.56	2102	3334.76	2887	1344.17	1267	2555.04	2476	1829.74	1792	2681.84	2593	2238.23	2110	2250.4	2198	2168.53	2408	2628.34	2783	1740.22	1688	936.877	885	2800.1	1348	3734.18	3017	1376.27	1254	2903.22	3418	3037.06	3198	1695.38	1858	5967.47	6108
5	12	CY3	68	2197.86	2360	2233.36	2154	2676.79	2465	2023.87	2078	2057.69	2025	3261.68	2615	1277.52	1217	2576.14	2469	2008.61	1630	2530.75	2386	2169.64	2117	2219.43	2122	2091.08	2330	2506.46	2679	1730.68	1662	944.296	866	2668.19	1301	3639.81	2969	1416.31	1234	2860.02	3333	3043.38	3179	1659.25	1812	5661.66	5849
6	12	CY3	68	2174.19	2307	2192.48	2188	2559.23	2422	1584.37	2328	1990.42	1919	3309.24	2865	1251.97	1177	2606.14	2467	1679.76	1638	2348.56	2382	2088.87	2110	2137.55	2055	2124.28	2267	2412.14	2610	1638.48	1629	883.886	874	2701.43	1270	3654.82	2943	1369.94	1176	2763.07	3200	2936.95	3172	1644.6	1789	5595.02	5755
7	12	CY5	69	9249.54	2582	7448.26	2277	9097.23	2391	8148.92	2473	6159.67	1998	7468.57	2851	5249.28	1219	6991.02	2456	6896.55	1636	9908.34	2666	8078.57	2175	8305.81	2094	8652.93	2447	6764.07	2582	7201.94	1738	5298.29	979	6057.27	1282	9206.78	3099	6428.34	1193	9687.77	3243	10595.6	3349	5494.67	1698	15503	5801
8	12	CY5	69	10239	2472	7324.57	2325	8975.06	2532	8459.78	2483	6001.02	1901	7379.96	2822	5428.72	1239	7007.67	2486	7031.29	1538	8781.75	2927	8006.08	2124	7882.01	1955	8884.34	2386	6576.41	2461	6939.59	1701	5535.43	944	5772.74	1213	9461.23	3105	6496.22	1125	9061.33	3009	10720	3233	5192.68	1645	15967.1	5469
9	12	CY5	69	8048.21	2524	7800.84	2200	9148.03	2412	8418.66	2459	6109.88	1941	7186.71	2813	5367.67	1380	7396.16	2657	6965.62	1541	9720.39	2734	7686.84	2104	8335.08	1990	8829.97	2316	6708.05	2362	6897.58	1644	4687.7	935	5887.25	1159	8892.17	3022	5818.88	1186	9182.94	2777	9436.06	2946	5694.31	1722	14209.9	5043
10	12	printing buffer`1	70	1725.91	2098	1934.27	2109	1338.89	2084	1638.6	2381	1531.21	1837	2171.29	2452	1164.18	1355	2383.84	2666	1059.36	1306	2009.58	2355	1541.64	1906	1534.34	1753	1802.02	2041	1783.24	2147	1049.14	1298	576.58	736	848.517	932	2094.97	2483	958.505	1090	2002.54	2460	2121.49	2419	1458.19	1628	3851.29	4305
11	12	printing buffer`1	70	1636.47	1920	1884.8	2161	1445.36	2155	1583.18	2338	1606.94	1845	1994.93	2265	1208.95	1372	2584.36	2956	1074.8	1278	2022.97	2314	1640.19	1949	1495.4	1703	1838.53	2034	1712.9	2044	1049.14	1249	614.226	727	859.655	926	2069.65	2382	1024.37	1145	2280.75	2716	2267.97	2578	1530.61	1709	3793.2	4007
12	12	printing buffer`1	70	1538.47	1847	1916.19	2195	1299.51	2060	1548.18	2282	1700.31	1922	1977.3	2258	1254.7	1441	3013.63	3251	1144.8	1302	1889.13	2255	1699.82	2015	1565.97	1659	1888.41	2076	1688.13	2008	1023.38	1196	593.421	706	883.956	943	2127.37	2396	1060.75	1194	2405.6	2830	2405.6	2728	1600.1	1773	3696.02	3997
13	12	printing buffer`8	71	1579.84	1860	1779.45	2154	1737.98	2162	2058.11	2485	1775.49	2121	2105.86	2516	1327.59	1527	3113.31	3551	1171.32	1451	2026.15	2479	1630.71	2066	1475.3	1699	1792.69	2142	1702.22	2068	950.053	1194	593.657	746	913.29	1002	2158.97	2663	1135.25	1339	2546.2	3220	2570.53	3075	1660.31	1948	4189.8	4537
14	12	printing buffer`8	71	1575.34	1850	1823.51	2158	1685.61	2083	8872.69	2469	1771.33	2146	2115.21	2667	1506.94	1679	3127.93	3640	1165.22	1434	1965.09	2470	1585.84	2050	1446.85	1605	1759.85	2175	1613.37	2024	866.254	1085	568.416	753	989.834	1039	2067.75	2586	1179.85	1364	2676.96	3306	2651.62	3153	1727.86	2011	4387.13	4676
15	12	printing buffer`8	71	1434.17	1723	1732.7	2139	1669.8	2080	2361.44	2452	1761.98	2137	2197.28	2742	1423.12	1598	3100.64	3527	1100.09	1398	1933.55	2369	1580.37	2046	1406.35	1600	1718.27	2231	1553.81	1922	802.648	994	587.599	765	991.931	1083	2014.27	2590	1201.13	1395	2727.64	3349	2857.38	3552	1697.51	2000	4321.71	4587
[truncated: 30 more columns]

## Sheet: SS（PSS） 
				orin1		orin3		orin4		orin5		orin6		orin7		orin8		orin9		orin10		orin11		orin12		orin13		orin14		orin15		orin16		orin17		orin18		orin19		orin20		orin21		orin22		orin23		orin24
				1		2		3		4		5		6		7		8		9		10		11		12		13		14		15		16		17		18		19		20		21		22		23
Column	Row	Name	ID	SS171F635 Median	SS171B635 Median	SS173F635 Median	SS173B635 Median	SS174F635 Median	SS174B635 Median	SS175F635 Median	SS175B635 Median	SS176F635 Median	SS176B635 Median	SS177F635 Median	SS177B635 Median	SS178F635 Median	SS178B635 Median	SS179F635 Median	SS179B635 Median	SS180F635 Median	SS180B635 Median	SS181F635 Median	SS181B635 Median	SS182F635 Median	SS182B635 Median	SS183F635 Median	SS183B635 Median	SS184F635 Median	SS184B635 Median	SS185F635 Median	SS185B635 Median	SS186F635 Median	SS186B635 Median	SS187F635 Median	SS187B635 Median	SS188F635 Median	SS188B635 Median	SS189F635 Median	SS189B635 Median	SS190F635 Median	SS190B635 Median	SS191F635 Median	SS191B635 Median	SS192F635 Median	SS192B635 Median	SS193F635 Median	SS193B635 Median	SS194F635 Median	SS194B635 Median
13	2	SSA	10	3399.81	2291	4369.83	2086	3304.79	924	3270.47	2758	4805.29	4220	6306.45	3161	5962.44	2589	8403.5	3693	7913.33	4762	4694.11	3967	4940.83	2578	2402.3	945	2972.57	1661	12237.2	4410	5181.57	2266	4033.72	2281	2089.34	763	1800.59	420	9400.2	905	7849.66	1476	3051.13	1979	2866.79	2303	1555.94	891
14	2	SSA	10	3437.55	2357	4105.62	2117	3549.15	871	3014.39	2928	5142.54	4323	6562.1	3227	6080.25	2643	9190.48	3791	7744.52	4824	4884.56	4048	4832.62	2626	2309.63	962	2965.45	1665	12611.5	4513	5834.76	2433	4084.33	2328	2000.13	738	1880.21	436	9294.73	897	9097.12	1536	3130.58	2057	2850.9	2251	1697.58	893
15	2	SSA	10	3262.04	2251	4196.21	2068	3299.76	883	3187.62	2952	5088.15	4201	6600.98	3275	5812.82	2548	8842.93	3833	7850.57	4797	4989.52	3856	5105.3	2646	2325.07	936	2919.11	1617	11981.8	4455	5872	2513	4229.48	2246	2001.09	715	1859.11	453	9548.1	906	9637.81	1645	3281.02	2050	2746.01	2112	1614.26	913
1	1	LTL	1	2231.82	2507	2152.62	2032	2092.55	523	6464.14	3305	14285.1	3152	3144.33	3143	6016.94	2702	4183.13	3631	8128.24	4151	7689.2	3676	1637.9	1960	585.892	687	1787.15	1855	8318.93	4243	1982.77	2224	4211.03	2547	2055.91	736	973.853	686	841.897	821	2237.17	2710	1405.23	1494	2744.61	2513	961.66	793
2	1	LTL	1	2103.56	2399	2242.46	1997	2099.07	565	5983.9	3303	11539.8	3355	3233.39	3219	5291.48	2606	3364.05	3537	3510.64	3848	7237.39	3617	1570.68	2111	600.631	661	1436.36	1698	8354.3	4203	2004.61	1977	4392.51	2548	2057.15	724	1036.04	670	705.373	842	2178.92	2379	1379.08	1415	2672.94	2520	960.414	811
3	1	LTL	1	1985.94	2305	1985.35	2081	1932.15	546	6482.79	3079	17663.5	3549	3079.33	3147	4243.58	2496	3481.06	3515	4480.61	3697	7567.52	3509	1620.88	1846	750.974	779	1047.24	1554	7601.12	3872	1959.42	2164	4466.31	2493	1960.14	715	999.971	644	704.463	850	2228.07	2317	1335.5	1391	2573.19	2429	910.587	780
4	1	PSA	2	6344.35	2284	17580.2	2082	5993.52	611	10243.7	3034	6377.63	3706	8060.86	3231	8009.14	2565	6926.2	3556	7425.54	4224	5536.2	3511	5646.96	2137	5053.04	905	4655.56	1835	9373.52	4270	7446.05	2247	6511.25	2466	9299.3	729	3156.91	624	2860.76	886	6307.75	2652	4388.26	1445	6252.83	2432	3149.64	809
5	1	PSA	2	6209.97	2237	16624.6	1999	5030.28	680	11085.6	2923	6401.42	3653	6121.59	3006	7316.19	2502	6625.71	3381	6619.09	4031	5622.24	3331	5439.17	2066	5005.03	893	4696.84	1770	8781.13	4023	8049.01	2197	6422.97	2392	9087.1	718	3080.6	568	3215.35	953	6114.42	2497	4315.86	1419	6398.57	2404	3092.66	793
6	1	PSA	2	6300.7	2155	17510.1	1906	3207.25	699	9976.13	2856	6510.82	3527	5218.46	2828	6375.29	2424	6497.63	3207	6849.76	3827	4718.77	3100	5160.89	1993	4783.25	892	4504.82	1685	9346.63	3718	7001.51	2056	6383.56	2313	8753.64	705	2819.27	538	3430.06	1014	6351.41	2263	4636.5	1429	6324.29	2325	3045.32	766
7	1	LCA	3	7821.89	2023	9061.14	1810	5404.95	699	8512.46	2638	7238.27	3363	7046.03	2562	6702.82	2243	6410.85	2879	6993.97	3580	7205.1	2768	6437.68	1897	6518.1	861	6219.3	1585	7177.9	3268	8415.45	2010	7449.36	2149	11383.8	688	3825.2	510	5250.96	1022	8318.9	1926	5576.4	1426	10277.8	2266	4613.53	754
8	1	LCA	3	8041.76	1971	9147.75	1761	5999.41	730	8542.91	2568	7321.1	3340	7067	2497	7039.82	2061	6151.5	2668	7512.62	3634	7163.79	2864	6735.1	1994	6771.44	859	6371.48	1598	6809.49	3085	7959.66	1940	7678.77	2083	11451.6	677	3438.16	494	5110.54	1041	7744.1	1760	5703.43	1397	10910.6	2176	4185.67	736
9	1	LCA	3	8161.69	2012	9277.67	1785	6357.54	759	8196.96	2512	7412.47	3433	7449.04	2805	6464.43	2001	6231.48	2960	7469.48	4024	7516.29	3159	6906.76	2184	6757.52	868	6220.22	1601	7038.7	3311	8488.89	1971	7353.2	2081	10567.3	682	3631.68	481	5163.07	883	7489.53	1690	6124.9	1395	9985.76	2203	4519.61	742
10	4	MNA-M	19	10058.8	2109	31924.7	1840	6150.27	743	10758.6	2634	7518.16	3527	12337.7	2929	7670.65	2197	11844.1	3180	11393.3	4291	9402.57	3420	9629.66	2363	5895.59	889	14215.6	1643	10840.7	4025	8114.58	2065	10181.1	2238	11114.6	670	2998.4	446	4376.3	911	6587.39	1672	5445.75	1322	6910.68	2057	3678.41	741
11	4	MNA-M	19	9589.38	2152	34506.2	1937	5921.31	763	11151.1	2626	7122.16	3678	12109.2	2985	7836.9	2379	11623.8	3272	11996.4	4472	9800.9	3604	11894	2458	5761.6	895	13456.6	1631	11448.9	4214	8539.42	2142	6586.3	2238	10519.7	699	3188.56	427	4336.47	866	6548.43	1494	5256.47	1472	6603	1997	3832.67	776
12	4	MNA-M	19	10081.8	2219	32722.1	2021	5971.54	765	11151.1	2686	8080.04	3814	12486.6	3002	8320.33	2491	12313.2	3411	11438.9	4574	9807.41	3766	11073.1	2521	5044.54	919	12761.6	1626	11050	4411	8544.99	2173	7957.48	2258	12191.9	723	2875.98	409	4279.33	865	6350.17	1360	5425.01	1603	7853.6	1991	3497.52	795
10	1	UEA I	4	5413.04	2149	2637.41	1812	873.494	656	2481.8	2180	4645.87	3486	2618.54	2994	4266.49	2254	4017.63	3349	5103.34	3752	3520.46	3369	2219.51	2353	1044.99	715	1317.64	1613	5308.08	3720	1423.6	2047	2367.9	2173	1503.28	676	592.292	468	1132.26	846	1607.99	1600	1960.13	1481	1994.09	2122	607.854	779
11	1	UEA I	4	5731.82	2219	2671.03	1897	942.836	678	2203.4	2456	4921.17	3594	3365.15	2589	4677.67	2405	4722.03	3536	5201.76	4085	3588.13	3526	2345.61	2072	907.148	789	1877.14	1318	4944.21	3860	1594.6	1797	2501.84	2188	1257.34	675	564.625	473	1129.23	847	1551.43	1440	2062.01	1664	1961.19	2127	633.663	821
12	1	UEA I	4	5964.68	2291	2944.98	1949	677.89	777	2193.05	2631	5487.28	4050	2932.34	3081	4393.09	2471	4456.93	3658	5979.87	4022	3922.33	3717	2096.49	2453	1037.9	697	1931.87	1295	5107.39	4058	1495.2	1947	2559.96	2221	1676.45	716	540.031	437	1077.72	859	1531.23	1393	2332.63	1957	1995.15	2234	635.443	846
13	1	AAL	5	8218.18	2381	9814.15	2135	2121.37	904	5302.34	2724	4427.93	4150	17977.9	3181	38761.2	2516	7714.57	3750	5289.44	4702	5087.61	3916	3993.56	2574	2380.76	942	1393.53	1605	27144.9	4072	6330.86	2271	7712.44	2247	4421.77	766	2374.23	423	3694.14	881	4799.81	1453	5466.96	1987	4130.31	2331	2934.73	895
14	1	AAL	5	7975.7	2430	15557.4	2143	10553.2	826	5341.78	2877	4778.57	4270	24045.5	3196	29413.8	2550	10039.6	3827	5729.06	4826	5335.4	3913	4313.28	2603	2422.39	944	5013.08	1579	19945.6	4147	6994.89	2408	7861.2	2260	4505.74	729	2419.09	443	3825.92	901	4949.8	1555	5547.96	2059	4056.06	2313	2970.6	905
15	1	AAL	5	11232.5	2313	52608.7	2105	10640.8	847	7362.35	2951	8448.24	4076	20832.7	3232	30640.5	2479	20514.9	3916	5030.66	4845	7934.16	3790	5608.16	2611	6355.03	926	4565.16	1548	19254.2	4181	8205.05	2518	8119.09	2231	3928.29	714	2427.14	468	3938.41	931	5051.58	1645	5451.2	2084	4079.68	2223	3080.63	916
1	2	LAL	6	5165.23	2488	3612.84	2046	3157.21	522	4331.28	3325	5439.1	3257	3978.29	3160	4871.66	2814	7290.54	3858	4593.94	4499	4641.88	3736	3192.48	2236	1297.84	787	4711.15	2043	7358.56	4431	2966.81	2213	3557.19	2587	2962.96	727	1445.03	679	2224.34	863	5043.92	2791	2693.01	1440	2117.73	2453	812.227	799
2	2	LAL	6	5227.73	2425	3705.58	2046	3153.72	552	4431.25	3296	5991.26	3376	4132.84	3378	4657.29	2732	7365.32	3867	4635.89	4366	4770.74	3695	3130.55	2236	1332.71	833	4584.06	1928	7397.93	4343	2879.41	2221	3612.98	2610	2899.92	703	1430.26	656	2164.28	861	4782.23	2725	2679.49	1367	2142.82	2431	808.692	783
3	2	LAL	6	5641.03	2333	3638.04	2092	2994.47	559	4308.03	3118	5775.04	3626	3937.41	3415	4486.79	2669	7187.84	3759	4554.98	4462	4666.86	3636	3027.66	2224	1428.3	868	4200.56	1851	6869.34	4322	2868.25	2222	3609.26	2498	2928.48	718	1481.48	643	2111.73	865	4499.09	2689	2982.58	1378	2034.72	2307	794.551	777
4	2	TL	7	2147.63	2226	2177.21	2105	514.009	488	2607.07	3199	2599.45	3757	2604.45	3377	2107.46	2719	2919.85	3640	3271.88	4512	3207.59	3758	1819.47	2313	946.33	945	1241.38	1923	3384.69	4363	2298.15	2447	2593.64	2575	930.153	763	622.487	564	898.498	985	2277.47	2768	1172.78	1356	1463.64	2456	707.898	875
5	2	TL	7	2110.65	2151	2105.37	2044	627.266	691	2489.46	3130	2612.52	3812	2655.11	3197	2066.36	2621	2895	3437	3036.18	4301	3023.13	3556	1844.62	2205	876.268	954	1225.59	1882	3289.95	4160	2009.74	2370	2431.73	2497	870.868	746	506.984	570	925.695	1037	2182.79	2598	1192.28	1357	1429.72	2425	725.554	874
6	2	TL	7	1994.45	2140	1928.96	1960	668.648	635	2500.35	3043	2524.31	3753	2392.27	3012	2115.1	2536	2675.18	3214	2904.82	4071	2738.99	3328	1795.25	2147	805.22	900	1219.67	1832	3157.72	3838	1998.61	2314	2259.69	2440	885.178	748	448.722	531	1023.4	1104	2056.88	2346	1244.01	1336	1395.8	2344	696.969	849
7	2	MAA	8	3382.16	2049	1705.5	1804	627.777	689	2084.3	2793	5364.46	3585	2071.58	2674	3687.12	2324	3244.98	3010	3271.48	3707	3024.14	2581	1616.84	1931	731.777	871	1070.25	1671	4385.39	3365	1488.22	2080	2063.25	2230	1259.74	694	529.519	503	1129.47	1076	1717.72	1925	1363.68	1406	1601.23	2170	525.725	734
8	2	MAA	8	3342.15	1979	1792.03	1692	597.931	712	2034.56	2705	5465.94	3525	1980.17	2586	3795.42	2140	2945.92	2638	3350.32	3738	2696.89	2907	1671.92	2008	743.376	861	1063.92	1676	4175.56	3328	1447.91	1995	2020.99	2163	1422.01	695	592.506	453	778.251	945	1739.79	1638	1446.18	1362	1552.53	2176	518.633	732
9	2	MAA	8	3344.01	1999	1647.81	1772	605.89	757	2146.98	2175	5358.49	3656	2277.25	2882	3521.19	2061	3438.73	3016	3797.46	4164	2975.54	3221	1923.57	2280	766.573	883	1086.07	1661	4375.9	3622	1448.9	1993	2084.88	2159	1904.56	696	567.952	477	909.719	815	1700.44	1685	1683.73	1380	1676.77	2160	615.267	723
10	2	SNA	EBL	16127.8	2115	7319.36	1861	1827.13	736	9905.97	2621	23663.5	3581	7124.7	2983	13850.9	2229	11369	3343	5895.43	4334	5257.46	3441	4942.36	2361	4249.01	882	2748.61	1621	12338.6	3823	3823.47	2002	6905.23	2162	6973.34	673	1532.96	457	2734.98	847	4544.28	1649	4423.67	1406	4399.87	2073	2215.55	734
11	2	SNA	EBL	13327	2171	7543.04	1941	2039.92	753	4859.67	2661	31476.1	3517	7138.07	3039	13455.1	2352	11905.3	3477	6101.61	4532	5576.45	3644	4893.74	2437	3841.43	885	2774.94	1595	12405.7	3963	3929.87	2058	7121.11	2179	6516.68	677	1594.27	436	2629.41	876	3848.1	1513	4753.38	1579	4622.91	2066	2227.97	790
12	2	SNA	EBL	15437.6	2233	7765.13	2023	2112.43	765	12241.9	2545	32648.2	3767	7426.91	3089	14282.8	2469	9424.71	3575	6118.14	4578	5828.33	3812	3913.43	2468	3526.41	892	3760.77	1579	12210.4	4127	3949.92	2155	6993.12	2235	6039.04	726	1559.58	426	2260.66	871	3517.61	1397	4333.76	1765	4105.43	2115	2223.83	818
13	2	SSA	10	3399.81	2291	4369.83	2086	3304.79	924	3270.47	2758	4805.29	4220	6306.45	3161	5962.44	2589	8403.5	3693	7913.33	4762	4694.11	3967	4940.83	2578	2402.3	945	2972.57	1661	12237.2	4410	5181.57	2266	4033.72	2281	2089.34	763	1800.59	420	9400.2	905	7849.66	1476	3051.13	1979	2866.79	2303	1555.94	891
14	2	SSA	10	3437.55	2357	4105.62	2117	3549.15	871	3014.39	2928	5142.54	4323	6562.1	3227	6080.25	2643	9190.48	3791	7744.52	4824	4884.56	4048	4832.62	2626	2309.63	962	2965.45	1665	12611.5	4513	5834.76	2433	4084.33	2328	2000.13	738	1880.21	436	9294.73	897	9097.12	1536	3130.58	2057	2850.9	2251	1697.58	893
15	2	SSA	10	3262.04	2251	4196.21	2068	3299.76	883	3187.62	2952	5088.15	4201	6600.98	3275	5812.82	2548	8842.93	3833	7850.57	4797	4989.52	3856	5105.3	2646	2325.07	936	2919.11	1617	11981.8	4455	5872	2513	4229.48	2246	2001.09	715	1859.11	453	9548.1	906	9637.81	1645	3281.02	2050	2746.01	2112	1614.26	913
1	3	MAL II	11	3413.37	2470	1906.14	1997	524.723	506	4014.19	2756	2855.02	3205	2560.32	3118	2730.31	2827	3986.71	3839	3237.73	4458	3018.05	3599	1617.3	2235	745.284	784	1219.95	2077	3625.47	4318	1412.57	2237	2079.7	2568	713.869	713	557.488	659	623.583	841	1883.24	2749	1328.88	1376	1559.99	2249	526.648	789
2	3	MAL II	11	3126.59	2413	1926.63	2013	588.82	538	2451.97	3342	3016.89	3349	2572.99	3301	2691.24	2787	3800.89	3786	3136.26	4462	2982.48	3577	1611.02	2227	736.692	828	1258.61	1956	3684.54	4273	1446.27	2256	2055.91	2547	734.178	715	537.179	633	622.622	821	1889.97	2674	1258.15	1326	1577.92	2262	532.332	772
3	3	MAL II	11	2974.57	2320	1967.6	2048	521.464	552	2287.92	3202	3057.08	3546	2492.75	3308	2729.25	2693	3807.22	3746	3170.78	4404	2960.51	3537	1608.93	2177	720.584	855	1203.84	1883	3592.18	4141	1406.62	2250	2076.72	2534	748.395	734	558.503	612	640.878	840	1802.53	2565	1320.91	1357	1568.96	2223	549.381	768
4	3	SNA-I	12	12890.5	2272	10087.5	2081	4269.86	607	16473.1	3234	43881	3862	11365.5	3132	11092.6	2624	11448.9	3625	12898.3	4328	8916.89	3512	9855.9	2190	2543.12	871	3166.71	1767	14366.4	4265	5759.92	2300	9439.59	2547	9989.19	726	4305.94	597	2817.95	910	7401.9	2573	4970.91	1384	5309.57	2321	2451.66	772
5	3	SNA-I	12	13136.6	2187	11031.2	1969	10575.6	689	21480.2	3402	34645.5	3707	14775.5	3098	11352.4	2549	12996.6	3482	9648.21	4087	8412.13	3311	11882.5	2159	2578.51	874	3324.52	1760	14309	3990	5816.39	2192	11024.1	2489	9938.87	725	2952.73	559	2976.23	929	6962.62	2395	4340.94	1386	5347.99	2271	2472.25	757
6	3	SNA-I	12	13014.2	2103	10683.6	1878	5754.29	700	22117.8	3037	34375.9	3719	12336.5	2944	10343.2	2454	13570.9	3292	9283.18	3846	8203.18	3054	11008.9	2024	2290.63	860	2986.9	1647	12277.6	3626	6213.34	2233	9238.62	2398	10427.3	699	2839.53	519	3262.56	1009	6469.99	2102	4803.81	1389	5027.2	2225	2485.11	747
7	3	NPL	NPA	2590.29	1941	2413.36	1736	645.687	652	2283.34	2244	2666.93	3252	2332.76	2228	2334.67	2099	3076.26	2766	3733.06	3297	2857.39	2537	2217.32	1694	1029.8	786	1553.05	1266	3320.2	2659	1923.09	1821	1913.34	2223	876.358	674	822.191	480	1246.13	932	2326.85	1849	1484.26	1301	2154.9	2031	3342.61	707
8	3	NPL	NPA	2469.51	1889	2408.07	1708	633.537	666	2152.29	2137	2574.07	3220	2083.33	2440	4301.41	1910	2839.25	2441	3859.2	3159	3008.55	2565	2306.97	1805	1037.11	787	1733.73	1347	3482.09	2955	1853.05	1892	1938.16	1928	857.98	656	791.237	461	1095.75	890	2255.67	1745	1520.94	1301	2127.63	1990	3259.28	694
9	3	NPL	NPA	2503.42	1935	2394.3	1716	688.212	651	2093.28	2184	2769.34	3434	2471.33	2443	2056.57	1799	2948.2	2890	4132.32	3791	3348.39	2822	2455	2123	1029.8	814	1612.58	1203	3725.44	3387	1947.92	1665	1951.46	2105	891.835	657	802.845	467	1091.74	816	2138.37	1694	1485.2	1285	2079.66	1967	3336.13	698
10	3	ConA	14	18613.8	2071	29003.9	1842	8736.74	755	26678.3	2580	12671.3	3527	12090.6	2925	18050	2183	24508.3	3234	12047.5	4243	9100.88	3381	13696.7	2299	13096.2	862	11714.4	1617	25851	3954	10639.8	2105	16675.3	2219	19528.2	661	2608.77	453	6367.47	877	6172.79	1672	12114.7	1364	14793	1959	6860.21	727
11	3	ConA	14	18321.7	2147	33003.4	1910	7844.91	762	25763.6	2581	12253	3670	12588.1	2983	19180.5	2354	27809.9	3399	12287	4401	9590.09	3557	10148.5	2400	11683.7	898	11374.1	1611	23480.1	4114	13274.6	2117	17912.4	2222	18129	684	2543.1	428	5991.36	880	5700.66	1487	13347.1	1484	14636.4	1931	6211.13	768
12	3	ConA	14	18812.4	2208	32977.1	1984	8490.58	765	24769.6	2693	10024.1	3897	12687.3	3039	19676.7	2445	25422.9	3467	12518.5	4455	9667.28	3798	10676.3	2421	12989.2	901	12094.6	1541	22883.7	4351	14161.8	2181	16951.5	2254	20241	717	2860.86	414	6070.15	882	5219.26	1375	12288.3	1633	14719.6	2020	5621.72	779
13	3	GNL	15	3367.81	2220	3791.99	2003	1134.26	811	3454.47	2568	3589.22	3862	3247.15	2761	3733.17	2467	4744.99	3558	4175.54	4491	3638.49	3744	2860.54	2414	1512.33	869	1852.06	1373	5107.96	4302	2973.13	2150	3067.8	2145	1475	716	1177.36	394	1390.29	860	2146.89	1367	2010.69	1771	2746.25	1978	3900.85	768
14	3	GNL	15	3383.8	2285	4037.11	2011	1106.58	817	3872.55	2488	7340.87	3795	3245.16	2827	3981.65	2301	4754.93	3650	4204.03	4583	3652.3	3732	2941.7	2545	1566.03	858	1832.33	1336	5117.82	4380	3037.23	2200	2921.86	2250	1435.39	690	1159.08	391	1371.17	835	2323.52	1426	2064.22	1842	2687.54	1870	3929.85	763
15	3	GNL	15	3230.33	2186	5404.49	1960	1050.28	800	3383.41	2875	4352.47	3789	2944	2869	3576.13	2377	5260.83	3667	4280.01	4617	3633.31	3649	2991.78	2504	1639.46	849	1850.96	1348	5521.11	4332	3130.91	2330	3009.62	2210	1400.85	668	1219.01	418	1342.94	860	2456.44	1552	2083.21	1887	2458.76	1864	3839.94	786
1	4	HHL	AL	2988.68	2443	2794.01	1924	790.63	500	3000.63	3175	3409	2860	2410.89	2929	2393.6	2578	3768.04	3667	3560.56	3810	3125.77	3207	2282.43	2125	834.162	703	1733.51	1774	4000.77	3689	1970.1	2080	2297.86	2311	944.373	668	1135.35	638	1028.85	827	2997.24	2453	1355.56	1251	2212.92	2150	2704.08	759
2	4	HHL	AL	2838.07	2383	2773.52	1956	790.63	513	3616.84	2745	3301.43	3145	2514.62	3109	2367.67	2507	3962.54	3672	3617.43	3757	3219.38	3357	2271.94	2152	838.886	663	1578.58	1537	3924.25	4075	1962.98	2064	2370	2343	956.965	665	1096.52	623	1016.94	828	2809.73	2595	1431.31	1311	2184.4	2154	2780.04	752
3	4	HHL	AL	2765.32	2306	2717.17	1970	766.608	520	3299.34	2666	3249.21	3323	2569.08	3149	2194.78	2554	3638.38	3567	3697.03	3542	2964.8	3134	2232.57	2101	868.171	727	1542.68	1614	3783.49	4012	1982.57	2066	2233.73	2489	930.732	684	1193.06	591	1045.71	819	2657.93	2521	1417.95	1308	2144.3	2143	2765.74	751
4	4	CALSEPA	17	5247.91	2253	5656.41	2025	2283.54	565	3970.76	3013	3185.82	3565	5579.69	3152	4390.77	2582	7228.53	3592	7234.5	4281	6874.24	3339	5096.97	2122	3788.75	862	3233.1	1785	6581.44	4077	3357.42	2447	4674.13	2604	3931.99	691	2202.23	562	1966.2	873	3680.96	2470	2967.73	1306	3811.13	2139	2242.68	760
5	4	CALSEPA	17	5547.85	2161	5880.25	1944	1959.76	651	2495.19	2954	3066.26	3537	5624.41	2996	4353.25	2521	6411.7	3365	6983.65	4172	6276.48	3186	5195.71	2034	3778.46	854	3242.36	1713	6155.44	3870	3759.45	2333	4788.88	2604	4017.89	688	2073.37	528	1987.95	884	3822.77	2274	3078.6	1333	3784.41	2133	2238.99	738
6	4	CALSEPA	17	5513.15	2072	5597.09	1857	2337.01	689	2824.16	2856	3184.33	3494	5208.41	2814	4350.05	2435	5189.24	3189	7193.13	3899	6062.99	2909	4527.23	1729	3502.69	851	3297.92	1651	6440.47	3595	3372.28	2318	4728.62	2482	3922.88	677	1940.61	494	2154.12	989	3335.57	1970	3287.47	1311	3718.08	2106	2113.42	730
7	4	AMA	18	1939.16	1995	1705.66	1786	432.164	609	1445.69	2614	1578.72	3314	1875.36	2550	2075.3	2223	3289.31	2992	2615.77	3607	2015.19	2700	1414.61	1845	699.224	740	1062.86	1610	2708.41	3228	1117.28	1584	1359.19	2010	754.292	679	448.691	467	837.805	955	1606.61	1850	1276.34	1304	1429.5	2016	520.532	700
8	4	AMA	18	2395.56	1787	1738.56	1735	538	581	1536.83	2138	1558.88	3307	1865.1	2456	1871.25	2105	3100.64	2759	2555.09	3562	2157.49	2811	1460.65	1953	885.899	704	1083.37	1651	2855.16	3362	963.273	1684	1395.51	2020	819.705	676	422.117	457	777.571	912	1604.42	1791	1272.17	1309	1386.79	1989	495.891	689
9	4	AMA	18	1966.76	1881	1643.04	1700	489.491	635	1629.43	2048	1611.06	3433	2157.33	2717	1673.36	1915	3158.06	2895	2876.3	3957	2469.29	3122	1634.34	2166	795.259	716	1103.87	1618	3162.69	3427	987.246	1831	1431.83	1905	737.939	666	431.316	455	938.561	906	1535.43	1734	1344.07	1275	1341.98	1985	507.185	695
10	4	MNA-M	19	10058.8	2109	31924.7	1840	6150.27	743	10758.6	2634	7518.16	3527	12337.7	2929	7670.65	2197	11844.1	3180	11393.3	4291	9402.57	3420	9629.66	2363	5895.59	889	14215.6	1643	10840.7	4025	8114.58	2065	10181.1	2238	11114.6	670	2998.4	446	4376.3	911	6587.39	1672	5445.75	1322	6910.68	2057	3678.41	741
11	4	MNA-M	19	9589.38	2152	34506.2	1937	5921.31	763	11151.1	2626	7122.16	3678	12109.2	2985	7836.9	2379	11623.8	3272	11996.4	4472	9800.9	3604	11894	2458	5761.6	895	13456.6	1631	11448.9	4214	8539.42	2142	6586.3	2238	10519.7	699	3188.56	427	4336.47	866	6548.43	1494	5256.47	1472	6603	1997	3832.67	776
12	4	MNA-M	19	10081.8	2219	32722.1	2021	5971.54	765	11151.1	2686	8080.04	3814	12486.6	3002	8320.33	2491	12313.2	3411	11438.9	4574	9807.41	3766	11073.1	2521	5044.54	919	12761.6	1626	11050	4411	8544.99	2173	7957.48	2258	12191.9	723	2875.98	409	4279.33	865	6350.17	1360	5425.01	1603	7853.6	1991	3497.52	795
13	4	VFA	20	3444.39	2242	2946.14	1997	1031.29	872	2948.47	2858	3228.68	4183	2973.62	3044	3620.46	2557	4183.48	3535	3619.92	4547	3359.62	3553	2416.07	2520	1308.58	908	1427.45	1609	4830.92	4514	2286.09	2258	3156.9	2319	1609.08	735	696.868	393	1086.1	854	2076.85	1351	1893.14	1739	1928.8	1958	672.269	772
14	4	VFA	20	3402.09	2288	2688.25	2019	1035.14	867	2641.29	2852	3202.68	4110	2865.21	3032	3514.78	2557	4282.78	3646	3817.92	4770	3417.26	3793	2496.94	2561	1281.3	900	1426.48	1569	5070.62	4606	2288.84	2383	3087.24	2333	1579.17	694	665.963	386	1049.83	850	1838.49	1405	1890.25	1800	1832.41	1847	701.174	762
15	4	VFA	20	3218.48	2172	2924.48	1984	1123.73	870	2790.55	2917	3173.79	4148	2877.05	3048	2959.05	2498	4231.76	3636	4007.56	4663	3521.38	3694	2431.87	2522	1317.35	907	1465.45	1552	4245.33	4522	2451.09	2435	3090.9	2304	1441.59	681	709.829	407	1067.44	870	2077.89	1498	1920.13	1840	1812.17	1783	727.281	820
1	5	VVA mannose	21	4628.13	2429	4650.38	1907	2346.38	496	4136.69	3186	3780.4	3028	4061.92	2853	4324.68	2755	4886.46	3640	4220.1	4434	3839.69	3356	2789	2213	2102.48	782	2620.7	2027	4657.45	4157	4005.71	2336	4170.29	2591	2253.62	707	1254.51	631	1440.18	880	3454.89	2686	1775.95	1268	2462.33	2124	1097.44	756
2	5	VVA mannose	21	4400.43	2349	4122.96	1916	2133.27	508	3980.19	3229	3762.64	3209	3922.7	3098	4179.57	2723	4853.13	3689	4138.24	4530	3150.15	3501	2688.85	2245	2118.91	862	2370.9	1918	4697.99	4216	4021.54	2361	4069.01	2614	2143.24	714	1216.15	624	1315.83	888	3469.35	2644	1816.53	1286	2553.2	2120	1155.89	772
3	5	VVA mannose	21	4348.54	2284	3993.75	1942	2017.84	523	3599.48	3092	3654.98	3138	4144.28	3150	4368.8	2650	4898.23	3642	4158.47	4443	3196.38	3360	2567.5	2178	2141.92	877	2461.84	1857	4708.94	4132	4292.66	2355	4034.2	2598	1831.71	708	1168.44	601	1283.05	864	3490.55	2568	1996.51	1282	2529.38	2092	1112.27	760
4	5	ASA	22	3602.12	2196	4738.79	1959	5217.77	558	2078.24	2888	2752.76	3400	2271.1	3060	3160.33	2571	3951.42	3483	3120	4245	8863.17	3342	8699.16	2026	1925.31	854	10018.1	1759	3148.13	3925	3279.25	2265	2577.39	2465	937.522	692	572.33	561	768.613	850	11225.9	2389	6393.98	1264	2799.32	1998	562.596	711
5	5	ASA	22	3606.12	2133	4747.79	1895	4960.96	624	2071.02	2813	2690.88	3335	2226.59	2962	2941.81	2483	3879.59	3346	3004.23	4035	8545.76	3162	8035.41	1797	1920.28	859	9880.17	1709	3002.19	3705	3149.06	2233	2625.35	2353	940.467	677	556.623	521	804.722	860	10840	2141	6266.31	1257	2700.96	1959	571.236	691
6	5	ASA	22	3502.06	2063	4820.84	1816	4737.15	662	2018.42	2774	2618.68	3386	2072.83	2805	2801.2	2397	3574.08	3161	2880.75	3793	8497.52	2870	7195.11	1692	1868.95	842	10067.4	1627	2763.67	3369	3195.06	2202	2475.59	2262	978.754	680	649.885	522	933.684	962	10224.1	1923	6252.12	1259	2663.13	1986	552.035	690
7	5	GSL II	BSL II	4304.91	1950	3443.13	1568	1121.85	563	3227.19	2252	9667.5	2844	7184.25	2235	14218.9	2158	5495.98	2576	1686.63	2872	1115.08	2434	1409.58	1477	566.3	816	1152.75	1148	2785.9	3201	1124.66	2055	1714.3	2173	902.227	566	422.126	471	1293.1	961	1994.92	1559	1249.92	1227	2371.02	1541	457.809	678
8	5	GSL II	BSL II	4220.86	1853	3158.98	1552	1117.63	569	3046.16	2153	10419.8	2871	7287.99	2011	17086.2	1899	4660.6	2397	1104.51	3493	1163.78	2530	1551.55	1658	575.844	812	1401.96	1321	4025.61	2840	1192.56	1424	1706.18	2052	999.153	637	405.821	449	972.894	720	1944.91	1347	1260.83	1226	2300.07	1496	454.811	671
9	5	GSL II	BSL II	4011.42	1886	2580.01	1561	1288.81	574	3175.6	2102	10752.8	3042	7473.93	2205	13694.8	1846	5311.38	2549	1280.94	3906	1347.1	2829	1549.26	1875	607.659	826	1781.62	1246	4034.09	3133	1442.73	1373	1743.82	1980	883.204	587	405.821	448	919.38	702	1197.48	1695	1246.64	1238	2461.63	1648	466.806	679
10	5	LEL	TL	4172.85	2035	16677.1	1747	4872.28	719	5298.11	2477	3790.54	3491	7114.17	2742	11188.8	2117	4152.25	2815	5695.13	4082	4648.2	3222	3223.52	2179	2610.72	824	2513.22	1571	17155.2	3836	3001.04	1955	5810.69	2170	1659.18	647	1300.31	437	989.136	807	4768.95	1626	2542.86	1252	3416.59	1852	1001.57	720
11	5	LEL	TL	4512.38	2115	17331.9	1823	4896.43	720	5690.9	2537	3871.89	3569	7125.75	2829	10146.7	2249	4247.19	2941	6039.31	4169	4722.56	3467	3186.35	2279	2744.77	833	2590.41	1525	18057	3969	3140.13	1997	5713.89	2171	1675.49	673	1270.02	421	912.494	818	4886.17	1388	2654.45	1383	3281.26	1809	1013.57	712
12	5	LEL	TL	3171.36	2213	17581.6	1938	5028.63	734	5818.01	2549	3992.65	3717	7513.64	2888	9985.77	2351	4573.72	3103	6204.8	4363	4850.87	3513	3373.42	2321	2683.84	836	2586.34	1507	18085.4	4352	3195.77	2065	5762.85	2155	1745.4	683	1252.54	401	969.299	792	4724.77	1286	2781.87	1550	3284.42	1776	1092.77	735
13	5	STL	PL	3753.5	2179	25161.8	1925	7526.76	814	6113.06	2822	4698.15	3606	10434.5	2937	10216.5	2422	5366.26	3406	5065.16	4517	5556.46	3826	2645.27	2461	2337	865	1840.48	1469	11900.5	4417	2501.16	2091	4808.45	2206	1483.62	744	1324.56	376	1323.89	805	9686.25	1320	4090.01	1589	4383.96	1741	1149.71	751
14	5	STL	PL	3727.95	2243	26514.1	1969	6318.49	834	6351.31	2770	4191.26	3977	10313.4	2940	10932.6	2436	5606.35	3455	5144.24	4544	5463.54	3880	5743.29	2470	2341.51	882	1788.58	1390	12043.8	4481	2411.22	2183	4838.43	2211	1384.09	665	1318.05	379	1519.73	793	8300	1335	4117.35	1739	4611.51	1672	1156.47	746
15	5	STL	PL	3818.46	2120	27952.7	1926	5573.35	849	7179.11	2778	4231.37	4034	10096.5	2871	10312.4	2416	5979.13	3488	5321.19	4500	5395.33	3610	3085.16	2446	2536.73	881	1759.24	1345	12119.4	4469	2496.16	2256	5004.31	2255	1335.73	629	1388.75	386	1594.13	817	9268.3	1404	4039.22	1752	4514.83	1635	1169.02	784
1	6	UDA	26	2154.78	2382	1685.66	1832	504.898	491	2084.22	3107	2274.06	2908	2429.23	2761	2265.38	2691	3816.15	3528	3311.2	4339	2652.65	3405	1681.14	2183	644.869	729	1184	1918	3193.99	3913	1503.6	2293	2196.49	2553	687.046	699	531.508	636	680.832	871	1987.85	2530	1260.48	1245	1302.46	1957	436.257	646
2	6	UDA	26	2068.21	2319	1668.9	1844	537.211	490	2127.64	3170	2297.28	3078	2656.51	3000	2273.83	2687	3985.29	3494	3334.02	4488	2508.12	3359	1633.32	2198	653.244	772	1136.9	1813	3135.36	3980	1567.38	2329	2253.78	2571	696.317	691	538.719	624	680.832	873	1999.88	2523	1246.14	1235	1314.75	1962	446.061	633
3	6	UDA	26	2036.57	2258	1667.04	1846	555.387	503	1930.73	3065	2334.65	3125	2652.28	3066	2230.49	2621	3804.52	3577	3222.09	4358	2430.96	3312	1589.85	2147	663.713	784	1127.47	1778	3137.46	3900	1513.33	2339	2220.27	2551	687.046	627	527.388	611	684.111	871	1916.82	2469	1200.06	1228	1342.39	1953	449.982	635
4	6	PWM	PWA	2034.83	2176	1649.49	1891	527.923	536	1892.23	2894	2377.67	3343	2283.64	3062	2124.93	2592	3502.79	3313	2916.89	4234	2327.16	3282	1487.16	1989	673.196	844	1199.07	1773	3085.65	3958	1508.75	2310	2148.76	2500	659.791	696	486.162	584	689.106	875	1833.36	2338	1238.13	1160	1292.79	1966	479.692	692
5	6	PWM	PWA	1901.55	2066	1570.3	1842	570.399	595	1855.82	2823	2217.88	3297	2136.05	2959	2046.07	2521	3393.61	3231	2801	3969	2170.23	3120	1323.06	1733	679.334	855	1131.54	1708	2834.99	3740	1505.67	2243	2060.55	2463	732.219	660	473.264	544	712.502	893	1620.68	2069	1140.94	1216	1274.57	1926	464.575	683
6	6	PWM	PWA	1732.55	1957	1534.57	1761	572.422	653	1788.06	2747	2234.06	3220	2057.19	2781	1918.7	2445	3278.37	3099	2603.05	3754	1974.34	2861	1266.65	1736	676.265	842	1108.01	1657	2578.2	3391	1447.21	2172	1979.53	2402	678.642	681	463.342	525	910.301	997	1514.33	1892	1134.86	1222	1256.35	1893	472.637	681
7	6	WGA	28	2945.35	1878	5481.96	1695	3350.54	652	3697.11	2649	3712.45	3089	3918.22	2599	6218.06	2301	4747.29	2954	3634.06	3543	3675.84	2636	2681.21	1884	1484.45	820	1872.75	1320	7011.73	3334	2303.28	2025	3256.33	2279	1856.72	682	1460.83	488	2199.56	931	6340.17	1801	2313.31	1220	2620.15	1870	754.095	663
8	6	WGA	28	2936.45	1811	5495.82	1647	3326.24	653	3504	2520	3736.75	3253	3925.54	2433	5874.71	2133	4573.52	2672	4173.15	3540	3745.14	2732	2646.56	1895	1409	830	1671.94	1398	7274.67	3593	2281.22	2013	3184.88	2199	2017.85	679	1512.05	472	1934.48	804	6197.77	1739	2235.4	1202	2594.18	1850	691.032	665
9	6	WGA	28	2971.09	1872	5816.48	1648	3474.59	716	3460.52	2556	3869.75	3398	4051.16	2621	6007.65	2011	4806.96	2755	4706.13	3970	3949.97	2981	2920.7	2114	1455.6	835	1650.86	1571	7223.64	3818	2340.06	1991	3223.75	2241	1904.74	675	1446.96	451	1993.63	796	6032.37	1658	2156.53	1171	2588.41	1828	730.113	685
10	6	DSL	29	3376.53	1944	3972.33	1638	4426.32	685	3125.69	2124	3592.72	3447	3530.79	2704	6439.05	2081	7023.47	2850	5134.84	4217	3656.22	3240	4905.81	2150	1170.91	824	1751.59	1417	7669.33	3969	1909.53	2003	3348.61	2207	1045.17	677	607.418	446	856.349	805	3945.12	1504	1965.47	1177	1704.07	1775	561.025	615
11	6	DSL	29	2994.02	2051	4258.63	1745	4417.19	719	3348.77	2320	3539.23	3432	3657.84	2708	6413.64	2277	7132.04	2984	5328.27	4178	4011.04	3479	5062.45	2300	1108.91	790	1695.55	1545	7695.57	3977	1931.49	2080	3419.12	2207	1088.15	678	661.712	463	826.78	800	3576.65	1349	2079.08	1260	1738.26	1772	569.777	672
12	6	DSL	29	3107.62	2144	4240.08	1843	4499.38	731	3066.99	2360	3905.81	3605	3689.03	2764	6467.92	2356	6932.23	3059	5438.64	4018	4281.61	3664	5017.36	2369	1186.41	763	1665.74	1571	8065.2	4185	2034.36	2120	3550.89	2202	1135.66	733	576.877	432	805.172	791	3449.28	1256	2250.04	1399	1727.23	1756	589.907	695
13	6	HPA	30	4206.88	2146	6725.17	1891	5198.59	864	13196.2	2833	12720.5	3947	9355.97	2898	9653.14	2461	10116.5	3272	6602.99	4418	7737.94	3897	9991.53	2527	4672.07	868	4038.59	1573	18382.1	4430	5368.6	2247	6099.43	2354	3666.71	768	3967.21	392	10513.2	812	8278.46	1287	2705.03	1481	5243.36	1716	2651.24	692
14	6	HPA	30	3500.51	2160	6591.63	1921	7324.8	886	11979.3	2872	11932	4058	8392.05	2906	9481.34	2472	9770.14	3398	6399.5	4450	7386.46	3901	9167.79	2583	5411.34	829	3815.82	1517	13552	4555	5361.46	2391	5974.06	2402	3492.82	688	2554.74	380	10251.6	822	6902.41	1257	2711.7	1604	5508.97	1670	2389.04	682
15	6	HPA	30	3172.13	2056	5016.15	1889	2346.99	825	11828.2	2768	10766.4	3967	9916.87	2836	9056.95	2357	9230.61	3441	5203.61	4400	6336.38	3739	7925.11	2556	5293.11	851	3192.29	1513	12800.3	4541	5484.8	2433	6272.71	2328	3532.06	645	4875.86	366	10671.4	800	8109.96	1317	2601.68	1634	5338.94	1635	2862.25	689
1	7	VVL	VVA	3424.4	2373	2076.54	1886	791.208	493	2388.95	3066	2845.86	2895	2270.71	2734	3274.28	2647	3910.19	3329	3581.99	4317	3709.74	3129	1768.54	2110	883.302	711	1437.81	1854	4815.39	3872	1633.46	2174	2680.2	2465	987.549	668	791.646	640	784.079	842	2032.38	2493	1185.42	1262	1507.68	2044	462.776	666
2	7	VVL	VVA	3226.19	2314	2068.05	1891	795.997	495	2448.34	3060	3181.11	2845	2361.68	2954	3194.56	2582	4039.62	3272	3315.51	4308	3766.63	3059	1745.58	2106	878.149	662	1416.17	1763	4861.77	3891	1653.42	2191	2832.86	2465	970.47	665	762.512	623	777.848	722	2074.95	2475	1232	1255	1496.27	2000	470.24	646
3	7	VVL	VVA	3059.12	2231	1954.78	1838	892.743	497	2266.34	2971	2627.46	2780	2387.95	3023	3024.79	2544	4064.95	3212	3227.68	4183	3570.01	2957	1723.63	2073	741.067	804	1391.43	1750	4539.16	3801	1621.49	2217	2834.86	2453	986.544	658	701.23	590	770.579	832	1939.95	2367	1228.2	1229	1488.66	1956	461.843	633
4	7	DBA	32	2337.49	2083	1543.88	1768	5393.63	546	3237.47	2786	4244.47	3233	2677.79	2535	4813.29	2510	3701.23	3302	5019.95	3562	4773.31	2615	1779.9	1949	670.613	740	1373.3	1632	5001.41	3382	2304.58	2083	2445.88	2323	1220.85	683	734.749	582	1421.89	849	3848.7	2170	1487.36	1158	1487.36	1858	418.867	556
5	7	DBA	32	2150.56	1969	1527.74	1734	5626.26	598	4170.15	2382	3911.67	3223	2427.91	2241	3530.22	2512	3765.92	3198	5039.59	3380	4459.02	2636	1591.1	1852	776.551	644	1363.58	1572	4154.89	3336	2248.24	2020	2369.87	2261	1240.74	657	740.965	552	1576.87	859	3507.99	1887	1535.47	1190	1457.03	1832	436.047	540
6	7	DBA	32	2027.35	1906	1495.45	1678	5669.34	650	3817.97	2243	4622.49	3174	2372.97	2222	4211.63	2247	3552.37	3035	4737.3	3435	4385.9	2219	1382.67	1664	657.006	727	1514.22	1135	3418.18	3267	2298.32	1979	2183.86	2157	1241.99	640	699.938	517	1814.27	970	3364.08	1773	1558.48	1202	1430.88	1789	409.867	544
7	7	SBA	33	1938.09	1792	1988.12	1590	9339.49	664	7421.1	2599	2427.94	2993	4020.58	2477	3189.13	2097	4041.6	2739	4496.41	2824	3746.5	2109	1912.69	1723	2866.61	834	1089.82	1539	4605.08	3053	1865.28	1548	5273.19	2245	2097.12	672	1183.4	496	1895.01	890	4077.55	1697	3758.66	1208	2551.42	1680	613.443	585
8	7	SBA	33	1912.55	1703	3131.18	1535	9585.51	637	5019.88	2467	2413.19	3128	3830.39	2388	2536.39	1966	4102.77	2468	5353.9	2773	3644.05	2291	2160.61	1639	3195.61	859	1119.73	1537	5271.5	3295	1805.69	1570	5275.74	2210	2267.44	663	1165.66	468	1533	784	4384.67	1622	3805.14	1179	2286.35	1591	556.088	564
9	7	SBA	33	2032.82	1759	2216.94	1590	10560.4	721	5577.34	2387	2521	3247	4188.78	2537	2149.34	1832	3700.42	2699	6288.21	3278	4008.76	2610	2606.26	1683	3293.75	858	1131.88	1564	4182.62	3595	1661.81	1743	4957.34	2277	2350.83	662	1137.27	455	1432.37	766	3614.9	1595	3928.25	1156	2256.2	1532	714.021	570
10	7	PTL I	WBA I	2667.69	1982	2028.98	1633	504.416	753	1558.56	2546	2517.62	3513	2205.22	2762	1812.06	2116	2751.24	2925	2928.82	4178	2844.6	3209	1706.76	2224	843.907	890	1521.57	1623	3833.94	3942	2110.15	1782	2657.47	2207	673.108	676	404.407	461	505.855	744	1154.62	1408	895.788	1119	1152.81	1750	475.033	624
11	7	PTL I	WBA I	2755.78	2031	2580.97	1617	472.472	735	2013.95	2273	2822.2	3321	2217.19	2790	1920.71	2287	2951.04	3023	3037.23	4343	3093.67	3262	1760.52	2341	857.76	873	1576.99	1643	4428.49	4252	1824.78	2074	2624.03	2201	717.439	687	397.17	424	533.075	711	925.51	1261	1040.27	1154	1120.88	1800	484.012	692
12	7	PTL I	WBA I	2820.48	2145	2440.56	1720	488.815	742	1690.05	2633	3084.44	3410	2145.37	2793	2016.47	2377	3080.87	3121	3223.59	4436	3006.77	3642	1852.8	2391	833.516	879	1561.98	1651	4259.94	4270	1923.99	2141	2498.07	2171	868.526	735	462.309	416	642.715	712	933.071	1147	1079.81	1280	1111.75	1757	488.909	711
13	7	WFA	WFL	4913.86	2107	15237.3	1810	9779.56	782	9342.53	2689	17939	3737	8017.88	2783	14278.4	2382	6279.1	3259	2425.92	4406	2327.67	3644	2014.67	2375	1689.21	773	1629.38	1270	8656.7	3913	1497.96	2221	2401.88	2286	2014.5	773	1142.26	402	1003.44	781	2691.53	1217	1764.99	1386	3673.8	1703	785.464	674
14	7	WFA	WFL	4878.37	2139	27975.8	1874	9363.12	874	7057.94	2777	14078.3	4013	9345.48	2734	12702.2	2346	9445.37	3285	2449.22	4469	2445.44	3694	1669.55	2436	1661.69	815	1099.81	1260	12536	4154	1550.92	2291	2342.47	2374	1755.08	707	1167.4	377	956.408	766	2717.66	1185	2021.72	1394	3423.01	1676	816.571	686
15	7	WFA	WFL	4684.4	2008	31827.3	1810	9454.47	830	6390.75	2516	14955	3940	6574.12	2740	10596.4	2303	10405.9	3322	2357.27	4380	2813.86	3627	2403.87	2401	1831.63	793	2743.55	1199	8805.69	3971	1355.39	2390	2136.05	2216	1540.66	643	1089.31	371	1131.49	780	2901.89	1210	2035.98	1490	3061.7	1683	779.909	694
1	8	CSA	36	5987.06	2330	1995.18	1879	1162.62	467	5312.7	2979	9069.87	2864	2459.8	2701	5340.16	2697	3574.82	3263	6398.42	4282	9746.54	3178	2853.02	2132	877.417	639	1430.34	1679	6794.94	3880	2194.26	2235	3850.06	2547	3283.44	711	1591.56	654	1075.64	793	4129.92	2504	1271.17	1305	2469.5	2233	513.231	634
2	8	CSA	36	3093.63	2258	1709.62	1869	1514.32	519	2695.04	2820	10985.1	2983	3467.73	2884	3999.28	2638	2998.49	3451	7659.89	3990	4315.57	3103	2573.22	2087	527.903	810	1658.78	1466	6559.24	3762	2001.56	2277	3612.95	2557	3415.69	706	1497.31	623	771.156	858	4125.74	2398	1379.93	1338	2414.15	2190	534.001	597
3	8	CSA	36	3046.03	2197	1559.28	1835	1485.18	516	2983.43	3000	17777	2989	2861.54	2810	2385.16	2619	3875.32	3237	8102.83	3775	6993.11	3108	3105.31	1808	533.554	827	1766.94	1475	6782.02	3912	1907.98	2298	3464.66	2535	3605.71	690	1444.11	602	733.488	848	4026.33	2357	1532.39	1296	2272.37	2101	459.63	689
4	8	Black bean crude	37	18135.9	2091	17898.1	1860	15422.7	535	13800.7	2820	10151.1	3086	14279.6	2958	18093	2587	22582	3285	13830.8	4146	19571.2	3162	23375.3	2049	6093.21	847	17818.4	1751	18361.4	3799	23052.2	2228	20468.9	2461	13484.6	689	8264.95	611	13999.5	865	20757.1	2121	12017.2	1280	11698.3	2054	5820.29	677
5	8	Black bean crude	37	17561.6	2029	18005.1	1792	15745.2	558	14458.3	2770	10950.1	3108	14435.1	2806	19807.1	2514	22314.5	3169	14074	3916	19862.4	3025	23816.4	1977	6160.23	840	18468.2	1706	18625	3598	22788.6	2185	21053.6	2460	12925.1	688	7903.6	574	13734.8	906	19422.4	1886	13388.5	1251	11928	1977	5945.03	662
6	8	Black bean crude	37	16819	1929	17577.1	1705	15076.2	612	14933.7	2661	10155.2	3062	13563.3	2666	18542.8	2434	21480.5	3005	14196.5	3691	19017.3	2746	23409.6	1942	5602.48	839	15890.7	1641	18676.1	3356	21959.5	2130	21398	2375	11596.8	698	7502.37	552	13986.5	975	19097.5	1781	13237.4	1237	11319.5	1934	5815.96	649
7	8	GSL-IA4	38	2719.21	1796	1449.45	1639	1135.59	638	2350.5	2611	16162.2	3116	2203.31	2460	4938.66	2307	4090.17	2837	3481.48	3429	3586.66	2515	1238.11	1822	1361.85	752	1400.62	1382	8493.16	3367	1462.59	2106	2938.96	2293	1450.5	685	411.745	525	1330.54	930	3512.57	1735	1765.1	1232	1846.07	1922	581.376	655
8	8	GSL-IA4	38	2279.05	1732	1229.69	1617	1831.13	642	1961.54	2537	21457.3	3187	2113.32	2409	4547.05	2133	3929.96	2570	2852.79	3420	2577.39	2662	1373	1804	906.573	857	1392.66	1353	7269.48	3550	1368.85	2025	2793.53	2285	1475.55	681	461.06	497	1047.12	813	3333.24	1719	1732.71	1210	1776.23	1793	647.846	568
9	8	GSL-IA4	38	2276.55	1800	1385.59	1603	1053.22	694	1914.26	2490	18765.1	3379	4017.98	2572	4935.69	2036	4265.21	2706	3579.44	3805	2906.59	3038	1434.83	2023	810.15	857	1216.72	1560	6231.7	3653	1485.33	1973	2852.11	2315	1416.06	686	418.007	483	971.882	808	3268.03	1628	1656.8	1183	1845.05	1857	591.675	666
10	8	IRA	39	1916.39	1933	9407.47	1588	2396.49	740	4249.58	2539	4211.37	3428	3788.51	2652	6699.79	2077	4583.86	2872	7206.24	4034	6458.48	3271	3869.06	2115	2166.06	868	3133.05	1597	7635.82	3750	3464.9	1975	4776.06	2331	2693.74	667	645.047	461	2370.08	728	6169.15	1480	2684.56	1144	3391.79	1827	2186.02	704
11	8	IRA	39	5833.46	1984	7879.24	1670	1838.23	739	4513.85	2604	3929.05	3464	3823.95	2722	6782.47	2246	4493.3	3017	7179.71	4212	6914.37	3460	5254.83	2165	2308.27	874	3038.63	1638	7905.44	3996	3514.28	2037	4569.09	2321	2565.87	677	568.71	436	1805.21	782	6273.24	1258	2720.37	1210	3434.32	1843	2505.52	729
12	8	IRA	39	5523.67	2078	7630.08	1755	1449.78	763	4482.01	2626	4151.93	3539	3185.31	2762	6039.1	2351	4394.86	3077	7348.56	4267	7078.4	3657	3829.26	2377	2044.33	878	3360.58	1569	8317.27	4255	3785.34	2145	4616.37	2332	2534.39	741	600.199	427	2005.79	789	9251.56	1150	2865.85	1300	3278.77	1772	2503.42	757
13	8	IAA	40	3633.74	2083	2574.87	1736	6644.65	849	6147.65	2727	6859.29	3787	2848.83	2770	4302.22	2438	4958.48	3174	4790.4	4463	4150.11	3767	3243.59	2470	3266.77	893	2584.59	1618	14330.3	4338	2487.82	2224	3666.11	2360	4414.49	770	1139.99	412	2230.23	818	2915.57	1199	4777.67	1403	2885.62	1732	1176.13	780
14	8	IAA	40	3675.21	2119	2531.38	1759	8073.67	893	5464.71	2702	4554.5	3995	2907.68	2797	4245.16	2426	4805.11	3165	5250.4	4451	4644.65	3803	2935.24	2528	2217.36	901	2593.89	1579	11024	4346	2426.58	2355	3848.89	2420	4309.59	700	1081.6	396	2099.58	795	2943.08	1177	4852.89	1510	3094.57	1766	1168.68	798
15	8	IAA	40	4035.24	2005	1972.11	1710	7404.5	882	6441.49	2644	6320.97	3872	3317.84	2735	4246.94	2316	6357.48	3176	5960.62	4377	4363.26	3627	2834.98	2436	2030.25	891	3465.49	1519	16134	4298	2508.24	2354	3659.31	2290	3950.38	646	1052.91	387	1840.57	785	3021.01	1171	4451.71	1578	3147.85	1766	1109.02	817
1	9	HMA	41	2230.7	2292	1982.85	1850	515.395	456	2659.17	2911	2032.57	2745	2074.45	2486	2266.85	2687	3100.25	3171	3241.63	4355	2873.73	3393	1884.54	2215	756.929	753	1666.34	1890	3592.67	3888	1642.84	2053	2179.56	2449	1147.76	740	779.487	683	832.902	877	1947.89	2509	1292.79	1315	1825.46	2292	681.444	760
2	9	HMA	41	2222.93	2227	2003.26	1835	613.059	476	2826.45	3057	2084.79	2863	2314.47	2855	2364.95	2647	3124.06	3257	3313.9	4367	2849.33	3349	2009.36	2185	828.234	814	1792.5	1667	3695.79	3975	1782.47	2231	2436.04	2552	1161.12	744	851.998	663	866.716	879	2067.13	2489	1282.94	1360	1796.91	2369	705.95	749
3	9	HMA	41	2169.47	2182	1800.11	1818	596.62	517	2634.03	2955	2117.66	2411	2418.29	2955	2250.66	2592	3125.97	3261	3246.32	4276	2985.42	3158	1959.62	2129	896.248	833	1582.97	1814	3757.22	4014	1759.69	2292	2492.48	2554	1003.7	724	686.941	656	840.91	876	1821.53	2251	1226.82	1330	1772.29	2043	658.824	755
4	9	GHA	42	8257.55	2075	8209.02	1818	2399.5	537	5214.13	2837	11064.9	3190	4504.36	2920	11347.3	2524	5422.98	3238	8658.43	4113	7935.82	3148	3321.25	2073	2407.96	846	3624.44	1761	13443.8	3990	5430.03	2309	5986.38	2545	2923.79	700	2174.9	644	1219.38	870	6752.33	2025	2399.8	1300	3023.28	2172	1133.54	736
5	9	GHA	42	8244.07	1988	9437.68	1748	2816.85	555	5582.51	2881	11606.9	3116	3816.07	2804	10852.1	2453	4393.94	3126	5238.24	3770	7850.86	2998	3538.13	1996	2236.47	810	3984.38	1697	12567.6	3799	5473.91	2288	5729.68	2494	3284.43	686	1851.98	619	1880.84	882	6353.25	1871	2410.6	1261	2975.44	2064	1113.08	712
6	9	GHA	42	4956.42	1899	9856.22	1688	2714.46	599	9931.88	2700	11232.9	3072	4656.79	2630	6249.47	2352	4731.31	3044	6861.38	3713	5880.9	2687	3581.11	1917	2112.32	800	3753.05	1653	11595.9	3467	5206.93	2249	5605.53	2427	2959.67	695	1566.77	569	1797.41	962	6511.07	1770	2642.09	1227	2897.51	1989	1045.64	699
7	9	MNA-G	43	6128.89	1722	11534.9	1590	1508.8	616	3232.94	2548	5641.61	2851	3976.86	2428	5798.12	2234	4420.7	2774	6506.99	3439	4003.32	2469	2803.84	1805	1606.79	820	3804.92	1620	5683.64	3416	2835.08	2013	4157.83	2269	3133.79	677	1148.79	524	1709.02	929	2731.79	1723	1600.39	1202	1714.23	1897	635.728	641
8	9	MNA-G	43	5879.53	1640	12099.5	1580	1952.32	642	3419.76	2166	5500.42	3077	3444.73	2316	5646.25	2112	4452.48	2490	6413.92	3338	4633.89	2606	2892.26	1833	1646.71	864	3745.57	1585	6175.71	3513	2672.19	2023	4015.4	2281	3082.01	681	1153.68	502	1326.19	770	2457.67	1667	1612.8	1185	1706.21	1843	649.533	666
9	9	MNA-G	43	5883.73	1764	11840.3	1569	1354.78	687	3689.29	2417	5682.96	3141	3425.89	2431	6297.28	2054	4411.28	2663	6787.38	3762	4894.5	2973	2848.05	2037	1548.51	860	3806	1613	5789.4	3648	2606.32	1895	4171.18	2303	3116.2	687	1099.95	487	1154.16	768	2482.24	1592	1610.61	1159	1662.42	1746	673.692	688
10	9	RCA I	RCA120	5581.25	1942	6502.38	1619	2880.09	740	2337.53	2508	11981.5	3376	6176.46	2596	10956.7	2147	11303.4	2781	4309.1	4057	2979.35	3276	2352.15	2230	1792.57	875	2614.22	1638	8203.29	3778	8163.58	1988	5648.8	2329	4430.7	695	2809.12	483	2596.04	808	4646.44	1529	2853.24	1188	3080.63	1908	2296.6	749
11	9	RCA I	RCA120	5717.4	2023	5787.26	1691	3304.87	739	2769.83	2513	12033.5	3505	5604.84	2676	10401.7	2277	12685.1	2842	3987.49	4216	3082	3427	2485.06	2301	1901.55	893	2805.76	1636	7895.51	4009	7905.3	2011	5922.83	2328	3474.81	693	2784.94	461	2796.93	813	2741.2	1346	3408.73	1258	3572.23	1922	2619.27	782
12	9	RCA I	RCA120	5948.28	2118	6865.86	1752	2813.06	776	3598.08	2607	12462	3580	6166.05	2742	10949.4	2408	13101.6	2982	4158.39	4322	3191.18	3618	2481.5	2363	1822.95	899	2844.07	1619	7094.99	4214	8028.14	2116	6070.24	2362	5342.04	751	2983.5	445	2892.84	805	2510.5	1196	3208.4	1354	3160.76	1836	2760.51	816
13	9	GSL I-B4	BSL I-B4	3601.7	2043	1732.38	1692	619.786	630	2269.31	2207	3900.92	3528	2287.67	2703	3601.83	2399	3847.48	3059	3262	4246	3101.53	3570	1704.32	2350	671.587	844	980.7	1514	4708.47	4073	1569.87	2083	2277.24	2153	1490.1	770	499.371	424	804.705	647	1926.45	1144	1448.67	1409	1486.51	1731	629.586	775
14	9	GSL I-B4	BSL I-B4	3654.95	2100	1672.6	1634	568.262	812	1987.05	2453	5606.45	3742	2323.05	2717	3538.15	2295	3900.05	2840	3369.9	4264	3516.54	3489	1761.5	2381	663.307	844	974.26	1488	4043.32	3825	1612.85	2200	2465.06	2208	1232.39	684	484.482	409	733.31	749	1467.83	1170	1596.78	1502	1589.21	1754	648.574	798
15	9	GSL I-B4	BSL I-B4	3771.24	1981	2019.3	1693	795.268	814	1738.39	2390	8072.9	3736	2384.71	2663	3575.55	2216	4284.19	3059	4211	3567	3992.42	3413	1770.72	2334	726.785	875	952.181	1432	3962.36	3890	1733.39	2296	2251.08	2174	1107.55	639	453.557	391	757.512	750	1488.4	1174	1689.76	1615	1605.43	1782	670.559	811
1	10	EEL	46	2685.63	2286	4385.75	1844	1460.31	509	2664.21	2692	2812.79	2894	2571.93	2536	4530.27	2649	3549.37	3094	5524.79	4308	4177.53	3329	5347.55	2087	1765.31	736	1875.52	1807	5047.7	4107	2309.08	2091	3208.97	2588	1245.51	714	1241.58	684	1280.2	813	5637.43	2404	2244.54	1458	2750.22	2446	995.142	744
2	10	EEL	46	2411.01	2230	3728	1825	1096.08	474	2983.44	2804	2901.08	2946	3109.48	2743	4383.35	2555	3379.98	3297	11057.4	4047	3901.57	3267	5280.24	2057	1765.31	764	1482.59	1725	5078.37	3975	2367.41	2090	3202.72	2543	1291.67	708	1293.64	672	1224.13	834	5649.36	2303	2270.83	1472	2685.04	2380	954.045	730
3	10	EEL	46	2416.99	2187	3586.58	1784	1053.63	496	2486.76	2678	3174.47	3129	3825.92	2792	4311.62	2506	3595.17	3198	7877.17	4135	3955.41	3159	5493.38	2023	1907.14	784	1466.3	1581	4966.24	4059	2319.5	2114	3132.94	2560	1203.27	701	1248.45	643	1264.69	817	5890.37	2118	2210.9	1416	2556.78	2272	954.045	725
4	10	PNA	47	1653.57	2088	1358.03	1706	511.451	499	971.457	2736	1707.98	3029	3117.26	2860	5151.4	2320	4176.58	2976	3155.44	3493	4618.22	3060	1159.08	1940	559.13	675	915.687	1661	11061.5	4080	1580.55	1922	2114.9	2511	4026.59	709	1583.21	634	1593.62	730	5093.34	1898	4828.94	1354	2512.44	2122	593.725	655
5	10	PNA	47	1400.63	2001	1172.04	1698	312.53	522	1568.65	2443	1261.27	2893	3673.11	2382	3150.59	2299	4918.11	2821	2263.14	3746	4689.27	2917	1097.09	1850	606.97	646	934.375	1625	10437.3	3797	1571.41	1989	2119.12	2489	3945.56	696	1471.01	588	1501.52	794	4795.66	1790	5423.21	1291	2850.18	1763	610.885	663
6	10	PNA	47	1333	1872	1048.28	1604	367.405	562	1681.83	2264	1052.05	2825	3511.23	2356	5216.86	2247	3579.08	2874	2171.19	3545	4353.53	2638	1074.8	1798	521.007	805	925.405	1561	11940.6	3446	1561.57	1809	2154.28	2280	4014.12	687	1473.09	556	1837.02	825	4488.12	1709	5478.64	1242	2454.43	1771	558.72	639
7	10	BPL	48	8884.03	1733	2677.58	1462	2817.01	592	8318.51	2521	19062.9	2767	9340.77	2394	14864.8	2204	10755.1	2718	4677.47	3234	6471.63	2395	3489.01	1784	1454.91	821	3518.22	1522	10113.7	3285	2411.04	2152	5015.58	2321	3052.57	683	715.288	532	1912.93	946	6335.72	1690	2442.36	1199	2875.27	1893	699.205	678
8	10	BPL	48	8654.83	1659	3376.99	1455	2995.38	628	7792.31	2174	17948.1	3227	10202.2	2270	13523.2	2049	5915.76	2474	7989.68	3129	6243.54	2549	2250.34	1815	1997.62	835	2851.52	1500	10368.3	3496	2209.36	2099	4539.55	2282	2889.7	671	597.753	518	1257.65	753	5837.82	1649	2451.87	1176	3032.26	1891	900.712	594
9	10	BPL	48	8608.45	1771	6934.96	1521	3181.39	650	10943.1	2420	20996.9	3182	9297.44	2438	14431.5	1990	5699.1	2599	4887.01	3672	5654.22	2935	2229.6	1990	2170.87	826	1225.01	1522	7978.18	3522	2336.55	2021	4921.1	2311	2856.12	676	575.925	500	2136.78	757	5841.89	1569	2420.48	1154	3061.75	1858	705.679	661
10	10	ABA	49	5020.21	1959	5751.5	1647	1210.34	699	2152.6	2436	3781.62	3293	2660.82	2600	6025.41	2149	3493.01	2606	5879.84	4006	6493.99	3191	4214.71	2219	1587.67	855	2086.36	1610	4090.47	3743	10308	1985	3121.76	2305	2579.19	692	842.6	493	2491.3	798	2577.21	1537	3622.78	1228	4890.01	1972	1013.13	739
11	10	ABA	49	5177.8	2039	6150.11	1724	1192.4	723	2142.74	2464	3998.59	3384	2545.35	2608	6948.19	2286	3894.17	2716	5816.04	4201	7256.27	3379	4097.94	2288	1610.58	854	2101.98	1610	5023.3	3901	9270.54	1934	3217.43	2272	2533.15	700	802.986	470	2561.69	798	2521.32	1381	3451.27	1326	4875.19	1940	1153.84	767
12	10	ABA	49	5098.49	2109	5820.51	1770	1158.34	728	2370.46	2542	4017.42	3431	2478.65	2646	6253.37	2443	4025.57	2817	6162.04	4293	7213.02	3509	4124.97	2342	1676.17	872	2196.72	1587	4688.06	3957	10058.2	2013	3209.07	2247	2943.21	767	799.774	452	2406.43	789	2371.24	1283	3757.23	1443	4761.91	1875	1139.29	794
13	10	Jacalin，AIA	50	2812.15	1942	20676.7	1772	956.236	664	2682.04	2125	2685.48	3405	3169.65	2539	3810.39	2409	2881.7	2988	8260.49	4188	3817.66	3362	4771.81	2316	1974.73	808	7824.98	1467	3546.07	3601	1865.42	1765	3023.77	2219	3719.61	782	1671.16	429	985.349	761	2321.88	1269	2012.45	1509	2301.27	1808	590.868	768
14	10	Jacalin，AIA	50	2712.48	2049	21511.9	1790	933.332	798	3432.14	2112	2876.72	3487	3117.99	2416	4187.36	2451	2974.02	3070	8576.78	4167	3880.07	3448	4990.78	2332	2041.97	820	7986.34	1421	3413.52	3630	1996.97	2116	3057.57	2308	3496.57	702	1591.27	415	1003.67	725	2338.17	1290	2109.76	1542	2368.56	1881	675.522	693
15	10	Jacalin，AIA	50	3511.08	1943	25099.9	1763	1196.73	780	3693.25	2504	4434.18	3513	4385.19	2663	6016.17	2371	2928.96	2987	8734.39	4116	3962.58	3229	5295.43	2275	2775.77	829	11976.1	1356	5810.87	3378	2353.24	2005	3306.05	2272	3204.72	644	1610.13	406	982.295	735	2539.72	1315	2193.61	1589	2348.89	1907	641.318	823
1	11	ACL	ACA	9718.39	2349	4100.63	1888	709.903	473	2652.41	2975	3188.08	2947	4718.34	2528	3898.53	2669	6540.84	3144	6382.11	4386	5055.4	3364	5747.77	2197	1331.09	786	1985.29	1908	5729.88	4541	2902.78	2230	3295.78	2692	3065.43	719	5287.95	728	2147.33	838	5167.19	2470	2482.87	1549	2556.28	2081	710.85	739
2	11	ACL	ACA	8365	2247	4006.63	1856	792.563	476	2363.91	2864	3190.51	2973	5155.79	2822	3749.95	2579	7090.5	3243	6278.96	4393	5332.61	3304	5342.92	2197	1314.58	835	2045.13	1835	6028.09	4560	2795.19	2323	3402.25	2717	3250.5	737	5248.42	704	1507.63	850	4880.19	2362	2899.24	1558	2267.02	2477	856.862	670
3	11	ACL	ACA	9832.61	2202	3761.01	1832	901.155	483	1906.04	2867	3044.64	3004	5310.6	2913	4187.39	2475	7470.8	3180	6050.75	4280	5014.15	3217	5302.95	2148	1244.42	855	2543.52	1705	5839.26	4524	2788.39	2321	3782.79	2751	3372.48	718	5051.57	689	2100.07	791	4551.69	2140	5224.33	1492	2227.57	2380	765.605	730
4	11	MPL	52	2251.96	2122	5638.22	1712	550.444	466	2000.19	2685	3558.56	2915	2690.26	2451	2512.52	2357	3324.42	2840	3568.67	3595	2312.46	3036	2936.4	1807	1283.17	775	1390.02	1662	3774.21	4286	1799.42	2222	2769.91	2481	1028.72	692	835.106	645	891.486	775	1938.83	1741	1489.84	1376	1751.9	2247	516.691	741
5	11	MPL	52	1915.29	1926	6156.93	1655	669.515	495	1969.9	2578	3518.87	2908	2493.87	2679	2840.57	2204	2999.66	2785	3612.18	3409	2205.08	2871	1454.31	1868	1101.02	779	1478.55	1515	3892.25	3668	1745.13	2196	2886.25	2382	1085.87	705	804.781	622	971.779	792	1953	1641	1378.41	1294	1719.91	2132	511.04	725
6	11	MPL	52	1908.44	1784	5911.28	1532	561.933	537	1990.79	2551	2619.57	2863	2357.82	2537	3006.24	2153	2859.22	2590	3344.64	3291	2010.67	2592	1382.11	1812	1207.87	762	1414.44	1353	3498.44	3472	1753.85	2151	2723.37	2402	1073.04	705	789.618	553	991.852	840	2150.19	1622	1344.36	1276	1604.36	2023	488.435	709
7	11	PHA-L	53	5277.35	1695	4266.6	1478	9666.04	592	7652.02	2407	3294.99	2535	7654.95	2398	13080.5	2243	12968.1	2594	7651.29	3346	17663.8	2409	19225.9	1861	4547.32	842	6017.22	1582	16099.5	3615	27564.9	2107	21405.6	2341	10146.8	698	2153.99	551	8714.05	1016	13627.6	1744	15743.3	1245	9089.92	1957	5096.7	690
8	11	PHA-L	53	5338.87	1685	4044.92	1480	9584.73	630	8268.74	2337	3495.14	2922	7495.4	2351	12697.1	2117	12670.5	2395	7610.26	3250	19229.8	2591	20103.2	1905	4632.1	862	6019.42	1523	16519	3799	27792.2	2129	20383	2300	9797.81	699	2085.07	525	7342.09	778	13097.5	1693	16037.4	1216	8797.05	1898	4993.66	682
9	11	PHA-L	53	5433.6	1843	4295.9	1591	9394.59	648	8335.04	2363	3725.31	2884	7892.55	2499	12872.9	2096	13013.6	2446	7604.4	3646	19727.1	2974	20695.2	2063	4510.99	830	6165.86	1534	17225.9	3864	28496.3	2089	20605.5	2302	9944.28	693	2057.78	508	6824.23	776	12407.8	1620	15783.4	1211	8691.32	1875	4948.94	692
10	11	PHA-E	54	6998.62	1976	6343.54	1620	11623	696	7784.74	2366	6762.09	3137	9389.04	2533	13141.6	2136	11807.5	2422	9475.51	3908	19953.2	3196	13488.2	2196	3619.45	826	5518.85	1512	15254.3	4038	21849.1	1939	16406.9	2274	6586.75	681	3615.08	488	7278.53	785	10607.9	1553	8421.48	1258	8644.39	1903	4750.59	711
11	11	PHA-E	54	7334.99	2030	6550.87	1695	11677.8	720	7071.82	2408	5748.78	3407	7689.05	2615	11353	2284	11123	2548	9503.51	4086	14838.9	3384	13530.7	2309	3649.53	828	5435.3	1484	14598.1	4051	20757.5	1899	16885.4	2249	6891.82	697	3307.24	471	7364.91	776	8745.67	1390	8360.77	1358	7616.13	1875	4756.56	738
12	11	PHA-E	54	7265.51	2092	6179.21	1733	12071.6	704	8453.61	2335	7337.5	3395	7510.85	2651	11718.9	2487	11567.1	2764	9783.51	4198	13723.8	3419	17501.8	2329	3760.93	812	5737.2	1472	15087.2	3974	19449.3	1886	15711.7	2229	9934.2	757	3408.47	448	7630.39	772	9747.9	1324	8270.65	1459	7685.38	1892	4918.58	764
13	11	ECL	55	2618.45	2067	2376.77	1788	699.994	672	2503.2	2309	2541.91	3427	3197.77	2658	3474.34	2540	5321.75	3014	4477.51	4182	3927.54	3407	2719.97	2087	976.011	746	1446.51	1448	5410.27	4171	2083.07	1871	2642.35	2210	2119.55	811	1151.46	430	1269.12	725	2249.75	1329	2562.66	1487	2708.2	1749	1106.01	775
14	11	ECL	55	2566.8	1905	2369.95	1826	744.348	725	2350.79	2300	3731.42	3179	3117.07	2683	3498.95	2534	5507.77	3200	4865.47	4162	3953.12	3437	2779.66	2330	1009.99	774	1419.75	1244	5623.39	4307	2216.58	1979	2667.56	2244	1764.37	691	1107.86	420	1295.59	783	2251.07	1378	2969.36	1626	2912.24	1837	1162.88	795
15	11	ECL	55	2711.02	1974	2397.24	1824	777.412	758	3162.87	2224	3237.87	3340	3582.61	2657	3542.26	2440	5750.88	3230	4828.16	4091	4079.96	3310	2727.43	2257	1121.18	750	1375.48	1213	5684.13	4032	2387.45	2051	2707.71	2279	1474.58	651	1179.67	408	1290.3	737	2313.27	1402	2917.68	1657	2851.03	1818	1185.23	806
1	12	MAL I	56	2992.76	2359	1812.18	1843	519.554	457	1802.66	2942	4186.45	2855	1894.19	2592	2812.13	2661	2920.17	3297	3051.92	4227	2429.71	3288	1453.45	2081	637.704	744	1421.5	1887	4915.01	3773	1630	2265	2629.17	2719	823.404	741	697.964	733	739.466	871	2203.11	2570	1632.67	1595	2041.88	2593	587.348	785
2	12	MAL I	56	2699	2245	1735.07	1801	418.722	490	1741.85	2943	4025.58	2896	2007.67	2788	2764.72	2626	2853.33	3386	2887.45	4254	2328.44	3236	1400.79	2067	646.235	780	1293.54	1806	4276.24	4385	1688.21	2267	2581.54	2716	911.32	645	704.397	721	762.404	888	2157.23	2453	1691.87	1611	2047.07	2549	602.007	783
3	12	MAL I	56	2636.57	2206	1614.81	1760	421.801	452	1647.18	2810	3667.67	3032	1975.02	2853	2756.95	2535	2449.15	3254	2838.84	4143	2270.1	3134	1341.65	2004	636.637	815	1272.21	1794	4225.05	4327	1668.1	2236	2512.74	2667	813.755	733	707.613	717	746.02	876	2031.62	2183	1598.4	1582	1928.67	2457	594.189	774
4	12	CY3	68	2687.35	2127	1964.41	1725	478.385	472	1941.57	2455	2046.48	2879	2771.04	2879	3646.78	2520	3751.17	3111	3800.34	4123	3220.46	3130	2164	2000	975.418	880	1517.56	1812	4089.42	4356	2091.08	2307	2822.41	2645	1149.9	749	720.675	697	994.137	889	1929.29	2082	1571.22	1533	2096.01	2399	751.983	808
5	12	CY3	68	2707.79	2034	1864.36	1639	499.185	492	1918.06	2330	2100.74	2950	2577.33	2737	3537.74	2428	3368.4	2830	3642.59	3879	2984.95	2953	2085.13	1970	985.417	888	1444.24	1760	3933.89	4229	2073.38	2318	2803.6	2586	1140.36	737	698.419	661	1029.53	904	1864.94	1976	1497.45	1416	2041.21	2250	750.03	802
6	12	CY3	68	2567.93	1918	1639.52	1507	571.53	574	1913.54	2509	1975.94	2959	2442.78	2609	3562.1	2354	3001.86	2746	3412.64	3692	2857.2	2689	1961.82	1894	954.31	930	1374.25	1707	3978.33	4009	1990.4	2268	2722.83	2498	1106.45	719	658.146	614	1022.02	916	1778.08	1932	1408.93	1364	1957.96	2136	776.398	777
7	12	CY5	69	8250.09	1862	5998.13	1618	6431.32	646	9313.74	2685	8751.29	2808	6236.47	2514	8801.1	2453	6533.52	2608	7779.1	3448	6922.57	2510	6154.83	1907	7050.53	1251	7660.82	1833	10626.2	3969	8404.78	2394	8026.99	2476	3980.02	746	3347.96	601	5209.46	1080	5795.87	1956	6196.44	1336	7545.46	2152	3556.03	761
8	12	CY5	69	10659.9	1858	8409.32	1729	6313.99	702	9343.98	2613	9098.44	3123	6436.47	2460	8996.04	2371	6439.85	2496	7792.98	3414	6844.87	2663	6594.2	1981	7014.3	1254	7724.22	1692	11225.1	4258	8474.49	2314	7546.04	2393	3785.82	750	3782.09	589	4744.5	910	5701.03	1872	5973.01	1285	7398.39	2086	3554.01	721
9	12	CY5	69	9700.22	2069	7162.5	1811	6109.57	779	9168.59	2665	9235.12	3276	6257.56	2562	7736.93	2338	6347.02	2552	8402.54	3820	7337.89	3051	6508.18	2141	7126.4	1092	7207.92	1659	11102.9	4463	8006.08	2257	7728.66	2374	4066.84	754	3363.83	544	4567.53	843	5610.81	1817	5943.32	1303	7355.97	2064	3547.93	746
10	12	printing buffer`1	70	1649.79	1874	1410.03	1640	441.191	688	1306.07	2280	1851.54	3017	2226.27	2475	1970.03	2184	2366.32	2483	3065.22	3804	2494.81	3066	1672.29	2122	630.054	801	1100.54	1426	3548.69	4118	1534.34	1950	2316.71	2256	558.747	646	462.651	474	622.718	717	1291	1499	1172.82	1240	1401.87	1743	530.43	665
11	12	printing buffer`1	70	1747.79	1979	1405.27	1631	412.021	687	1319.2	2293	1954.37	3099	2253.25	2525	2020.87	2302	2638.12	2789	3202.46	3943	2680.73	3208	1736.53	2176	590.933	747	1050.09	1354	3662.96	4130	1579.36	1885	2321.58	2258	580.542	658	440.856	453	613.605	715	1289.99	1363	1215.09	1359	1451.03	1722	563.705	684
12	12	printing buffer`1	70	1804.87	2059	1447.13	1711	387.227	664	1328.68	2231	1903.32	3138	2362.17	2614	2240.8	2476	3009.51	3172	3310.51	4021	2685.59	3234	1788.12	2224	598.139	745	1053.18	1338	3609.43	4173	1514.87	1908	2393.37	2248	706.36	735	436.893	445	591.329	727	1233.29	1319	1333.06	1447	1465.77	1737	605.787	718
13	12	printing buffer`8	71	1764.17	2074	1501.61	1782	507.858	710	1791.33	2476	2719.11	3374	2428.96	2861	2283.51	2653	3390.99	3604	3313.13	4277	2714.64	3451	1840.3	2428	636.035	818	1072.61	1448	3640.16	4482	1410.73	1973	2141.81	2265	716.83	827	425.05	446	613.404	799	1384.09	1404	1417.03	1619	1561.98	1952	591.289	794
14	12	printing buffer`8	71	1743.49	2018	1480.93	1799	534.535	743	1691.54	2413	2806.06	3441	2452.86	2872	2375.98	2695	3620.58	3858	3350.17	4300	2732.19	3429	1899.76	2468	618.735	824	1036.99	1418	3954.61	4624	1508.13	2055	2168.08	2327	624.955	735	420.002	430	617.598	808	1424.98	1433	1501.16	1725	1638	1993	619.679	775
15	12	printing buffer`8	71	1616.71	1933	1490.82	1775	556.272	769	1590.76	2352	2697.38	3507	2312.6	2826	2322.99	2634	3749.41	3940	3270.24	4191	2655.18	3296	1859.8	2328	601.435	808	997.303	1371	3787.72	4459	1543.16	2112	2164.8	2329	559.33	669	413.944	414	625.986	812	1441.76	1470	1582.25	1802	1645.1	2046	636.321	805
[truncated: 34 more columns]

## Sheet: PB（PBC1+）
				orin5		orin6		orin7		orin8		orin9		orin10		orin11		orin12		orin13		orin14		orin5		orin6		orin7		orin8		orin9		orin10		orin11		orin12		orin13		orin14		orin5		orin6		orin7
				1		2		3		4		5		6		7		8		9		10		11		12		13		14		15		16		17		18		19		20		21		22		23
Column	Row	Name	ID	PB311F635 Median	PB311B635 Median	PB312F635 Median	PB312B635 Median	PB313F635 Median	PB313B635 Median	PB314F635 Median	PB314B635 Median	PB315F635 Median	PB315B635 Median	PB316F635 Median	PB316B635 Median	PB317F635 Median	PB317B635 Median	PB318F635 Median	PB318B635 Median	PB319F635 Median	PB319B635 Median	PB320F635 Median	PB320B635 Median	PB321F635 Median	PB321B635 Median	PB322F635 Median	PB322B635 Median	PB323F635 Median	PB323B635 Median	PB324F635 Median	PB324B635 Median	PB325F635 Median	PB325B635 Median	PB326F635 Median	PB326B635 Median	PB327F635 Median	PB327B635 Median	PB328F635 Median	PB328B635 Median	PB329F635 Median	PB329B635 Median	PB330F635 Median	PB330B635 Median	PB331F635 Median	PB331B635 Median	PB332F635 Median	PB332B635 Median	PB333F635 Median	PB333B635 Median
1	1	LTL	1	1776.1	1348	676.987	954	809.678	656	4314.15	3874	1812.95	1280	1579.55	1359	1144.77	783	1404.94	616	4705.96	902	2022.25	986	3266.99	1240	683.765	993	987.534	569	982.971	959	1811.01	1887	741.176	391	3219.73	611	5113.21	2078	2234.47	950	9926.08	3871	3670.85	2021	2898.47	2381	1411.65	947
2	1	LTL	1	1733.36	1303	843.41	943	957.684	805	3657.02	4059	1855.56	1246	1588.27	1351	1102.42	757	1038.95	591	6940.43	904	2015.94	962	3701.07	1209	665.692	936	932.809	594	992.073	947	1689.96	1832	769.826	393	7319.87	585	4729.66	2373	3130.84	888	8480.41	3862	1894.75	1948	3107.82	2288	1197.73	1098
3	1	LTL	1	1714.93	1331	783.167	926	1017.38	837	3613.33	4036	1820.7	1248	1522.41	1319	1067.54	721	1534.81	550	7994.1	900	2085.38	1021	3136.55	1193	620.509	883	909.178	610	967.499	900	1617.32	1766	744.913	388	6737.99	572	5641.12	2315	3682.46	853	8423.59	4088	2330.3	1807	2862.32	2213	1262.4	973
4	1	PSA	2	3824.1	1425	2736.6	897	4592.16	816	4802.09	3966	3770.5	1230	2852.79	1316	2738.51	711	4670.21	610	3550.91	950	5989.6	1092	2596.13	1149	1696.98	837	4152.07	596	3276.82	863	3917.19	1741	3458.2	372	2214.08	553	4598.64	2251	5956.9	916	13959.6	4073	6379.91	2098	5935.87	2207	4562.89	1119
5	1	PSA	2	3869.23	1438	2652.26	851	4375.77	806	4945.53	3799	3334.22	1185	2819.89	1271	2635.95	717	4921.47	616	3496.17	940	5926.15	1087	2566.36	1048	1715.89	775	3993.18	585	3016.67	811	3809.99	1707	2941.88	359	2312.05	517	4283.65	2099	5784.88	943	17027	3930	6295.42	1996	5910.65	2155	4585.89	1116
6	1	PSA	2	3955.64	1398	2653.84	805	4314.1	798	4630.14	3510	3282.5	1092	2707.05	1183	2748.15	707	4726.68	597	3371.07	952	5914.46	1092	2550.04	963	1680.42	708	3865.65	534	2941.84	749	3968.9	1672	2912.96	353	2308.59	463	3893.82	1939	5979.24	930	16504.4	3711	6312.7	1872	5860.2	2032	4521.08	1170
7	1	LCA	3	2920.34	1390	2272.13	762	5249.06	771	4860.01	3270	5419.69	1131	3163.96	1108	3076.64	719	2850.79	579	3146.64	950	5025.56	1066	1853.17	884	1549.08	648	3700.9	497	2537.59	676	4195.66	1572	1792.1	342	1789.26	423	3400.23	1859	3505.81	903	7912.12	3497	6717.62	1749	5605.76	1939	8287.47	1125
8	1	LCA	3	3027.99	1359	2371.32	744	4292.76	730	4455.94	3015	5192.93	1086	2993	1021	3097.51	773	2999.14	551	2979.99	926	4709.71	1033	1766.87	808	1582.39	575	3747.51	461	2267.87	608	4323.88	1470	1923.97	331	1804.3	385	3444.74	1717	3257.39	869	7569.44	3255	6475.42	1799	5553.51	1955	8257.81	1122
9	1	LCA	3	2906.42	1392	2285	798	4845.07	697	3936.7	2815	4873.56	1045	2785.23	971	3079.48	850	2697.42	534	2700.52	905	4849.95	1051	1768.72	753	1549.84	566	3657.11	460	2373.94	543	4207.53	1441	1974.25	343	1739.14	373	3208.74	1619	3246.01	814	7627.97	2975	6456.86	1860	5613.33	2060	7968.23	1093
10	4	MNA-M	19	5115.72	1567	4476.08	1136	3800.64	808	3526.14	2920	3865	1015	3094.08	1018	3641.68	1032	3019.75	668	4580.72	1363	7183.36	1233	4037.51	911	3411.68	766	1603.66	482	2615.39	646	6910.68	1438	4770.17	453	4824	499	5724.67	2144	5029.26	848	10057	3139	8225.77	1916	6787.1	2106	4566.15	1107
11	4	MNA-M	19	5012.09	1584	4576.48	1173	3544.38	789	3401.48	2753	4015.39	1105	2760.47	1084	3940.1	1062	3729.07	715	4926.59	1411	7342.76	1230	3855.37	870	3598.53	769	1949.69	458	2418.87	634	7430.1	1545	5276.12	456	4919.59	499	5754.01	2031	5369.02	831	9265.9	2977	8427.8	1987	6970.23	2168	4550.65	1084
12	4	MNA-M	19	4602.79	1637	4490.03	1210	3619.46	779	3537.4	3005	3778.58	1109	3125.19	1136	3896.94	1111	3219.62	751	4806.82	1495	8096.96	1244	3925.51	843	3497.2	763	1858.29	429	2774.68	640	6497.56	1630	4994.22	445	4945.66	511	5580.46	2040	5067.14	902	9574.36	2859	8671.7	2097	6363.2	2272	4431.5	1086
10	1	UEA I	4	1715.98	1275	861.743	844	689.642	684	2297.85	2536	1805.19	1039	1130.23	985	909.556	906	709.681	553	2759.19	874	1913.96	1094	1042.97	690	541.643	588	694.765	454	720.163	483	1423.14	1448	2496.38	357	1555.31	370	1633.67	1536	2281.12	782	7179.09	2722	3436.01	1922	2020	2130	866.919	1077
11	1	UEA I	4	1446.37	1485	901.335	902	640.455	670	2163.52	2468	1942.09	1125	1273.5	1095	851.707	933	850.62	594	2780.36	939	2019.6	1114	1027.76	668	513.845	606	742.927	450	791.876	521	1671.47	1656	2618.31	367	1535.36	374	1676.02	1545	2365.82	787	6429.91	2417	3491.76	1971	2052.85	2220	848.474	1053
12	1	UEA I	4	1834.57	1327	924.921	909	633.282	628	2586.73	2912	1906.01	1174	1388.12	1194	889.976	980	911.735	607	2912.97	1002	2032.11	1139	1137.23	688	538.274	627	719.359	431	871.67	571	1741.51	1809	2669.93	366	1802.27	373	1694.96	1571	1953.5	854	6103.27	2306	3626.56	2121	2115.19	2288	855.647	1060
13	1	AAL	5	6774.9	1641	1946.26	982	2777.98	649	4183.76	3340	3053.57	1212	2386.38	1283	3779.03	1002	3616.04	654	8306.42	1041	3641.42	1198	4233.97	653	900.806	640	1802.53	429	2344.19	605	4480.23	1981	5086.14	360	2571.41	362	7029.18	1589	6496.27	923	10721.5	2271	5509.87	2312	4812.88	2374	2388.03	1109
14	1	AAL	5	6918.78	1715	1945.74	985	2754.98	617	4478.39	3512	3222.34	1244	3894.04	1275	3770.66	976	3337.03	670	7798.13	1061	3935.35	1205	3861.16	740	924.999	604	1586.27	378	2732.03	623	4767.13	2046	6088.3	386	3543.5	341	6665.7	1519	6648.32	941	6545.3	2247	6256.4	2413	4588.96	2431	2537.57	1108
15	1	AAL	5	7167.62	1761	1967.87	1003	2634.19	617	4565.17	3554	3420.36	1270	2551.77	1193	4105.51	947	3635.02	674	5906.88	1086	3811.52	1205	2734.57	764	940.956	613	1542.56	350	2498.47	588	4694	2050	5026.35	344	3081.45	316	6853.95	1440	6381.87	937	6567.08	2250	6851.82	2403	4477.78	2418	2438.64	1085
1	2	LAL	6	1861.29	1388	1986.86	961	866.823	709	4346.8	4110	2344.56	1265	1991.28	1335	1621.8	779	1393.11	640	4152.9	1010	4063.87	1116	2795.87	1271	2105.87	1137	1104.21	607	2467.8	966	2734.51	1835	1833.03	375	2169.18	721	2658.63	2785	2953.15	942	10390.2	3998	3624.74	2130	3656.67	2430	1198.78	1110
2	2	LAL	6	1920.9	1433	1898.53	975	877.659	787	6372.73	3805	2496.1	1240	2074.29	1337	1669.53	768	1298.75	643	4030.76	1032	4179.83	1102	2777.88	1263	2049.15	1100	1162.33	627	2538.58	941	2569.46	1778	1877.23	371	2221.13	684	2793.33	2887	2792.19	920	10187.3	4162	3433.55	2135	3759.88	2293	1237.19	1133
3	2	LAL	6	1909.65	1450	1853.91	963	921	818	4065.81	3787	2451.7	1256	2045.33	1321	1688.97	716	1290.27	630	3926.88	1059	3547.61	1138	2830.74	1237	1908.76	1031	1167.26	623	2476.38	907	2513.47	1700	1802.98	379	2225.37	675	2612.97	2854	3342.41	918	10544.8	4199	3234.48	2114	3444.69	2238	1214.54	1075
4	2	TL	7	1277.89	1527	783.252	943	906.643	757	3522.48	4056	806.442	1206	1028.62	1311	628.869	594	486.919	617	1866.32	1108	1048.81	1207	966.066	1203	768.073	943	581.601	591	1055.63	997	1017.59	1616	412.801	366	559.395	699	1805.19	2884	1158.15	937	4023.45	4307	1582.81	2063	1917.65	2333	1207.15	1248
5	2	TL	7	1258.16	1580	802.48	897	811.584	853	3524.49	3905	795.418	1159	982.825	1267	584.31	680	724.764	490	1632.37	1162	977.761	1242	917.714	1126	684.081	852	571.379	561	953.899	925	968.409	1591	438.023	371	527.751	634	1666.09	2618	1035.91	945	3990.58	4175	1461.43	1983	1817.47	2223	1265.42	1277
6	2	TL	7	1472.29	1642	789.324	862	1001.7	768	3365.34	3733	767.434	1111	932.793	1208	587.673	692	608.393	570	1853.67	1186	1012.76	1249	850.612	1020	629.435	766	515.161	535	878.353	870	985.369	1581	448.952	363	469.565	566	1502.75	2410	949.492	896	3781.67	3984	1383.48	1825	1745.62	2131	1220.44	1284
7	2	MAA	8	1307.5	1640	852.235	759	738.764	791	2841.43	3406	1706.59	1170	1154.95	1114	703.036	740	584.223	621	2933.73	1201	2066.14	1174	868.853	940	586.833	686	683.25	535	730.27	758	1424.31	1582	510.654	354	964.179	491	1880.24	2152	1588.37	923	5212.4	3642	1617.5	1750	1857.81	1722	904.239	1123
8	2	MAA	8	1248.45	1596	774.58	808	731.291	742	2730.12	3234	1602.23	1104	1151.97	1038	712.788	788	618.091	616	2851.17	1170	2016.02	1181	840.383	868	523.923	607	652.29	499	642.945	665	1424.31	1504	474.305	347	1054.14	444	1753.49	1984	1608.14	885	5094.77	3428	1732.43	1818	1794.9	1997	899.969	1116
9	2	MAA	8	1251.61	1554	833.558	886	1362.23	669	2449.91	2990	1570.42	1045	980.021	977	815.628	866	810.715	610	2810.47	1116	2050.8	1196	790.825	808	540.633	604	628.804	473	613.196	596	1415.37	1427	507.994	349	1326.14	410	1646.51	1859	1673.26	865	5056.93	3276	1908.52	1831	2047.53	1853	835.914	1097
10	2	SNA	EBL	3772.66	1610	2289.92	960	2041.25	710	3010.39	2783	4081.63	1008	2001.14	977	3167.67	928	6783.54	655	14394.8	1067	5334.64	1182	5780.83	743	1423.3	623	1611.22	470	1674.65	518	3530.65	1439	3784.48	365	13033.6	378	7379.86	1672	8556.09	823	15567.9	2928	4918.12	1929	4651.55	2169	1865.37	1082
11	2	SNA	EBL	3900.87	1574	2412.51	995	1837.93	686	2771.7	2581	3873.58	1071	2157.18	1082	3289.38	955	6283.06	713	14795.4	1117	5581.95	1183	5825.84	711	1533.55	643	1619.29	446	1575.96	562	3597.65	1607	3893.77	381	12516.6	375	7556.38	1658	7412.11	805	13631.5	2686	5008.13	1978	4728.65	2222	1804.85	1061
12	2	SNA	EBL	4001.07	1629	2473.42	1040	1777.42	676	2996.62	2979	3996.12	1131	2359.94	1192	3449.17	1031	6045.81	751	15016	1213	5715.68	1188	5922.64	715	1576.73	651	1695.93	430	1614.21	610	3600.3	1748	3914.46	380	11870.9	382	7644.64	1674	8326.95	867	9375.92	2523	5183.05	2121	4881.31	2286	1875.85	1047
13	2	SSA	10	4893.7	1728	4131.12	1137	1280.66	686	4176.38	3405	2518.24	1221	7501.75	1215	4909.44	1079	1808.1	780	4713.25	1332	6367.61	1261	6233.85	745	1903.22	712	2304.22	422	4325.5	628	3871.12	1946	1671.54	378	1033.99	389	2731.31	1704	5825.02	923	7659.76	2493	6244.54	2339	6802.12	2449	1566.53	1086
14	2	SSA	10	4894.89	1721	4007.93	1136	1177.05	644	4422.48	3618	2633.72	1255	7368.26	1206	5158.35	1091	1914.08	777	4805.39	1368	6591.93	1292	5992.67	771	1950.01	663	2131.55	374	4401.87	628	4161.4	2035	1543.44	422	1031.22	365	2795.8	1617	6113.71	939	7583.67	2490	6406.12	2429	6229.15	2406	1528.15	1069
15	2	SSA	10	4961.42	1720	4283.91	1161	1148.27	656	4502.49	3669	2574.39	1290	6913.77	1154	5115.65	1091	1911.31	751	4857.6	1366	6615.55	1285	6039.01	774	1966.25	654	2077.83	360	4403.08	610	3967.53	2031	1676.75	360	1015.56	330	2749.74	1593	5998.03	934	7747.65	2418	5967.72	2459	6516.59	2444	1633.68	1092
1	3	MAL II	11	1228.54	1475	888.184	1005	547.333	709	3248.59	4153	1345.82	1263	1190.42	1301	645.997	779	640.119	678	1496.14	1179	2096.02	1198	1057.79	1284	907.018	1282	581.859	582	808.063	967	1558	1792	361.834	388	740.067	849	2317.37	3285	965.288	906	5091.91	4091	1799.85	2112	2283.9	2061	828.616	1083
2	3	MAL II	11	1207.06	1499	924.861	1019	608.261	793	3285.1	3999	1381.68	1314	1216.32	1303	658.31	762	676.056	707	1538.11	1201	2068.69	1194	1057.79	1289	901.071	1238	616.385	599	754.257	936	1469.34	1703	398.775	377	704.131	835	2358.21	3330	977.765	904	5066.76	4159	1759.04	2090	2227.4	2138	808.307	1095
3	3	MAL II	11	1094.3	1509	872.324	1040	628.57	794	3219.76	3866	1390.64	1244	1208.35	1303	584.428	716	682.794	712	1484.8	1260	2115.7	1236	1087.86	1272	864.393	1167	607.246	585	744.648	911	1481.3	1643	464.133	410	658.087	795	2444.41	3303	997.048	867	5125.8	4225	1708.57	2032	1972.64	2239	784.951	1084
4	3	SNA-I	12	5245.01	1795	4517.58	1051	3593.17	848	5458.94	3880	6666	1286	4449.96	1280	3446.73	718	14014	741	11304.9	1292	9797.38	1256	11686.5	1224	2776.15	1109	3196.96	612	3218.99	919	4867.25	1629	4307.13	400	19853.2	768	7489.69	3213	10348.6	952	16479	4166	8709.17	2006	8404.03	2239	5019.75	1117
5	3	SNA-I	12	4543	1776	4868.03	1047	3579.55	860	5409.15	3854	6534.65	1213	3941.52	1249	3322.35	724	13740.7	772	11164.1	1341	9870.95	1260	7484.95	1116	2526.19	1001	2950.64	594	3154.08	869	4793.98	1604	4533.59	384	20312	705	7267.65	3025	10463.2	993	17819.1	3991	8737.86	1906	7513.8	2048	4995.64	1118
6	3	SNA-I	12	4571.69	1714	4756.75	989	3728.39	887	5269.54	3752	6876.89	1162	3922.76	1195	3197.96	725	11695.6	775	11165.6	1359	9694.96	1229	7670.5	1020	2487.99	941	3027.15	565	3063.37	845	4783.26	1584	4435.8	366	23425.7	640	7443.25	2780	10640.3	991	15586.1	3840	9148.17	1778	8011.23	1981	5114.09	1113
7	3	NPL	NPA	1594.83	1630	948.689	864	895.704	861	3384.5	3526	1347.87	1100	1064.75	1077	888.895	741	647.264	681	1449.79	1139	1299.6	1097	1203.17	884	860.026	686	547.482	508	948.383	753	1678.96	1447	506.485	350	651.26	524	2730.51	2068	1180.16	822	6114.45	3536	1733.73	1497	1725.37	1672	986.629	1053
8	3	NPL	NPA	1683.6	1494	903.471	830	868.62	833	3292.27	3306	1234.06	1033	1001.73	1002	950.932	783	549.375	605	1369.12	1194	1258.64	1035	1111.26	837	766.044	642	597.781	480	848.131	660	1594.31	1435	481.485	352	625.289	462	2309.5	2217	1121.6	754	4472.26	3296	1903.97	1523	1765.27	1707	996.301	1048
9	3	NPL	NPA	1689.87	1346	968.195	832	844.438	807	3157.93	2998	1205.84	980	1055.35	910	1049.08	855	597.321	608	1537.09	1023	1237.54	1056	1096.64	844	774.024	649	622.93	480	817.053	625	1608.42	1400	534.263	373	611.305	406	2420	1827	1109.44	767	4410.2	3030	1909.2	1651	1841.52	1961	1015.65	1049
10	3	ConA	14	17595.6	1498	5568.86	1068	2295.25	806	4002.85	2811	5951.17	975	7418.94	992	5873.3	947	13850.5	663	16080.2	1259	18615.4	1116	9320.79	838	4395.84	694	2070.18	469	2219.61	573	5923.26	1413	4757.72	393	10366.7	405	16969.8	1914	10521.2	821	37075.8	2999	10677.5	1899	12745.4	2082	4459.17	1067
11	3	ConA	14	17692.3	1486	5665.62	1121	2446.72	778	3760.49	2714	6670.8	1083	6817.03	1067	6095.41	984	14396.2	715	18690.4	1299	18526.5	1135	9381.12	779	4353.42	703	2055.35	452	2512.95	582	6371.06	1558	4689.44	402	10971.6	393	16931.3	1848	9682.89	809	43915.7	2844	10496.6	1960	14525	2162	4592.09	1064
12	3	ConA	14	18511.8	1506	5561.42	1168	2539.39	754	3410.2	2996	5879.57	1116	6465.71	1122	5930.8	1020	15118	753	18640.9	1357	16251.1	1118	5966.49	755	4338.53	678	2021.45	425	2487.13	620	6500.3	1688	5130.06	385	11249.5	387	15937.4	1866	13720.8	872	42218.8	2682	10397.5	2108	13186.8	2274	4551.85	1055
13	3	GNL	15	2144.66	1557	1475.23	1131	998.573	727	2954.47	3223	1450.39	1182	1192.26	1099	1541	1040	906.707	767	1619.8	1313	1218.97	1150	1270.14	735	1208.98	658	677.567	397	992.411	621	2058.17	1763	833.341	370	770.842	378	2171.59	1722	2228.71	890	3400.68	2626	2776.99	2006	2899.17	2306	1088.98	852
14	3	GNL	15	2053.7	1562	1553.13	1208	932.543	648	3100.15	3392	1562.62	1203	1151.68	1084	1541	1032	885.95	723	1651.06	1328	1373.79	1024	1270.14	760	1175.45	644	687.725	366	929.589	622	2040.91	1845	1414.36	372	789.712	359	2119.86	1683	2028.26	868	3246.95	2508	2730.97	2176	2983.98	2334	1060.54	878
15	3	GNL	15	2010.96	1489	1569.89	1200	911.211	656	3114.71	3436	1676.58	1289	1160.31	1099	1513.93	1041	805.752	695	1656.45	1401	1251.68	1186	1504.66	746	1193.2	653	605.442	335	973.291	618	2159.18	1897	765.668	350	723.667	340	2070.29	1575	1848.28	904	3234.96	2439	2863.57	2193	3227.55	2314	1081.87	825
1	4	HHL	AL	1388.7	1350	1162.29	1077	743.956	717	3887.19	3878	1565.89	1231	1254.85	1295	931.148	767	923.807	695	1702.66	1116	1215.03	1152	1450.1	1176	1213.05	1231	928.634	690	1110.2	922	1783.35	1692	585.318	438	1051.04	742	3543.62	3478	1389.28	868	3883.52	3935	2030.14	1844	2276.48	2021	932.831	1033
2	4	HHL	AL	1357.52	1524	1189.9	1051	943.324	751	3809.8	3871	1581.04	1304	1319.02	1263	948.126	737	908.318	707	1645.57	1187	1288.63	1173	1396.25	1146	1238.88	1219	728.217	597	1075.48	926	1676.4	1660	616.595	439	982.444	722	3575.34	3489	1183.74	922	4178.98	3865	1783.58	1959	2141.1	2156	968.507	1051
3	4	HHL	AL	1549.29	1528	1134.68	1028	942.275	861	3980.45	3943	1502.61	1262	1321.69	1241	899.871	717	933.765	719	1829.54	1367	1246.13	1209	1342.41	1113	1152.49	1092	725.069	602	1136.99	882	1726.31	1592	577.276	441	1160.57	708	3585.49	3429	1135.53	920	4479.63	3807	1691.94	1899	1938.93	2167	1012.58	1072
4	4	CALSEPA	17	3091.1	1871	2228.1	1124	2396.16	898	3430.4	3979	3253.82	1296	2480.7	1294	1920.45	730	2686.38	735	2767.88	1496	5406.46	1292	3389.51	1177	1821.11	1191	1460.34	569	1358.94	913	3233.03	1571	1463.42	456	1888.55	837	5402.39	3413	2932.76	933	9970.55	3936	4107.74	1969	4599.83	2183	3445.21	1111
5	4	CALSEPA	17	3614.85	1886	2086.11	1123	2370.13	906	3565.25	3586	2929.13	1208	2206.5	1250	1746.87	723	2885.55	770	3170.39	1490	5782.16	1222	3180.62	1112	1693.15	1110	1475.96	537	1292.82	865	3139.98	1513	1095.03	440	1894.41	802	6054.65	3222	2902.45	956	9277.87	3798	4175.66	1847	3918.77	2102	3407.46	1093
6	4	CALSEPA	17	3914.29	1810	2136.46	1085	2320.67	893	3331.22	3505	3132.06	1145	2192.64	1209	1787.5	748	2942.96	784	2712.11	1560	6242.97	1214	3110.65	1024	1785.61	1018	1331.49	511	1201.47	845	3091.47	1528	1501.28	443	1781.94	693	5282.36	2998	2897.6	949	9070.94	3698	4034.68	1745	4638.63	1975	3255.18	1077
7	4	AMA	18	1297.02	1623	708.289	869	691.945	865	3056.62	3529	1025.24	1105	1001.28	1103	696.096	796	771.011	756	1122.82	1518	2462.4	1202	821.156	939	531.762	892	495.707	502	715.146	804	1347.19	1452	572.893	422	473.219	641	1964.94	2674	1143.61	840	5254.89	3633	1494.48	1680	1180.48	1861	735.895	1055
8	4	AMA	18	1222.56	1526	578.981	979	687.857	834	2872.63	3314	981.481	1052	911.673	996	708.416	832	563.098	681	1080.08	1447	2300.97	1176	794.18	883	496.165	784	493.663	490	709.67	754	1276.34	1420	539.012	410	450.478	586	1872.52	2523	988.821	881	5205.49	3467	1794.46	1567	1246.59	1913	774.734	1053
9	4	AMA	18	1252.78	1514	780.207	923	674.57	810	2673.31	3100	942.93	1010	858.536	962	733.057	932	562.015	664	1061.6	1397	2314.22	1189	795.259	881	517.233	679	469.133	488	648.341	681	1275.3	1417	562.626	424	381.174	531	1750.07	2296	970.338	856	5194.65	3342	1669.29	1650	1309.06	2024	769.623	1068
10	4	MNA-M	19	5115.72	1567	4476.08	1136	3800.64	808	3526.14	2920	3865	1015	3094.08	1018	3641.68	1032	3019.75	668	4580.72	1363	7183.36	1233	4037.51	911	3411.68	766	1603.66	482	2615.39	646	6910.68	1438	4770.17	453	4824	499	5724.67	2144	5029.26	848	10057	3139	8225.77	1916	6787.1	2106	4566.15	1107
11	4	MNA-M	19	5012.09	1584	4576.48	1173	3544.38	789	3401.48	2753	4015.39	1105	2760.47	1084	3940.1	1062	3729.07	715	4926.59	1411	7342.76	1230	3855.37	870	3598.53	769	1949.69	458	2418.87	634	7430.1	1545	5276.12	456	4919.59	499	5754.01	2031	5369.02	831	9265.9	2977	8427.8	1987	6970.23	2168	4550.65	1084
12	4	MNA-M	19	4602.79	1637	4490.03	1210	3619.46	779	3537.4	3005	3778.58	1109	3125.19	1136	3896.94	1111	3219.62	751	4806.82	1495	8096.96	1244	3925.51	843	3497.2	763	1858.29	429	2774.68	640	6497.56	1630	4994.22	445	4945.66	511	5580.46	2040	5067.14	902	9574.36	2859	8671.7	2097	6363.2	2272	4431.5	1086
13	4	VFA	20	1702.22	1742	1265.88	1253	974.02	754	2778.46	3250	1816.03	1163	1319.61	1138	1214	1143	1087.08	782	2130.18	1590	3262.83	1279	990.934	799	856.14	758	673.938	396	1390.79	631	2025.2	1764	678.796	414	758.214	488	2427.57	1830	1711.12	909	6250.7	2669	2284.9	2220	3920.46	2324	1328.93	1075
14	4	VFA	20	1689.56	1733	1295.21	1254	938.13	720	2983.66	3488	1845.91	1210	1261.77	1131	1209.34	1128	1019.07	771	2165.1	1602	3232.28	1258	972.421	792	841.473	726	603.155	363	1320.31	626	2065.68	1837	644.297	394	713.553	445	1988.24	1864	1993.87	913	6330.14	2520	2558.69	2335	3992.87	2343	1321.96	1053
15	4	VFA	20	1828.89	1646	1262.21	1257	959.066	730	2982.62	3463	2052.19	1314	1208.76	1110	1206.54	1123	953.096	758	1984.86	1557	3276.27	1293	1006.52	784	835.974	714	578.231	345	1309.95	624	2161.11	1880	605.135	376	709.493	415	1954.44	1763	1742.67	911	6050.29	2481	2555.77	2366	3826.05	2322	1249.18	1030
1	5	VVA mannose	21	2380.77	1722	1883.12	1225	1535.16	794	4259.81	4376	2039.74	1240	1405.41	1361	1405.39	759	1920.7	784	2136.31	1484	3872.34	1348	1686.15	1283	1690.06	1294	1484.64	796	1614.66	992	1842.12	1640	792.114	462	1160.77	885	3475.71	3549	2025.24	945	7252.86	3929	3213.43	2015	3753.57	2392	1708.23	1101
2	5	VVA mannose	21	2419.11	1852	1841.97	1236	1701.68	897	3796.13	4095	2180.02	1286	1483.93	1358	1414.99	752	1752.64	797	2194.44	1535	3785.3	1270	1679.57	1282	1641.53	1291	1476.22	789	1586.7	975	1828	1599	817.413	460	1145.11	889	3398.21	3578	1959.36	921	7520.87	3993	3120.3	2013	3852.74	2338	1774.65	1104
3	5	VVA mannose	21	2319.41	1839	1757.58	1238	1741.9	928	3713.23	3979	2067.97	1206	1535.1	1344	1313.79	716	1668.09	786	2154.4	1557	3812.93	1276	1617.12	1233	1641.53	1299	1423.83	758	1629.12	964	1756.54	1559	803.455	457	1132.59	876	3355.59	3594	2100.15	912	7414.5	4045	2913.23	2014	3570.01	2247	1670.81	1108
4	5	ASA	22	1624.39	1835	1063.06	1219	773.579	939	3262.22	3839	1167.01	1272	4439.19	1289	681.643	708	752.841	755	1269.36	1604	10283.5	1284	6905.15	1163	1008.25	1243	1625.69	650	954.318	902	1660.68	1515	572.197	446	654.072	829	2379.79	3451	1132.68	860	6665	3887	1626.4	1885	5595.27	2157	932.614	1111
5	5	ASA	22	1580.1	1729	1000.41	1185	753.945	933	3151.83	3766	1055.42	1193	4463.77	1266	701.805	723	846.123	699	1192.01	1590	9787.43	1245	6239.89	1089	951.471	1167	1462.73	593	948.128	845	1560.43	1481	555.875	440	667.241	768	2307.74	3243	1221.68	825	6677.1	3729	1547.9	1787	5646.18	2017	950.284	1087
6	5	ASA	22	1461.34	1576	980.837	1148	741.183	924	3127.07	3670	1049.74	1155	4100.62	1205	688.364	759	738.574	739	1093.47	1551	10767.4	1255	6429.1	986	926.999	1094	1465.68	562	864.561	841	1497.07	1476	524.193	427	767.108	654	2334.23	3145	1243.93	933	6465.93	3605	1438.2	1649	5636.39	1920	898.254	1018
7	5	GSL II	BSL II	1273.64	1547	909.915	1002	625.943	897	2842.36	3546	1444.23	1109	1088.36	1129	712.703	817	2409.61	738	2626.06	1346	2925.62	1124	822.937	907	980.022	934	503.653	520	631.635	788	1509.73	1407	617.743	424	2131.58	662	3883.32	2020	1222.5	835	6667.16	3011	4089.23	1667	2268.52	1244	675.764	1054
8	5	GSL II	BSL II	1246.07	1535	927.626	941	599.673	869	2669.54	3360	1402.75	1006	1007.58	1030	720.7	875	1849.33	714	2836.08	1392	2515.36	1088	830.361	888	938.696	881	502.747	493	567.595	747	1361.26	1396	604.748	415	1267.99	501	2768	2706	1131.25	796	6158.55	3031	4163.47	1780	2745.98	1353	702.94	1051
9	5	GSL II	BSL II	1270.46	1567	929.102	996	597.861	856	2458.99	3162	1280.48	995	968.277	994	824.656	949	1749.63	689	2917.2	1364	3661.63	1012	856.873	916	962.311	856	539.887	481	538.645	707	1371.09	1366	632.736	424	2131.58	443	2518.87	2447	1076.2	793	4912.4	3162	4198.46	1836	2337.88	1522	737.362	1050
10	5	LEL	TL	13627.7	1620	7571.04	1081	1606.75	848	2426.4	2873	983.744	1013	747.107	1024	3658.3	1031	3178.8	677	6178.3	1375	11172.4	1154	7795.59	920	2060.78	808	1377.21	470	743.881	630	2165.34	1395	2342.33	434	1446.16	519	4985.45	2166	5619.92	797	12312.7	3015	4995.3	1849	2752.9	1974	3672.57	1044
11	5	LEL	TL	13817.3	1708	7410.8	1122	1564.8	827	4911.42	2430	1042.31	1088	790.636	1097	3755.89	1035	2624.48	687	6224.73	1486	11388.7	1174	7267.49	900	2129.77	855	1294.49	453	814.211	672	2223.91	1534	2412.73	430	1440.27	471	5058.96	2056	6571.62	794	11757.6	2831	4677.08	1892	2952.08	2065	3546.73	1043
12	5	LEL	TL	14201.9	1686	7533.2	1178	1541.5	786	2391.24	2687	1007.49	1113	789.053	1122	3723.09	1118	2763.79	707	5947.47	1495	11414.1	1222	7377.17	846	2165.38	833	1332.94	440	815.113	664	2279.31	1611	2344.73	424	1484.42	465	5046.06	2038	6348.52	857	11492	2745	4781.35	2042	2833.02	2149	3272.92	1030
13	5	STL	PL	4421.22	1683	7813.24	1252	1341.31	736	3570.12	3176	1602.6	1193	1171.92	1094	5325.74	1131	2317.93	733	4608.28	1599	9308.36	1251	4938.05	823	1800.67	794	1215.73	436	983.614	632	4254.08	1716	2756.03	397	1976.18	460	5100.03	1977	5416.07	908	11290.4	2541	4292.58	2100	3514.41	2276	1545.01	998
14	5	STL	PL	4332.08	1675	7979.12	1262	1359.91	698	3760.49	3489	1598.7	1246	1303.76	1067	5417.45	1135	2319.82	737	4618.55	1611	10756.7	1243	4978.67	820	1801.67	767	1253.87	404	996.744	618	4426.93	1787	2778.23	393	2139.99	414	4961.97	1971	4714.39	928	10463.4	2376	4202.31	2163	3606.34	2303	1563.62	982
15	5	STL	PL	4462.98	1709	7963.13	1269	1295.73	684	3828.33	3505	1646.55	1219	987.344	1097	5194.46	1108	1986.53	709	4262.57	1591	11007.7	1237	5406.35	808	1754.71	732	969.238	378	1065.67	604	4406.43	1813	2741.55	386	1831.19	402	4839.89	1794	5516.47	911	11273.7	2348	3801.71	2238	3638.32	2269	1566.41	980
1	6	UDA	26	1367.21	1644	1167.43	1276	615.973	809	3636.93	4115	1123.27	1223	1155.01	1260	672.522	669	739.687	764	1091.39	1597	2653.62	1223	988.241	1157	992.312	1335	586.101	767	790.115	968	1380.28	1531	453.904	478	590.432	895	2293.83	3509	911.924	922	5292.5	3669	1537.85	1831	2124.07	2346	765.331	1098
2	6	UDA	26	1387.1	1682	1196.61	1326	707.647	904	3529.84	3946	1186.75	1219	1145.8	1284	684.287	687	714.445	778	1127.29	1650	2674.66	1220	957.882	1164	1007.45	1307	698.377	822	865.52	987	1376.18	1494	583.31	456	593.725	897	2357.77	3513	925.384	924	5361.95	3691	1503.3	1817	2118.66	2309	752.97	1101
3	6	UDA	26	1365.11	1683	1177.15	1321	755.03	951	3412.9	3829	1049.54	1119	1129.41	1297	656.837	676	635.428	765	1118.31	1635	2761.99	1264	965.21	1137	977.178	1248	668.505	836	799.95	1006	1289.15	1468	533.312	473	578.36	880	2312.9	3484	924.262	903	5348.27	3718	1475.03	1814	2023.54	1880	733.399	1103
4	6	PWM	PWA	1249.2	1716	998.994	1259	753.055	985	3236.04	3781	1053.87	1200	1113.6	1314	601.63	733	622.365	763	1196.31	1654	2735.52	1323	910.553	1138	849.248	1193	616.136	792	760.357	965	1255.34	1458	474.653	464	627.843	862	2336.03	3424	1001.64	864	5535.47	3695	1443.59	1872	1858.5	2169	763.968	1132
5	6	PWM	PWA	1205.2	1637	955.917	1187	731.227	982	3124.37	3758	1048.81	1178	1087.28	1269	575.428	720	644.279	773	1237.05	1642	2714.77	1311	851.214	1061	806.17	1132	506.005	639	746.532	913	1252.3	1439	511.94	456	607.025	831	2233.03	3256	994.848	830	5332.35	3622	1391.41	1777	1773.37	2051	776.867	1117
6	6	PWM	PWA	1104.94	1544	901.556	1146	698.485	978	3120.12	3720	1028.57	1162	1030.59	1220	596.591	762	1390.46	624	1115.95	1615	2603.38	1242	805.175	990	745.656	1070	478.224	580	695.487	870	1216.87	1384	534.11	433	586.206	768	2167.39	3129	965.422	850	5298.5	3520	1220.55	1648	1823.63	1668	749.086	1100
7	6	WGA	28	2585.02	1612	2795.04	1094	1197.26	945	4240.29	3591	1584.21	1112	1456.28	1130	1669.84	836	1882.03	772	3501.68	1625	5582.61	1190	2145.68	947	1629.74	1020	1104.43	541	1325.43	815	2548.97	1366	1357.19	437	1242.83	725	4365.66	2883	3361.92	916	9984.44	3401	2862.38	1697	3794.32	1799	1621.96	1112
8	6	WGA	28	2818.01	1683	2879.1	1045	1246.35	926	4084.74	3436	1509.18	1060	1379.33	1045	1631.65	888	1847.68	727	3551.23	1617	5438.94	1144	2065.8	919	1430.09	936	1118.3	522	1380.2	784	2448.94	1327	1247.05	431	1182.71	697	4535.92	2832	3182.77	880	9940.03	3288	2952.25	1787	3749.14	1835	1676.38	1115
9	6	WGA	28	2646.04	1702	2456.69	1068	1179.12	900	3827.33	3131	1478.4	970	1378.37	1034	1668.07	956	1824.37	699	3623.65	1541	5356.65	1173	2178.96	950	1578.25	963	1086.29	485	1339.67	737	2484.53	1332	1270.15	438	1196.21	638	4156.02	2602	3051.9	851	9946.56	3129	3063.19	1844	3904.65	1968	1736.14	1120
10	6	DSL	29	4928.07	1646	2281.72	1088	1257.82	839	2874.97	2851	1216.56	956	987.148	1033	2247.6	999	1102.52	640	3239.41	1379	4456.84	1154	2933.23	960	964.011	957	835.907	457	740.349	708	2355.92	1342	1830.99	437	2597.54	532	2652.04	2500	4226.24	794	12883.7	2846	2515.9	1858	2191.57	1946	1400.34	1060
11	6	DSL	29	5160.58	1693	2605.37	1124	1257.82	828	4150.96	2408	1271.71	1037	1098.55	1098	2502.29	1022	1205.06	682	3570.32	1374	4061.4	1155	2885.54	921	1047.24	971	814.415	454	769.918	720	2554.45	1478	1950.9	425	2670.31	489	2484.22	2329	4349.15	810	12932	2694	2517.1	1858	2293.28	2061	1515.72	1024
12	6	DSL	29	4974.57	1644	2808.81	1161	1306.46	836	2831.75	2847	1279.43	1068	1129.43	1110	2570.56	1061	1198.44	725	3458.05	1442	3966.13	1174	2790.15	904	1072.66	948	781.612	429	759.682	683	2687.91	1578	1958.77	407	2734.26	471	2350.67	2223	4747.43	858	10357.1	2642	2467.02	1972	2388.07	1924	1447.85	1056
13	6	HPA	30	5879.3	1723	8106.41	1255	1806.6	825	7144.81	3176	9390.93	1134	6302.48	1080	5429.92	1056	1214.66	753	4394	1669	6112.71	1151	19749.9	860	8435.64	914	1235.02	398	3621.18	661	4642.12	1658	2378.6	407	1974.49	478	3568.37	2204	5361.81	919	8393.79	2523	7000.64	2063	9719.94	2259	2108.89	1049
14	6	HPA	30	6108.3	1756	8292.94	1266	1939.47	822	7036.91	3379	8853.03	1238	5974.63	1092	5256.52	1045	1194.94	746	4183.71	1699	8761.86	1154	15079.1	822	8398.95	872	1292.09	374	3368.44	641	5488.97	1718	2506.04	375	1924.53	425	3326.97	2081	5995.66	925	8257.75	2311	6638.48	2114	10057.3	2288	1947.49	1047
15	6	HPA	30	5982.6	1777	6963.79	1261	1445.46	789	7140.37	3387	9296.46	1202	5512.31	1048	5367.25	1056	1185.74	717	4382.9	1646	6598.19	1167	14229	811	7482.6	809	1255.53	356	3587.18	610	5218.91	1760	2379.64	347	1691.2	376	3261.07	1958	3822.35	891	8124.5	2246	6128.21	2151	9630.25	2243	1964.43	1023
1	7	VVL	VVA	1994.39	1677	1175.45	1284	657.026	803	4290.11	3985	1875.56	1197	1314.7	1204	686.7	682	890.599	722	3163.42	1630	2448.67	1124	1170.86	1170	1089.64	1268	720.318	783	867.161	926	1382.19	1456	748.279	520	1222.91	913	2428.12	3277	1703.72	893	5173.08	3475	1670.75	1840	2416.77	2095	811.739	1064
2	7	VVL	VVA	2003.66	1745	1428.91	1137	787.628	931	4289.07	3792	1921.19	1192	1246.26	1232	653.111	674	720.864	773	3082.81	1512	2468.29	1087	1164.68	1043	1058.71	1278	772.558	831	922.202	950	1298.54	1416	706.293	506	1228.02	914	2468.43	3350	1607.85	878	5551.07	3461	1598.6	1831	2393.82	1997	805.711	1079
3	7	VVL	VVA	1799.59	1557	1139.53	1207	940.331	920	4121.87	3632	1851.8	1150	1180.66	1303	745.48	670	797.551	699	3077.36	1570	2329.9	1055	1125.51	1175	1011.81	1274	837.859	911	910.778	949	1260.52	1356	711.891	488	1230.07	900	2523.98	3326	1620.93	861	5396.16	3451	1573.86	1839	2218.2	1993	812.743	1099
4	7	DBA	32	1255.7	1428	1518.5	1004	2098.57	980	3854.85	3562	1779.18	1156	1407.87	1251	527.674	648	942.146	694	3573.09	1568	2431.58	1213	1037.02	1054	874.615	1223	1408.58	857	1263.22	869	1344.06	1300	590.667	468	1209.91	735	2792.85	3250	1736.17	755	8133.28	3534	3527.04	1709	3158.63	2070	1770.36	940
5	7	DBA	32	1293.6	1406	1428.18	1058	2096.08	979	3789.66	3534	1789.64	1147	1333.6	1260	622.573	728	930.025	674	3657.06	1564	2350.44	1184	930.111	976	849.575	1144	1307.88	745	1332.1	818	1334.65	1285	579.214	442	1173.55	707	2652.05	3128	1308.58	797	7007.17	3415	3464.83	1628	4049.34	1859	1549.06	900
6	7	DBA	32	1210.99	1390	1319.97	973	2031.44	971	3767.52	3516	1728.98	1098	1302.22	1207	580.032	722	922.312	718	3483.96	1581	2403.11	1178	1053.54	903	809.332	1034	1090.31	595	1167.28	790	1339.88	1277	591.485	442	1098.62	657	2705.01	2958	1734.88	835	7439.96	3301	3402.63	1540	3443.91	1747	1542.85	900
7	7	SBA	33	4019.98	1686	1193.58	1058	1522.27	946	7744.72	3451	2523.78	1071	1651.95	1086	945.101	875	2830.61	734	2350.91	1584	3038.92	1015	1309.46	877	976.485	890	3236.16	593	960.576	774	6689.46	1282	856.16	454	754.536	725	2870.09	2502	1202.04	891	5764.08	3256	1497.33	1499	6566.37	1687	2368.57	996
8	7	SBA	33	4072.32	1697	1227.63	1013	1465.5	911	7513.4	3481	2547.65	1023	1415.78	1070	1144.59	929	2287.74	705	3061.92	1607	2022.29	1125	1335.63	852	977.336	864	3126.16	558	904.379	753	6615.35	1249	1000.79	438	948.654	614	2683.48	2402	1216.63	843	5405.11	3139	1610.42	1573	5686.94	1777	2389.86	1018
9	7	SBA	33	4650.88	1646	1297.44	1037	1596.79	899	7542.15	3201	2609.2	955	1560.25	1009	1256.81	959	2590.43	697	2674.09	1504	2534.71	1011	1260.86	898	1070.98	845	3058.74	513	853.41	721	6752.28	1226	1118	447	1593.52	593	2732.48	2378	1136.36	836	6312.12	3053	1672.11	1606	7236.37	1864	2824.54	1019
10	7	PTL I	WBA I	1561.98	1665	1225.07	1012	719.248	909	1969.73	2955	756.629	988	827.349	1026	723.977	1038	916.061	719	1515.23	1448	2411.61	1237	1007.84	1013	948.619	1046	448.738	465	479.39	716	993.123	1259	524.822	462	775.848	649	2862.26	2535	1103.28	813	5997.33	2909	1728.22	1856	2142.47	1970	836.861	1129
11	7	PTL I	WBA I	1617.39	1716	1164.87	1174	697.535	879	1741.38	2746	821.266	1087	759.671	1089	767.236	995	988.171	640	1549.44	1485	2389.42	1250	1036.7	985	966.454	1066	423.406	450	523.246	743	1020.5	1384	506.049	439	849.293	550	2743.95	2422	1140.34	796	5529.9	2815	1851.75	1935	2514.79	2040	829.623	1120
12	7	PTL I	WBA I	1630.09	1807	1637.51	1070	714.725	868	1755.75	2787	811.38	1072	804.536	1102	827.635	1004	811.903	671	1539.46	1514	2478.16	1257	1005.53	989	983.175	1027	417.073	436	544.417	758	1066.12	1480	496.255	423	958.793	535	2712.59	2395	1161.72	778	5285.89	2641	1821.73	1997	2353.15	2163	806.101	1081
13	7	WFA	WFL	1547.4	1603	1036.09	1256	1101.23	788	3431.05	3000	2210.7	1106	1372.77	1054	1562.04	1101	2745.37	763	3368.93	1475	2461.14	1241	723.436	891	643.042	961	1220.35	413	1396.72	735	2365.21	1593	1166.53	427	1203	536	3291.95	2181	2651.64	847	5305.9	2475	1793.93	2027	2248.91	2214	1597.57	1053
14	7	WFA	WFL	2419.83	1539	1006.89	1271	1085.34	776	3778.6	3250	2465.05	1281	1389.41	1062	1562.04	1139	2438.7	781	4467.47	1482	2482.29	1248	778.487	843	641.062	888	1283.88	377	1280.44	692	2453.16	1669	1147.64	389	1278.54	460	2924.14	2061	3045.11	870	4913.81	2232	1863.94	2093	2068.23	2237	1588.31	1037
15	7	WFA	WFL	1432.51	1632	1033.12	1269	1032.4	752	3842.62	3293	2227.34	1140	1327.61	1040	1564.26	1159	2261.68	772	2913.14	1467	2623.33	1202	971.164	840	635.616	840	1240.2	342	1360.14	652	2518.53	1674	1165.42	366	1080.11	408	2393.81	1850	6776.96	860	5280.51	2115	1883.09	2147	1749.93	2228	1478.45	985
1	8	CSA	36	1661.2	1861	2527.32	1193	1071.68	886	3562.8	3890	2146.12	1189	1329.43	1233	905.859	653	2793.86	826	7717.94	1634	5176.36	1239	2404.62	1236	1419.49	1255	1466.91	821	1150.98	915	1430.43	1481	1038.52	548	6105.89	950	6499.92	2364	2538.97	885	18365.8	3550	1909.81	1784	4191.06	2185	1345.3	1120
2	8	CSA	36	1762.91	1712	926.235	1237	1240.41	984	3511.53	3768	2215.07	1230	1412.95	1293	938.019	662	2849.09	814	6730.56	1666	4107.33	1233	3527.43	1179	1367.94	1233	1722.29	892	1073.55	985	1351.77	1420	1005.02	548	8150.94	950	5405.8	2591	2409.35	882	18318.9	3545	1691.87	1777	4631.18	2082	1751.17	1013
3	8	CSA	36	1682.99	1625	919.098	1239	1202.41	991	3403.76	3664	2018.91	1215	1336.23	1303	942.04	657	2493.36	797	6345.52	1682	4416.79	1157	3864.03	1192	1356.05	1200	1907.74	1000	1077.73	961	1247.86	1362	1031.82	526	7863.43	919	5182.78	2931	3095.56	831	17990.7	3550	1681.38	1767	3987.25	2077	1714.69	997
4	8	Black bean crude	37	17491.3	1614	14814.7	1210	11142	1001	13543.2	3581	10534.7	1167	10503.3	1337	6586.05	714	17474.2	813	14553.6	1660	15066.1	1409	6340.85	1184	9935.04	1228	9377.65	978	11814.5	957	8781.57	1313	11174.5	512	7996.81	912	9552.65	3227	9576.48	839	25830.4	3549	19356.5	1719	24344.8	2030	11970.7	1145
5	8	Black bean crude	37	16660.9	1674	16591.1	1169	10856.7	998	13528.2	3507	10273.5	1120	10961.7	1354	6774.89	777	16930.6	789	14801.4	1622	15695	1326	6184.09	1109	10392.5	1167	9309.12	889	11363.2	938	8121.64	1239	10911.2	500	8191.03	859	9533.58	3072	8432.59	881	25295.1	3477	18798.8	1673	23814.6	1918	10982.5	1115
6	8	Black bean crude	37	15975.9	1698	16292.1	1136	10622.4	1003	13114.1	3490	9950.35	1091	9822.35	1216	7059.02	870	17094.6	777	14127	1616	15848.3	1261	6587.35	1042	10426.8	1097	7496.14	729	11254.9	896	8469.96	1207	10919.9	492	7353.64	826	9192.8	2923	9608.65	927	28957.7	3415	19549.6	1583	24437.7	1791	11006.2	1121
7	8	GSL-IA4	38	1841.97	1700	897.402	1091	727.207	994	3841.13	3394	1770.16	1041	1140.63	1138	1306.93	972	1053.5	725	6100.21	1612	3085.34	1261	1578.55	1004	639.623	1028	767.912	674	1213.91	848	1334.96	1193	1111.26	491	5968.9	795	3769.72	2573	3486.06	900	15593.1	3356	2504.01	1668	1533.58	1703	969.87	1129
8	8	GSL-IA4	38	2019.91	1763	847.776	1053	706.855	973	3722	3192	1615.31	950	1110.27	1101	1499.78	1041	1074.21	677	6022.85	1588	3041.08	1242	2923.5	975	578.28	930	754.605	611	1216.42	803	1321.8	1173	1174.92	488	4444.57	722	3668.18	2679	3195.96	872	10128.7	3248	2611.37	1737	1521.17	1757	1000.4	1137
9	8	GSL-IA4	38	2239.59	1751	873.278	1087	726.424	957	3314.43	2955	1701.34	929	1412.89	1100	1624.3	1076	1060.4	756	6237.2	1508	3189.77	1227	3200.84	1013	652.03	966	755.387	570	1136.16	755	1311.68	1182	1299.44	491	5625.1	716	3771.33	2325	3291.05	833	10868.6	3127	2506	1770	1776.19	1830	1101.38	1122
10	8	IRA	39	2830.44	1760	3989.15	1104	1399.83	885	3780.64	2634	1932.57	970	2944.18	1107	2523.38	1085	1220.73	736	4716.82	1465	4678.66	1180	2183.13	1038	2377.52	1003	1153.64	522	1623.06	722	3006.85	1221	2116.66	481	1502.84	692	2798.78	2335	4754.39	736	7331.77	2918	8407.14	1763	3979.7	1896	4278.68	1090
11	8	IRA	39	3017.01	1778	4388.38	1121	2837.83	838	3721.01	2516	2104.9	1037	2958.73	1136	2414.08	1108	1180.32	770	4373.49	1502	4666.3	1191	2637.04	1047	2494.14	1108	1011.46	486	1888.69	733	2971.04	1309	1970.57	466	1478.45	673	2913.57	2483	4647.94	741	6962.79	2721	3526.68	1829	4105.77	1980	4320.67	1101
12	8	IRA	39	3385.61	1824	4136.24	1169	2377.9	849	3271.06	2496	2102.67	1064	2899.42	1111	2157.65	1148	1280.2	792	4628.12	1529	4638.52	1200	3166.04	1003	2411.14	1076	775.774	444	2257.32	751	2947.54	1392	1719.39	437	1444.13	620	2711.13	2337	4206.53	801	7031.49	2633	2769.01	1888	4177.21	2069	4013.41	1082
13	8	IAA	40	2711.27	1919	2328.39	1253	1140.98	871	4458.16	2839	1702.95	1119	1912.95	1128	3707.38	1223	1731.76	819	1782.19	1594	3389.39	1249	3266.77	992	1559.39	1046	1949.46	409	1430.28	785	1920.26	1519	1231.53	412	1209.17	575	1398.44	2059	2718.55	838	5991.08	2567	3462.01	1990	4244.56	2174	3376.42	1063
14	8	IAA	40	2957.64	1911	2400.33	1278	1042.02	855	4766.45	3152	1979.81	1235	1881.61	1112	3985.43	1230	1759.29	831	1897.17	1572	3368.84	1262	3724.65	955	1416.48	960	1857.43	384	1370.68	719	2020.56	1631	1458.45	392	1204.27	528	1263.34	2080	2851.5	855	6467.13	2347	3500.36	2057	5025.23	2178	3509.03	1047
15	8	IAA	40	2647.35	1927	2649.21	1257	1079.62	824	4848.97	3188	1794.89	1160	2005.93	1056	3887.42	1233	1617.33	822	1800.87	1533	3686.21	1217	3744.41	952	1321.2	889	1784.2	344	1315.67	637	1876.38	1571	1444.6	383	1153.48	464	1191.48	1909	2512.31	842	6105.24	2251	3753.7	2078	4610.11	2172	3295.28	1056
1	9	HMA	41	1930.72	1532	1116.02	1298	911.151	886	3433.05	3769	1024.97	1168	1219.93	1281	655.054	643	891.74	850	1426.04	1400	1745.3	1302	1355.89	1206	1004.12	1083	782.349	879	934.345	1017	1316.42	1400	671.076	568	1171.72	989	2538.13	2969	1117.62	907	4174.54	3500	1548.96	1709	2176.59	2109	1110.55	1184
2	9	HMA	41	1503.99	1589	1182.37	1267	1060.94	947	3528.26	3629	1111.62	1124	1237.65	1359	639.973	650	866.388	865	1495.68	1552	1875.1	1355	1302.14	1213	951.639	1207	842.457	868	980.617	1003	1191.37	1385	683.329	575	998.661	973	2404.37	2978	1207.16	896	4336.29	3612	1611.49	1717	2196.4	2109	1122.96	1206
3	9	HMA	41	1532.51	1642	1157.61	1134	891.115	1061	3191.01	3547	1105.71	1154	1215	1301	757.789	688	852.059	855	1473.57	1560	1733.32	1380	1226.44	1160	1281.4	1043	918.784	942	874.725	1008	1203.19	1316	688.984	565	1135.34	975	2420.95	2528	1083.35	865	4343.28	3560	1692.67	1694	2071.62	2086	1186.88	1218
4	9	GHA	42	3792.35	1760	6117.07	1192	1479.37	1039	3917.5	3524	2210.75	1180	1629.7	1365	2130.69	784	4343.98	835	11466.2	1626	4956.22	1339	5751.94	1144	5856.63	1208	1659.7	951	2528.23	959	2102.72	1343	1735.92	540	6901.05	937	7861.94	3145	5087.6	854	24825.3	3505	2082.85	1654	5452.44	2021	1713.06	1172
5	9	GHA	42	3927.22	1772	6088.13	1211	1465.57	1030	3892.37	3482	2224.64	1118	1596.52	1336	2197.37	876	3797.73	817	14240.6	1622	5334.72	1269	5042.77	1095	4971.7	1148	1672.58	945	2419.66	955	1729.24	1265	1751.83	541	6807.18	904	7565.67	2962	6149.07	854	22112.7	3439	2457.97	1603	5006.23	1895	1804.14	1132
6	9	GHA	42	3873.63	1647	5774.49	1169	1531.81	1032	3812.95	3416	2054.1	1047	1574.14	1238	2308	965	3948.14	856	12839.7	1614	5250.61	1214	5049.03	1081	3174.75	1109	1410.37	819	2192.47	882	1730.79	1180	1802.6	525	6616.05	836	7528.39	2754	5556.53	865	21229.5	3412	1972.09	1531	4970.76	1780	1893.38	1130
7	9	MNA-G	43	1973.68	1590	1968.09	1101	1179.08	990	2737.46	3337	1141.36	965	996.869	1140	1324.61	1014	1093.96	778	8243.4	1585	4660.38	1223	1864.69	977	1210.59	1028	907.509	700	1235.45	814	2087.88	1095	1201.05	513	4842.4	775	4401	2595	9459.35	879	9753.81	3348	2753.87	1631	3000.65	1625	1487.77	1087
8	9	MNA-G	43	2096.7	1580	1904	1035	1155.63	985	2726.12	3201	1165.45	967	1042.11	1172	1401.91	1071	1038.57	784	7762.92	1512	4663.56	1222	1698.51	948	1184.77	968	931.93	664	1176.84	765	2020.74	1065	1148.59	524	5093.79	728	3889.56	2450	8463.01	855	8583.16	3221	2856.39	1682	3087.88	1656	1450.65	1064
9	9	MNA-G	43	2167.92	1701	1941.39	986	1165.4	969	2471.85	2995	1231.13	1012	1083.71	1173	1326.68	1090	1095.03	745	7509.41	1473	4614.38	1234	1639.16	968	1232.84	1009	840.105	596	1165.5	722	2156.48	1117	1193.46	518	4520.71	724	3941.15	2499	8915.49	810	8402.33	3068	2875.81	1734	3186.69	1757	1357.84	1110
10	9	RCA I	RCA120	4330.84	1789	3067.25	1117	3390.8	948	5288	2770	3707.59	1084	2890.05	1211	3123.37	1159	5467.22	791	6128.11	1491	6586.15	1264	1872.49	1017	1923.88	1027	2706.02	544	2684.18	742	3300.44	1229	3367.96	530	3347.63	756	3960.14	2640	3628.56	803	10188.4	2932	3958.98	1759	5117.12	1919	4541.44	1144
11	9	RCA I	RCA120	4085.8	1808	3285.84	1139	3126.06	902	5128.58	2612	4057.34	1127	2552.21	1228	3087.77	1194	5388.99	814	5864.49	1532	6791.26	1246	1821.63	1033	1997.59	1112	2735.3	512	2813.78	770	3215.98	1307	3130.26	515	3863.06	735	4807.52	2641	3986.34	841	9502.68	2724	3881.7	1787	5268.31	2003	4367.06	1133
12	9	RCA I	RCA120	4203.36	1850	3127.73	1176	2852.4	880	5407.23	2633	4130.97	1148	2634.51	1229	3211.79	1255	5182.18	846	5395.36	1561	6452.9	1247	2042.9	1018	2157.6	1208	2814.21	469	2795.64	787	3338.34	1363	3364.51	476	3720.54	700	4307.28	2533	4022.37	856	10088.1	2568	4120.8	1883	5153.66	2091	4255.05	1124
13	9	GSL I-B4	BSL I-B4	1294.41	1769	1006.4	1202	823.504	823	2842.49	2693	1684.35	1164	1209.75	1181	1064.3	1201	622.385	843	2022.37	1562	2612.84	958	893.302	996	885.853	1108	636.813	436	939.025	764	1369.75	1435	687.548	419	1045.75	634	1534.42	2246	1124.02	818	4481.9	2440	1642.17	1911	2107.17	1928	1019.36	1033
14	9	GSL I-B4	BSL I-B4	1324.77	1834	1029.76	1221	847.556	823	3217.61	2958	1693	1206	1182.72	1149	1066.3	1238	658.57	865	2115.6	1569	2772.4	922	829.823	953	873.705	1017	545.185	375	883.361	717	1477.86	1506	643.577	394	991.473	587	1408.95	2094	1208.54	849	4264.77	2314	1649.53	1931	2153.89	1961	998.742	1019
15	9	GSL I-B4	BSL I-B4	1274.17	1799	1062.46	1221	808.615	815	3297.48	3000	1714.62	1200	1138.4	1118	1132.26	1227	656.76	858	2169.63	1532	2598.45	950	908.942	956	826.049	952	479.9	358	959.596	610	1497.32	1502	655.569	389	939.005	506	1349.7	1925	1543.14	827	4612.67	2127	1665.17	1920	2233.32	2073	990.725	1027
1	10	EEL	46	1929.19	1637	3291.25	1278	1554.92	962	4410.92	3859	1683.15	1224	1647.4	1322	1689.88	641	2303.19	890	3799.85	1667	3662.91	1263	1228.62	1138	1741.45	1253	1317.21	853	1426.96	990	2657.71	1507	1546.04	554	1320.78	961	3515.07	3220	2297.31	850	7155.31	3151	2060.48	1742	3152.73	2030	1705.2	1109
2	10	EEL	46	1906.18	1574	2613.21	1238	1664.93	1046	4320.24	3726	1734.66	1210	1690.5	1329	1713.37	659	2297.55	865	3410.21	1608	2817.62	1213	1369.5	1140	1628.96	1249	1422.31	918	1361.34	972	2483.19	1498	1574.42	554	1295.97	941	3789.12	2938	3498.39	863	7172.24	3317	2024.06	1705	3336.04	2038	1715.03	1126
3	10	EEL	46	1841.97	1573	2622.59	1276	1699.31	1037	4113.83	3576	1714.68	1199	1707.33	1309	1742.72	721	2300.93	855	2694.09	1567	2763.2	1234	1268.87	1140	1587.3	1230	1352.57	912	1407.87	968	2289.75	1427	1533.32	548	1271.15	922	3608.01	3322	1829.03	844	7348.79	3337	1980.94	1691	3155.85	1988	1926.21	1136
4	10	PNA	47	3059.52	1713	951.988	1106	2090.17	1047	5302.2	3440	2395.13	1167	2157.94	1292	665.796	813	1030.8	817	4082.46	1595	3264.29	1203	1721.49	1062	1050.42	1162	4406.81	907	3098.43	930	2080.59	1365	499.69	552	674.242	916	7547.05	3190	2581.46	844	15206.3	3260	1113.77	1646	2075.53	1872	3282.77	1134
5	10	PNA	47	2560.19	1681	989.955	1104	2169.12	1053	5430.48	3381	2342.28	1066	1874.34	1240	667.855	922	993.819	799	3859.25	1565	3283.52	1179	1142.18	1018	993.471	1154	4496.15	870	2899.44	943	1775.08	1224	548.424	545	618.292	878	7029.46	2954	2520	840	16268	3094	1038.28	1586	2252.01	1690	3276.54	1115
6	10	PNA	47	2800.88	1604	783.949	1155	2137.96	1039	5218.33	3302	2223.68	986	1785.39	1148	679.524	979	811.745	816	3668.39	1516	3119.02	1167	1210.95	959	923.865	1098	4113.85	806	2601.76	898	1659.06	1159	515.477	541	569.928	826	6573.34	2731	2497.35	849	16975.2	2991	1010.62	1461	2039.67	1675	3286.92	1105
7	10	BPL	48	3009.16	1570	2140.32	1110	967.99	1034	4045.64	3243	1960.93	940	1920.02	1183	1384.65	1007	2832.35	735	4049.89	1451	6696.3	1165	4820.41	979	1438.08	1047	882.357	730	2223.61	824	1463.32	1056	1067.42	523	4932.98	769	3550.8	2394	3790.81	828	15695.7	3134	2101.9	1461	3654.72	1688	3846.77	1103
8	10	BPL	48	3031.33	1603	1740.6	1020	922.655	946	3809.57	3079	2093.18	985	2150.27	1228	1691.36	1026	1404.02	723	4369.53	1434	5223.48	1144	4575.73	915	1167.36	969	871.443	684	1850.52	766	2692.59	1043	1328.81	525	5671.45	730	3587.81	2352	3127.98	797	15796.8	3054	2494.36	1533	4500.49	1604	3602.47	1083
9	10	BPL	48	3142.17	1620	1777.85	1009	1004.09	944	3482.61	2923	2101.74	1058	2457.58	1252	1779.57	1095	1239.32	752	4371.77	1436	6382.24	1137	3835.96	908	1050.17	974	983.941	623	1440.8	726	2807.71	1152	1400.03	529	5722.75	710	3852.5	2561	3302.94	774	16136.1	2935	2317.83	1610	4192.52	1682	3490.81	1079
10	10	ABA	49	2610.03	1711	1435.02	1078	1355.44	952	3261.36	2738	1838.91	1144	1595.42	1297	2263.04	1191	1114.41	795	2791.78	1490	2628.37	1188	3460.61	986	2083.34	1054	1822.24	592	2620.68	756	4067.42	1278	2651.22	541	1051.14	741	2376.03	2758	3489.21	832	5088.52	2869	2048.88	1688	3655.83	1774	4438.91	1109
11	10	ABA	49	2636.06	1746	1440.6	1130	1254.8	898	3103	2593	1960.66	1177	1650.47	1302	2492.07	1215	1047.81	817	2857.26	1546	2549.21	1198	4084.23	1027	2244.03	1097	1741.94	537	2695.2	799	4382.9	1360	2423.17	535	1074.45	738	2448.78	2755	3158.68	843	4853.51	2685	1897.92	1706	3799.8	1869	4338.26	1118
12	10	ABA	49	2833.87	1832	1503.76	1160	1390.77	891	3149.58	2529	1991.36	1194	1601.77	1313	2453.25	1245	1082.22	849	2727.34	1593	2688.97	1216	4361.16	1009	2241.24	1149	1512.83	494	2884.61	835	4560.76	1443	2563.88	502	1071.12	716	2425.92	2613	3386.31	861	5240.66	2529	2139.46	1787	3804.44	1986	4435.69	1122
13	10	Jacalin，AIA	50	4091.62	1697	1452.51	1119	879.968	852	2543.79	2502	1199.81	1229	1130.45	1217	1468.19	1221	815.947	779	5396.58	1538	2771.01	1137	975.841	883	895.256	1162	679.117	420	929.363	782	3050.77	1549	1305.72	437	3305.07	630	4470.89	2255	1724.77	797	6386.09	2387	3633.47	1771	1940.33	2008	862.213	1019
14	10	Jacalin，AIA	50	4367.27	1752	1590.45	1137	844.458	826	2878.68	2530	1225.69	1271	1187.39	1207	1629.8	1229	766.03	877	5405.02	1592	2836.26	1055	1086.3	915	840.444	1097	623.634	387	912.058	758	3124.27	1587	1360.45	414	3128.44	610	4026.33	2053	2612.47	830	6834.5	2217	3755.45	1780	1996.97	1944	857.774	1028
15	10	Jacalin，AIA	50	5762.84	1716	1637.04	1131	848.897	814	2843.06	2791	1291.94	1301	1147.01	1165	1601.59	1249	695.955	887	4880.27	1539	2547.49	1001	1874.85	917	798.422	987	648.047	351	815.356	683	3272.3	1618	1363.87	401	2563.03	542	3284.94	1859	3099.23	822	5694.72	2035	5523.69	1746	2837.41	2040	862.213	1043
1	11	ACL	ACA	2182.37	1692	1753.22	1333	993.489	1035	4934.36	3963	1278.69	1265	2822.54	1413	3195.94	717	1065.22	948	1791.16	1686	3002.61	1267	1265.05	1215	1347.76	1265	1090.23	874	1073.09	1045	3154.54	1542	1009.6	569	927.078	918	2562.89	3324	2343.87	908	5038.9	3096	2068.87	1865	3123.63	2299	1197.91	1169
2	11	ACL	ACA	1963.62	1707	1839.3	1339	1119.67	1121	4778.76	3711	1341.14	1275	2768.85	1442	3084.51	715	1051.6	935	1928.76	1742	2615.9	1242	1332.12	1158	1572.01	1320	1158.37	927	1071.94	1030	2895.95	1524	999.993	574	1069.11	846	2609.91	3369	2076.69	914	5182.23	3188	2058.55	1862	3068.14	2275	1161.73	1126
3	11	ACL	ACA	2096.73	1826	1757.75	1342	1115.47	1101	4732.66	3608	1252.39	1230	2833.5	1440	3036.48	797	1047.71	915	1866.84	1516	2286.89	1268	1572.54	1152	1619.58	1313	1160.89	928	1084.61	1024	2746.93	1459	962.529	580	940.697	875	2692.47	3394	2119.11	897	5339.07	3178	1972.9	1814	2903.91	2228	1163.42	1147
4	11	MPL	52	1406.3	1706	1116.88	1284	1011.22	1099	3548.23	3486	1117.38	1166	1237.06	1374	888.871	930	1117.92	899	2366.16	1530	2043.14	1194	1002.32	1147	1058.71	1286	935.412	900	1066.24	984	1752.93	1408	562.709	574	2319.07	894	2550.1	3225	1114.51	800	5613.28	3170	1994.46	1515	2147.48	2047	990.23	1120
5	11	MPL	52	1393.07	1649	1205.11	1098	1033.39	1047	3501	3442	1046.19	1083	1165.87	1283	963.952	1023	1120.41	882	2254.06	1513	2078	1148	1022.67	1098	1017.02	1240	894.59	877	1009.56	949	1526.98	1212	578.048	540	2423.13	827	2436.91	2988	1118.87	807	5523.45	3120	2208.15	1475	2051.49	1928	985.565	1104
6	11	MPL	52	1363.56	1672	1213.83	1179	1024.05	1043	3375.84	3369	985.314	899	1141.11	1068	1008.36	1026	1054.65	793	2126.72	1438	2177.21	1141	980.949	1067	1025.75	1188	830.44	822	926.909	905	1412.46	1146	519.113	543	2370.68	786	2193.11	2759	1080.77	809	5693.72	3072	1788.91	1507	1936.12	1915	1013.56	1109
7	11	PHA-L	53	10880.5	1719	11282.6	1170	17704.4	1059	18544.8	3346	8436.12	977	7640.15	1274	6647.04	1112	15252.7	740	9701.38	1419	14931	1208	3669.79	1022	9136.81	1124	5716.7	796	11102.1	832	7990.13	1087	11598.4	551	6968.03	812	5213.45	2558	3348.14	855	22803.9	3036	19250.7	1470	23821.9	1833	4819.2	1142
8	11	PHA-L	53	11265.9	1708	12003	1057	17570.9	1048	18346	3184	8070.34	1048	7549.01	1328	6314.76	1131	14698.5	688	9656.45	1484	14640.9	1217	3494.72	975	9082.13	1062	5492.69	737	10994.1	797	7704.56	1109	11783.7	554	6835.07	743	4962.48	2384	3208.95	827	20940.6	3018	19668	1592	23633.9	1733	4891	1136
9	11	PHA-L	53	11197.6	1691	11297	1081	17513.4	1004	17314	2947	8293.94	1135	7508.9	1325	6602.31	1140	15329.2	749	9598.36	1508	14248.3	1177	3298.74	919	9188.61	1028	5768.4	660	10937.7	761	8038.74	1249	11494.5	557	7122.17	718	5179.48	2730	3139.91	802	22726.9	2880	19619.5	1576	23526.4	1719	4804.84	1100
10	11	PHA-E	54	11800.8	1679	8586.97	1100	10405.7	943	14955.9	2677	6912.29	1162	4870.95	1316	5709.91	1140	11502.8	805	7935.73	1534	12096	1167	3069.12	914	7328.52	1058	6273.36	576	9666.61	762	6927.47	1342	10816.1	553	5000.86	757	5254.69	2708	3679.91	792	19569.3	2694	15045.9	1561	17054.1	1738	5835.17	1089
11	11	PHA-E	54	10230	1674	8565.76	1118	10884.1	908	15027.1	2559	7194.96	1192	4792.22	1324	5826.74	1156	11739.1	851	7902.11	1556	12972.4	1163	3433.41	950	7346.96	1129	6704.62	542	9443.04	804	7157.97	1406	10577.3	554	4527.02	710	5254.69	2783	3622.43	808	17808.3	2531	14826.5	1625	18091.3	1770	6202.64	1074
12	11	PHA-E	54	10585.4	1685	8157.34	1114	10455.6	855	15107.1	2569	6974.89	1214	4852.93	1327	5778.13	1184	11713	877	7954.17	1594	13273.7	1159	3521.42	919	6972.65	1103	6633.9	490	10009.6	829	7261.36	1503	10665.2	518	4626.78	728	5116.96	2675	3721.13	827	16385.7	2394	15488.2	1656	18357.7	1839	5818.53	1067
13	11	ECL	55	1876.87	1622	2092.4	1168	1479.71	825	3909.26	2594	3046.9	1294	2259.33	1329	1722.49	1233	1455.13	882	1519.26	1515	1909.1	1105	1227.22	916	1769.35	1115	1084.78	441	1675.4	810	2965.28	1650	1079.6	474	767.888	652	1959.94	2447	1233.73	817	4378.62	2225	3331.62	1632	3017.69	1925	1790.01	1009
14	11	ECL	55	1892.31	1604	2040.12	1153	1460.48	822	4093.21	2699	3203.32	1330	2305.58	1366	1858.58	1268	1393.31	897	1555.58	1533	1971.23	1135	1265.31	895	1780.55	1106	1037.34	405	1594.67	803	2968	1717	1009.53	435	812.689	615	1943.44	1902	1330.28	852	5181.49	2023	3305.88	1679	3128.8	2017	1788.73	1045
15	11	ECL	55	1864.51	1476	2130.69	1148	1439.96	812	4058.81	2706	3174.76	1331	2247.09	1314	1796.63	1296	1459.61	895	1541.55	1480	1970.02	1084	1376.51	912	1604.08	1000	995.022	355	1468.95	737	3048.26	1759	1004.45	410	792.081	544	1867.52	1854	1473.05	834	4413.95	1932	3307.94	1655	3434.12	2029	1847.71	1068
1	12	MAL I	56	1452.43	1690	1234.14	1429	935.979	1094	3877.56	3991	1476.88	1293	1251.51	1481	746.645	717	782.884	1006	2252.75	1664	1788.23	1092	1190.1	1290	1130.41	1357	828.765	933	1020.18	1063	1601.51	1590	655.758	535	791.414	1018	2640.35	3428	993.893	894	4451.94	3080	1874.72	1945	2366.67	2444	901.671	1173
2	12	MAL I	56	1428.97	1740	1197.1	1417	1063.56	1185	3737.75	3825	1593.2	1282	1267.08	1473	748.6	793	817.005	1017	2160.19	1659	1699.75	1155	1157.04	1260	1137.82	1357	862.001	966	1004.89	1049	1602.55	1586	567.802	593	800.892	1012	2631.1	3434	1108.44	776	4590.48	2896	1775.55	1925	2304.22	2385	937.051	1188
3	12	MAL I	56	1448.16	1782	1174.87	1356	1024.97	1158	3517.11	3685	1450.92	1176	1317.98	1461	834.601	893	787.623	979	2059.52	1635	1697.42	1013	1118.65	1245	1144.17	1343	879.156	977	1022.36	1053	1513.23	1509	556.075	607	782.884	1002	2635.73	3380	982.323	853	5072.46	2649	1757.42	1868	2584.71	1958	944.556	1204
4	12	CY3	68	1613.11	1739	1438.31	1372	1120.23	1189	3336.31	3662	1181.31	1238	1333.06	1460	904.333	1087	1007.87	980	2194.61	1708	1962.59	1288	1179.83	1245	1257.97	1361	1012.12	988	1192.53	1080	1364.67	1408	669.949	634	1010.24	1002	2390.94	3409	1326.35	854	4914.76	3012	1805.3	1890	2793.64	2269	1494.34	1198
5	12	CY3	68	1625.33	1770	1425.03	1321	1063	1187	3294.48	3591	990.574	1084	1266.67	1395	996.133	1161	955.508	920	2130.34	1562	1940.1	1211	1106.51	1190	1224.78	1292	999.406	962	1109.96	1030	1294.07	1276	649.44	627	968.598	952	2208.64	3132	1271.43	855	4919.49	2989	1787.53	1865	2667.51	2216	1258	1225
6	12	CY3	68	1623.1	1807	1402.91	1307	1070.41	1120	3281.62	3532	935.776	989	1236.11	1299	1018.6	1197	900.772	856	2006.47	1508	1863.16	1194	1046.52	1129	1152.86	1245	957.014	900	1062.77	961	1166.56	1181	674.832	616	953.129	914	1977.26	2890	1288.96	841	4985.78	2998	1654.21	1790	2561.3	2121	1300.39	1206
7	12	CY5	69	7128.66	2110	7887.59	1332	2788.72	1108	6353.37	3372	3847.67	1062	4105.03	1381	2989.54	1185	9493.87	834	9816.97	1617	8938.59	1507	5751.84	1258	6421.04	1250	2559.05	856	2785.17	885	4327.04	1135	1972.08	614	7561.32	928	9893.92	2784	10483.1	1063	13600.7	3428	7075.44	1904	9390.38	2163	3379.7	1183
8	12	CY5	69	8171.46	2144	7452.64	1252	2731.77	1097	5955.49	3229	3991.91	1159	3996.15	1413	3001.7	1189	8789.95	791	9985.3	1672	8878.51	1530	5752.97	1190	7382.94	1201	2471.29	821	2706.51	838	4386.43	1206	1953.84	597	7526.51	862	9827.79	2832	11191.2	951	13054.4	3221	5604.65	1709	10353.7	2053	3418.91	1171
9	12	CY5	69	6717.65	2132	7006.54	1231	2680.42	1062	5792.4	3029	3945.24	1241	3959.38	1440	2955.08	1224	9860.01	872	9511.58	1743	9252.93	1531	5113.25	1049	5901.05	1125	2441.41	760	2616.3	812	4691.87	1360	2005.53	589	7970	854	9539.24	3058	8999.39	974	11662.9	3123	6290.79	1808	9065.57	1964	3358.23	1151
10	12	printing buffer`1	70	1354.82	1659	945.424	1111	786.605	901	2372.41	2643	1051.9	1177	1113.83	1296	932.657	1111	636.953	777	1011.62	1443	871.116	1136	748.446	891	872.418	1023	520.11	602	624.744	734	1266.21	1355	454.095	548	524.984	723	1971.15	2715	670.942	809	2279.91	2603	1327.03	1536	1578.14	1776	775.708	1010
11	12	printing buffer`1	70	1241.58	1568	1016	1131	769.764	881	2283.3	2528	1095.15	1191	1114.81	1334	929.721	1127	672.867	798	1035.58	1436	884.662	1095	788.597	897	963.675	1107	478.502	545	708.785	783	1334.04	1431	487.37	543	521.816	706	2147.22	2703	646.98	783	2185.08	2432	1341.44	1537	1676.7	1817	773.726	989
12	12	printing buffer`1	70	1310.55	1629	1019.65	1153	731.127	853	2306.59	2546	1134.48	1223	1213.12	1345	975.718	1185	696.106	822	1060.59	1453	879.452	1115	816.393	911	1008.7	1112	459.679	480	731.061	808	1400.89	1568	469.754	525	535.548	694	2102.42	2593	676.152	793	2088.18	2350	1361	1555	1691.3	1870	757.875	978
13	12	printing buffer`8	71	1314.81	1702	993.749	1205	712.792	889	2473.54	2800	1180.86	1337	1283.24	1449	1047.48	1249	748.995	936	1095.46	1655	890.613	1135	746.96	915	929.177	1135	430.098	461	773.832	872	1636.99	1771	458.151	493	583.279	740	2054.89	2591	675.897	857	2035.84	2253	1371.8	1684	1572.71	1942	739.042	1060
14	12	printing buffer`8	71	1315.83	1665	1024.39	1250	671.397	873	2512.33	2840	1303.51	1374	1310.6	1498	1071.96	1258	777.342	940	1040	1663	924.63	1112	823.284	929	977.332	1175	394.761	414	749.716	852	1619.76	1819	423.888	445	568.015	688	1889.58	2374	702.054	870	1886.37	2082	1356.54	1692	1592.41	1966	757.215	1082
15	12	printing buffer`8	71	1270.04	1649	1011.26	1229	695.628	846	2493.46	2782	1276.14	1377	1231.54	1450	1104.26	1278	752.266	908	1114.29	1641	849.381	1065	851.778	919	971.86	1131	359.425	378	682.608	801	1662.33	1884	399.414	416	489.518	598	1729.5	2178	704.147	868	1749.27	1926	1343.31	1656	1589.12	1937	792.552	1098
[truncated: 54 more columns]
